# Supplementary material
Source: publisher figshare collection journal article supplement (https://gsajournals.figshare.com/articles/dataset/_/7212530)
Supplement: Supplementary file 1 [file 1]

## Sheet: Raw Data
Order #	Female strain	Female genotype	Female ID	Male strain	Male type	Male ID	Time spent in T&T anesthesia (min)	Time until mated (min)	Time until screen since mated (min)	Proximal uterus	Distal Uterus	Spermatheca	Proximal Gonad	Distal gonad (after bend)	Soma (Body cavity)	Ectopic sperm? y/n =1/0	Non ectopic location(s)	Non ectopic location(s) ID	Ectopic location(s)	Ectopic location(s) ID	Severely invaded? y/n=1/0
41	N2	wildtype	1	JK574	Conspecific	0	48	40	420	1	3	0	0	0	0	0	prox ut +dist ut	4	absent	0	0
42	N2	wildtype	1	JK574	Conspecific	0	48	40	420	1	3	0	0	0	0	0	prox ut +dist ut	4	absent	0	0
43	N2	wildtype	1	JK574	Conspecific	0	48	40	420	1	3	1	0	0	0	0	all	7	absent	0	0
45	N2	wildtype	1	JK574	Conspecific	0	48	40	420	0	3	0	0	0	0	0	dist ut only	2	absent	0	0
46	N2	wildtype	1	JK574	Conspecific	0	48	40	420	1	3	0	0	0	0	0	prox ut +dist ut	4	absent	0	0
168	N2	wildtype	1	JK574	Conspecific	0	38	38	362	1	1	1	0	0	0	0	all	7	absent	0	0
169	N2	wildtype	1	JK574	Conspecific	0	38	38	362	2	3	2	0	0	0	0	all	7	absent	0	0
171	N2	wildtype	1	JK574	Conspecific	0	38	38	362	2	3	2	0	0	0	0	all	7	absent	0	0
172	N2	wildtype	1	JK574	Conspecific	0	38	38	362	2	3	2	0	0	0	0	all	7	absent	0	0
174	N2	wildtype	1	JK574	Conspecific	0	38	38	362	1	3	1	0	0	0	0	all	7	absent	0	0
314	N2	wildtype	1	JK574	Conspecific	0	41	68	389	0	1	1	0	0	0	0	dist ut +sperma	6	absent	0	0
315	N2	wildtype	1	JK574	Conspecific	0	41	68	389	1	3	1	0	0	0	0	all	7	absent	0	0
316	N2	wildtype	1	JK574	Conspecific	0	41	68	389	1	3	1	0	0	0	0	all	7	absent	0	0
317	N2	wildtype	1	JK574	Conspecific	0	41	68	389	1	3	1	0	0	0	0	all	7	absent	0	0
318	N2	wildtype	1	JK574	Conspecific	0	41	68	389	1	2	1	0	0	0	0	all	7	absent	0	0
319	N2	wildtype	1	JK574	Conspecific	0	41	68	389	1	2	0	0	0	0	0	prox ut +dist ut	4	absent	0	0
320	N2	wildtype	1	JK574	Conspecific	0	41	68	389	2	3	2	0	0	0	0	all	7	absent	0	0
321	N2	wildtype	1	JK574	Conspecific	0	41	68	389	1	3	1	0	0	0	0	all	7	absent	0	0
322	N2	wildtype	1	JK574	Conspecific	0	41	68	389	2	3	1	0	0	0	0	all	7	absent	0	0
323	N2	wildtype	1	JK574	Conspecific	0	41	68	389	2	3	1	0	0	0	0	all	7	absent	0	0
324	N2	wildtype	1	JK574	Conspecific	0	41	68	389	1	3	1	0	0	0	0	all	7	absent	0	0
325	N2	wildtype	1	JK574	Conspecific	0	41	68	389	1	3	1	0	0	0	0	all	7	absent	0	0
502	N2	wildtype	1	JK574	Conspecific	0	44	71	404	1	3	1	0	0	0	0	all	7	absent	0	0
503	N2	wildtype	1	JK574	Conspecific	0	44	71	404	1	3	2	0	0	0	0	all	7	absent	0	0
504	N2	wildtype	1	JK574	Conspecific	0	44	71	404	2	1	0	0	0	0	0	prox ut +dist ut	4	absent	0	0
505	N2	wildtype	1	JK574	Conspecific	0	44	71	404	2	3	1	0	0	0	0	all	7	absent	0	0
506	N2	wildtype	1	JK574	Conspecific	0	44	71	404	1	2	1	0	0	0	0	all	7	absent	0	0
507	N2	wildtype	1	JK574	Conspecific	0	44	71	404	1	3	1	0	0	0	0	all	7	absent	0	0
508	N2	wildtype	1	JK574	Conspecific	0	44	71	404	1	2	1	0	0	0	0	all	7	absent	0	0
509	N2	wildtype	1	JK574	Conspecific	0	44	71	404	1	2	0	0	0	0	0	prox ut +dist ut	4	absent	0	0
510	N2	wildtype	1	JK574	Conspecific	0	44	71	404	1	2	1	0	0	0	0	all	7	absent	0	0
511	N2	wildtype	1	JK574	Conspecific	0	44	71	404	1	2	1	0	0	0	0	all	7	absent	0	0
729	N2	wildtype	1	JK574	Conspecific	0	45	79	379	2	3	1	0	0	0	0	all	7	absent	0	0
730	N2	wildtype	1	JK574	Conspecific	0	45	79	379	1	3	1	0	0	0	0	all	7	absent	0	0
731	N2	wildtype	1	JK574	Conspecific	0	45	79	379	1	2	1	0	0	0	0	all	7	absent	0	0
732	N2	wildtype	1	JK574	Conspecific	0	45	79	379	0	2	1	0	0	0	0	dist ut +sperma	6	absent	0	0
733	N2	wildtype	1	JK574	Conspecific	0	45	79	379	2	3	1	0	0	0	0	all	7	absent	0	0
734	N2	wildtype	1	JK574	Conspecific	0	45	79	379	1	3	1	0	0	0	0	all	7	absent	0	0
735	N2	wildtype	1	JK574	Conspecific	0	45	79	379	1	2	1	0	0	0	0	all	7	absent	0	0
736	N2	wildtype	1	JK574	Conspecific	0	45	79	379	1	3	1	0	0	0	0	all	7	absent	0	0
737	N2	wildtype	1	JK574	Conspecific	0	45	79	379	1	3	1	0	0	0	0	all	7	absent	0	0
738	N2	wildtype	1	JK574	Conspecific	0	45	79	379	1	3	1	0	0	0	0	all	7	absent	0	0
1006	N2	wildtype	1	JK574	Conspecific	0	48	81	379	1	2	1	0	0	0	0	all	7	absent	0	0
1007	N2	wildtype	1	JK574	Conspecific	0	48	81	379	1	2	1	0	0	0	0	all	7	absent	0	0
1008	N2	wildtype	1	JK574	Conspecific	0	48	81	379	0	2	2	0	0	0	0	dist ut +sperma	6	absent	0	0
1009	N2	wildtype	1	JK574	Conspecific	0	48	81	379	1	2	1	0	0	0	0	all	7	absent	0	0
1010	N2	wildtype	1	JK574	Conspecific	0	48	81	379	2	3	0	0	0	0	0	prox ut +dist ut	4	absent	0	0
1011	N2	wildtype	1	JK574	Conspecific	0	48	81	379	0	2	1	0	0	0	0	dist ut +sperma	6	absent	0	0
1012	N2	wildtype	1	JK574	Conspecific	0	48	81	379	0	2	2	0	0	0	0	dist ut +sperma	6	absent	0	0
1206	N2	wildtype	1	JK574	Conspecific	0	42	81	427	1	2	1	0	0	0	0	all	7	absent	0	0
1207	N2	wildtype	1	JK574	Conspecific	0	42	81	427	2	2	1	0	0	0	0	all	7	absent	0	0
1209	N2	wildtype	1	JK574	Conspecific	0	42	81	427	0	2	1	0	0	0	0	dist ut +sperma	6	absent	0	0
1210	N2	wildtype	1	JK574	Conspecific	0	42	81	427	1	2	1	0	0	0	0	all	7	absent	0	0
1211	N2	wildtype	1	JK574	Conspecific	0	42	81	427	1	2	2	0	0	0	0	all	7	absent	0	0
1212	N2	wildtype	1	JK574	Conspecific	0	42	81	427	1	2	1	0	0	0	0	all	7	absent	0	0
1213	N2	wildtype	1	JK574	Conspecific	0	42	81	427	1	2	2	0	0	0	0	all	7	absent	0	0
1214	N2	wildtype	1	JK574	Conspecific	0	42	81	427	0	2	1	0	0	0	0	dist ut +sperma	6	absent	0	0
1359	N2	wildtype	1	JK574	Conspecific	0	47	86	446	1	2	2	0	0	0	0	all	7	absent	0	0
1360	N2	wildtype	1	JK574	Conspecific	0	47	86	446	1	2	2	0	0	0	0	all	7	absent	0	0
1361	N2	wildtype	1	JK574	Conspecific	0	47	86	446	2	2	2	0	0	0	0	all	7	absent	0	0
1363	N2	wildtype	1	JK574	Conspecific	0	47	86	446	2	3	2	0	0	0	0	all	7	absent	0	0
1364	N2	wildtype	1	JK574	Conspecific	0	47	86	446	2	3	1	0	0	0	0	all	7	absent	0	0
1365	N2	wildtype	1	JK574	Conspecific	0	47	86	446	2	2	1	0	0	0	0	all	7	absent	0	0
1366	N2	wildtype	1	JK574	Conspecific	0	47	86	446	1	2	1	0	0	0	0	all	7	absent	0	0
1367	N2	wildtype	1	JK574	Conspecific	0	47	86	446	2	3	0	0	0	0	0	prox ut +dist ut	4	absent	0	0
1549	N2	wildtype	1	JK574	Conspecific	0	52	85	412	2	2	2	0	0	0	0	all	7	absent	0	0
1550	N2	wildtype	1	JK574	Conspecific	0	52	85	412	2	2	1	0	0	0	0	all	7	absent	0	0
1551	N2	wildtype	1	JK574	Conspecific	0	52	85	412	1	2	1	0	0	0	0	all	7	absent	0	0
1552	N2	wildtype	1	JK574	Conspecific	0	52	85	412	2	3	2	0	0	0	0	all	7	absent	0	0
1553	N2	wildtype	1	JK574	Conspecific	0	52	85	412	2	3	2	0	0	0	0	all	7	absent	0	0
1554	N2	wildtype	1	JK574	Conspecific	0	52	85	412	1	2	1	0	0	0	0	all	7	absent	0	0
1660	N2	wildtype	1	JK574	Conspecific	0	43	71	422	1	2	1	0	0	0	0	all	7	absent	0	0
1661	N2	wildtype	1	JK574	Conspecific	0	43	71	422	1	2	2	0	0	0	0	all	7	absent	0	0
1662	N2	wildtype	1	JK574	Conspecific	0	43	71	422	0	1	1	0	0	0	0	dist ut +sperma	6	absent	0	0
1663	N2	wildtype	1	JK574	Conspecific	0	43	71	422	1	3	2	0	0	0	0	all	7	absent	0	0
1664	N2	wildtype	1	JK574	Conspecific	0	43	71	422	2	2	1	0	0	0	0	all	7	absent	0	0
1666	N2	wildtype	1	JK574	Conspecific	0	43	71	422	1	2	2	0	0	0	0	all	7	absent	0	0
1667	N2	wildtype	1	JK574	Conspecific	0	43	71	422	1	2	2	0	0	0	0	all	7	absent	0	0
1668	N2	wildtype	1	JK574	Conspecific	0	43	71	422	2	2	1	0	0	0	0	all	7	absent	0	0
1669	N2	wildtype	1	JK574	Conspecific	0	43	71	422	1	2	1	0	0	0	0	all	7	absent	0	0
1670	N2	wildtype	1	JK574	Conspecific	0	43	71	422	1	2	2	0	0	0	0	all	7	absent	0	0
1671	N2	wildtype	1	JK574	Conspecific	0	43	71	422	2	2	2	0	0	0	0	all	7	absent	0	0
1672	N2	wildtype	1	JK574	Conspecific	0	43	71	422	2	2	1	0	0	0	0	all	7	absent	0	0
1674	N2	wildtype	1	JK574	Conspecific	0	43	71	422	2	2	2	0	0	0	0	all	7	absent	0	0
1675	N2	wildtype	1	JK574	Conspecific	0	43	71	422	2	3	2	0	0	0	0	all	7	absent	0	0
55	AD186	egg-1	2	JK574	Conspecific	0	47	40	432	2	0	0	0	0	0	0	prox ut only	1	absent	0	0
56	AD186	egg-1	2	JK574	Conspecific	0	47	40	432	3	2	0	0	0	0	0	prox ut +dist ut	4	absent	0	0
57	AD186	egg-1	2	JK574	Conspecific	0	47	40	432	1	0	0	0	0	0	0	prox ut only	1	absent	0	0
58	AD186	egg-1	2	JK574	Conspecific	0	47	40	432	2	3	0	0	0	0	0	prox ut +dist ut	4	absent	0	0
59	AD186	egg-1	2	JK574	Conspecific	0	47	40	432	2	0	0	0	0	0	0	prox ut only	1	absent	0	0
60	AD186	egg-1	2	JK574	Conspecific	0	47	40	432	1	2	0	0	0	0	0	prox ut +dist ut	4	absent	0	0
61	AD186	egg-1	2	JK574	Conspecific	0	47	40	432	3	3	0	0	0	0	0	prox ut +dist ut	4	absent	0	0
201	AD186	egg-1	2	JK574	Conspecific	0	43	30	375	1	3	0	0	0	0	0	prox ut +dist ut	4	absent	0	0
202	AD186	egg-1	2	JK574	Conspecific	0	43	30	375	2	3	0	0	0	0	0	prox ut +dist ut	4	absent	0	0
203	AD186	egg-1	2	JK574	Conspecific	0	43	30	375	2	3	0	0	0	0	0	prox ut +dist ut	4	absent	0	0
204	AD186	egg-1	2	JK574	Conspecific	0	43	30	375	3	3	1	0	0	0	0	all	7	absent	0	0
205	AD186	egg-1	2	JK574	Conspecific	0	43	30	375	1	3	3	0	0	0	0	all	7	absent	0	0
206	AD186	egg-1	2	JK574	Conspecific	0	43	30	375	3	3	2	0	0	0	0	all	7	absent	0	0
207	AD186	egg-1	2	JK574	Conspecific	0	43	30	375	2	3	1	0	0	0	0	all	7	absent	0	0
208	AD186	egg-1	2	JK574	Conspecific	0	43	30	375	3	3	0	0	0	0	0	prox ut +dist ut	4	absent	0	0
295	AD186	egg-1	2	JK574	Conspecific	0	41	68	370	2	3	1	0	0	0	0	all	7	absent	0	0
296	AD186	egg-1	2	JK574	Conspecific	0	41	68	370	2	3	1	0	0	0	0	all	7	absent	0	0
300	AD186	egg-1	2	JK574	Conspecific	0	41	68	370	2	2	0	0	0	0	0	prox ut +dist ut	4	absent	0	0
301	AD186	egg-1	2	JK574	Conspecific	0	41	68	370	2	2	1	0	0	0	0	all	7	absent	0	0
302	AD186	egg-1	2	JK574	Conspecific	0	41	68	370	3	2	1	0	0	0	0	all	7	absent	0	0
303	AD186	egg-1	2	JK574	Conspecific	0	41	68	370	1	2	1	0	0	0	0	all	7	absent	0	0
304	AD186	egg-1	2	JK574	Conspecific	0	41	68	370	1	2	1	0	0	0	0	all	7	absent	0	0
305	AD186	egg-1	2	JK574	Conspecific	0	41	68	370	1	1	0	0	0	0	0	prox ut +dist ut	4	absent	0	0
643	AD186	egg-1	2	JK574	Conspecific	0	48	81	271	2	2	0	0	0	0	0	prox ut +dist ut	4	absent	0	0
644	AD186	egg-1	2	JK574	Conspecific	0	48	81	271	2	3	0	0	0	0	0	prox ut +dist ut	4	absent	0	0
645	AD186	egg-1	2	JK574	Conspecific	0	48	81	271	2	2	0	0	0	0	0	prox ut +dist ut	4	absent	0	0
646	AD186	egg-1	2	JK574	Conspecific	0	48	81	271	2	2	1	0	0	0	0	all	7	absent	0	0
647	AD186	egg-1	2	JK574	Conspecific	0	48	81	271	2	0	0	0	0	0	0	prox ut only	1	absent	0	0
648	AD186	egg-1	2	JK574	Conspecific	0	48	81	271	3	3	2	0	0	0	0	all	7	absent	0	0
649	AD186	egg-1	2	JK574	Conspecific	0	48	81	271	2	2	1	0	0	0	0	all	7	absent	0	0
650	AD186	egg-1	2	JK574	Conspecific	0	48	81	271	2	3	1	0	0	0	0	all	7	absent	0	0
651	AD186	egg-1	2	JK574	Conspecific	0	48	81	271	2	2	1	0	0	0	0	all	7	absent	0	0
987	AD186	egg-1	2	JK574	Conspecific	0	48	80	362	2	1	0	0	0	0	0	prox ut +dist ut	4	absent	0	0
988	AD186	egg-1	2	JK574	Conspecific	0	48	80	362	1	1	0	0	0	0	0	prox ut +dist ut	4	absent	0	0
989	AD186	egg-1	2	JK574	Conspecific	0	48	80	362	2	2	1	0	0	0	0	all	7	absent	0	0
990	AD186	egg-1	2	JK574	Conspecific	0	48	80	362	2	1	1	0	0	0	0	all	7	absent	0	0
991	AD186	egg-1	2	JK574	Conspecific	0	48	80	362	2	3	1	0	0	0	0	all	7	absent	0	0
992	AD186	egg-1	2	JK574	Conspecific	0	48	80	362	2	2	0	0	0	0	0	prox ut +dist ut	4	absent	0	0
993	AD186	egg-1	2	JK574	Conspecific	0	48	80	362	2	1	0	0	0	0	0	prox ut +dist ut	4	absent	0	0
994	AD186	egg-1	2	JK574	Conspecific	0	48	80	362	2	2	1	0	0	0	0	all	7	absent	0	0
995	AD186	egg-1	2	JK574	Conspecific	0	48	80	362	1	1	1	0	0	0	0	all	7	absent	0	0
358	AU98	inx-14	3	JK574	Conspecific	0	48	70	331	2	3	1	0	0	0	0	all	7	absent	0	0
359	AU98	inx-14	3	JK574	Conspecific	0	48	70	331	3	3	2	0	0	0	0	all	7	absent	0	0
360	AU98	inx-14	3	JK574	Conspecific	0	48	70	331	2	3	1	0	0	0	0	all	7	absent	0	0
361	AU98	inx-14	3	JK574	Conspecific	0	48	70	331	2	3	1	0	0	0	0	all	7	absent	0	0
362	AU98	inx-14	3	JK574	Conspecific	0	48	70	331	0	3	1	0	0	0	0	dist ut +sperma	6	absent	0	0
363	AU98	inx-14	3	JK574	Conspecific	0	48	70	331	1	3	1	0	0	0	0	all	7	absent	0	0
366	AU98	inx-14	3	JK574	Conspecific	0	48	70	331	2	3	0	0	0	0	0	prox ut +dist ut	4	absent	0	0
675	AU98	inx-14	3	JK574	Conspecific	0	47	80	308	2	3	1	0	0	0	0	all	7	absent	0	0
676	AU98	inx-14	3	JK574	Conspecific	0	47	80	308	2	2	1	0	0	0	0	all	7	absent	0	0
677	AU98	inx-14	3	JK574	Conspecific	0	47	80	308	1	3	1	0	0	0	0	all	7	absent	0	0
678	AU98	inx-14	3	JK574	Conspecific	0	47	80	308	1	2	1	0	0	0	0	all	7	absent	0	0
679	AU98	inx-14	3	JK574	Conspecific	0	47	80	308	1	2	1	0	0	0	0	all	7	absent	0	0
680	AU98	inx-14	3	JK574	Conspecific	0	47	80	308	2	3	1	0	0	0	0	all	7	absent	0	0
681	AU98	inx-14	3	JK574	Conspecific	0	47	80	308	1	2	1	0	0	0	0	all	7	absent	0	0
682	AU98	inx-14	3	JK574	Conspecific	0	47	80	308	1	2	1	0	0	0	0	all	7	absent	0	0
683	AU98	inx-14	3	JK574	Conspecific	0	47	80	308	2	3	2	0	0	0	0	all	7	absent	0	0
684	AU98	inx-14	3	JK574	Conspecific	0	47	80	308	2	3	2	0	0	0	0	all	7	absent	0	0
685	AU98	inx-14	3	JK574	Conspecific	0	47	80	308	2	3	1	0	0	0	0	all	7	absent	0	0
146	BA671	spe-9	4	JK574	Conspecific	0	39	35	325	2	3	0	0	0	0	0	prox ut +dist ut	4	absent	0	0
147	BA671	spe-9	4	JK574	Conspecific	0	39	35	325	2	3	1	0	0	0	0	all	7	absent	0	0
148	BA671	spe-9	4	JK574	Conspecific	0	39	35	325	2	3	1	0	0	0	0	all	7	absent	0	0
149	BA671	spe-9	4	JK574	Conspecific	0	39	35	325	3	3	1	0	0	0	0	all	7	absent	0	0
150	BA671	spe-9	4	JK574	Conspecific	0	39	35	325	2	3	0	0	0	0	0	prox ut +dist ut	4	absent	0	0
151	BA671	spe-9	4	JK574	Conspecific	0	39	35	325	1	3	2	0	0	0	0	all	7	absent	0	0
152	BA671	spe-9	4	JK574	Conspecific	0	39	35	325	2	3	2	0	0	0	0	all	7	absent	0	0
409	BA671	spe-9	4	JK574	Conspecific	0	45	72	392	2	3	2	0	0	0	0	all	7	absent	0	0
410	BA671	spe-9	4	JK574	Conspecific	0	45	72	392	3	3	1	0	0	0	0	all	7	absent	0	0
413	BA671	spe-9	4	JK574	Conspecific	0	45	72	392	2	3	1	0	0	0	0	all	7	absent	0	0
414	BA671	spe-9	4	JK574	Conspecific	0	45	72	392	3	3	1	0	0	0	0	all	7	absent	0	0
488	BA671	spe-9	4	JK574	Conspecific	0	46	70	384	2	3	1	0	0	0	0	all	7	absent	0	0
489	BA671	spe-9	4	JK574	Conspecific	0	46	70	384	1	2	1	0	0	0	0	all	7	absent	0	0
490	BA671	spe-9	4	JK574	Conspecific	0	46	70	384	1	2	2	0	0	0	0	all	7	absent	0	0
491	BA671	spe-9	4	JK574	Conspecific	0	46	70	384	1	2	1	0	0	0	0	all	7	absent	0	0
492	BA671	spe-9	4	JK574	Conspecific	0	46	70	384	1	3	2	0	0	0	0	all	7	absent	0	0
493	BA671	spe-9	4	JK574	Conspecific	0	46	70	384	1	3	1	0	0	0	0	all	7	absent	0	0
494	BA671	spe-9	4	JK574	Conspecific	0	46	70	384	1	3	0	0	0	0	0	prox ut +dist ut	4	absent	0	0
495	BA671	spe-9	4	JK574	Conspecific	0	46	70	384	2	3	1	0	0	0	0	all	7	absent	0	0
742	BA671	spe-9	4	JK574	Conspecific	0	47	69	338	1	2	1	0	0	0	0	all	7	absent	0	0
743	BA671	spe-9	4	JK574	Conspecific	0	47	69	338	2	3	2	0	0	0	0	all	7	absent	0	0
744	BA671	spe-9	4	JK574	Conspecific	0	47	69	338	3	3	2	0	0	0	0	all	7	absent	0	0
745	BA671	spe-9	4	JK574	Conspecific	0	47	69	338	2	3	0	0	0	0	0	prox ut +dist ut	4	absent	0	0
746	BA671	spe-9	4	JK574	Conspecific	0	47	69	338	1	3	2	0	0	0	0	all	7	absent	0	0
748	BA671	spe-9	4	JK574	Conspecific	0	47	69	338	2	3	1	0	0	0	0	all	7	absent	0	0
963	BA671	spe-9	4	JK574	Conspecific	0	49	74	332	3	3	1	0	0	0	0	all	7	absent	0	0
964	BA671	spe-9	4	JK574	Conspecific	0	49	74	332	2	2	0	0	0	0	0	prox ut +dist ut	4	absent	0	0
965	BA671	spe-9	4	JK574	Conspecific	0	49	74	332	1	2	1	0	0	0	0	all	7	absent	0	0
966	BA671	spe-9	4	JK574	Conspecific	0	49	74	332	3	3	2	0	0	0	0	all	7	absent	0	0
967	BA671	spe-9	4	JK574	Conspecific	0	49	74	332	1	2	2	0	0	0	0	all	7	absent	0	0
968	BA671	spe-9	4	JK574	Conspecific	0	49	74	332	3	3	2	0	0	0	0	all	7	absent	0	0
969	BA671	spe-9	4	JK574	Conspecific	0	49	74	332	2	3	1	0	0	0	0	all	7	absent	0	0
970	BA671	spe-9	4	JK574	Conspecific	0	49	74	332	3	3	2	0	0	0	0	all	7	absent	0	0
971	BA671	spe-9	4	JK574	Conspecific	0	49	74	332	1	2	1	0	0	0	0	all	7	absent	0	0
1149	BA671	spe-9	4	JK574	Conspecific	0	48	82	362	2	2	2	0	0	0	0	all	7	absent	0	0
1150	BA671	spe-9	4	JK574	Conspecific	0	48	82	362	0	2	1	0	0	0	0	dist ut +sperma	6	absent	0	0
1151	BA671	spe-9	4	JK574	Conspecific	0	48	82	362	2	2	2	0	0	0	0	all	7	absent	0	0
1152	BA671	spe-9	4	JK574	Conspecific	0	48	82	362	2	2	2	0	0	0	0	all	7	absent	0	0
1153	BA671	spe-9	4	JK574	Conspecific	0	48	82	362	2	3	2	0	0	0	0	all	7	absent	0	0
1154	BA671	spe-9	4	JK574	Conspecific	0	48	82	362	3	3	2	0	0	0	0	all	7	absent	0	0
1155	BA671	spe-9	4	JK574	Conspecific	0	48	82	362	2	3	2	0	0	0	0	all	7	absent	0	0
1156	BA671	spe-9	4	JK574	Conspecific	0	48	82	362	2	2	1	0	0	0	0	all	7	absent	0	0
1157	BA671	spe-9	4	JK574	Conspecific	0	48	82	362	2	2	1	0	0	0	0	all	7	absent	0	0
1158	BA671	spe-9	4	JK574	Conspecific	0	48	82	362	2	2	1	0	0	0	0	all	7	absent	0	0
1159	BA671	spe-9	4	JK574	Conspecific	0	48	82	362	2	2	1	0	0	0	0	all	7	absent	0	0
1160	BA671	spe-9	4	JK574	Conspecific	0	48	82	362	2	2	0	0	0	0	0	prox ut +dist ut	4	absent	0	0
156	CB1370	daf-2	5	JK574	Conspecific	0	39	37	337	3	3	2	0	0	0	0	all	7	absent	0	0
157	CB1370	daf-2	5	JK574	Conspecific	0	39	37	337	2	3	2	0	0	0	0	all	7	absent	0	0
159	CB1370	daf-2	5	JK574	Conspecific	0	39	37	337	3	3	3	0	0	0	0	all	7	absent	0	0
160	CB1370	daf-2	5	JK574	Conspecific	0	39	37	337	1	3	2	0	0	0	0	all	7	absent	0	0
161	CB1370	daf-2	5	JK574	Conspecific	0	39	37	337	3	3	2	0	0	0	0	all	7	absent	0	0
423	CB1370	daf-2	5	JK574	Conspecific	0	42	71	414	3	3	0	0	0	0	0	prox ut +dist ut	4	absent	0	0
425	CB1370	daf-2	5	JK574	Conspecific	0	42	71	414	3	3	0	0	0	0	0	prox ut +dist ut	4	absent	0	0
426	CB1370	daf-2	5	JK574	Conspecific	0	42	71	414	2	3	1	0	0	0	0	all	7	absent	0	0
427	CB1370	daf-2	5	JK574	Conspecific	0	42	71	414	3	3	1	0	0	0	0	all	7	absent	0	0
428	CB1370	daf-2	5	JK574	Conspecific	0	42	71	414	2	3	2	0	0	0	0	all	7	absent	0	0
429	CB1370	daf-2	5	JK574	Conspecific	0	42	71	414	3	3	1	0	0	0	0	all	7	absent	0	0
430	CB1370	daf-2	5	JK574	Conspecific	0	42	71	414	3	3	1	0	0	0	0	all	7	absent	0	0
456	CB1370	daf-2	5	JK574	Conspecific	0	48	70	353	2	3	1	0	0	0	0	all	7	absent	0	0
457	CB1370	daf-2	5	JK574	Conspecific	0	48	70	353	2	3	2	0	0	0	0	all	7	absent	0	0
459	CB1370	daf-2	5	JK574	Conspecific	0	48	70	353	1	1	0	0	0	0	0	prox ut +dist ut	4	absent	0	0
460	CB1370	daf-2	5	JK574	Conspecific	0	48	70	353	1	3	1	0	0	0	0	all	7	absent	0	0
462	CB1370	daf-2	5	JK574	Conspecific	0	48	70	353	2	3	1	0	0	0	0	all	7	absent	0	0
463	CB1370	daf-2	5	JK574	Conspecific	0	48	70	353	1	3	1	0	0	0	0	all	7	absent	0	0
464	CB1370	daf-2	5	JK574	Conspecific	0	48	70	353	1	1	1	0	0	0	0	all	7	absent	0	0
933	CB1370	daf-2	5	JK574	Conspecific	0	53	69	285	3	3	2	0	0	0	0	all	7	absent	0	0
934	CB1370	daf-2	5	JK574	Conspecific	0	53	69	285	3	3	1	0	0	0	0	all	7	absent	0	0
935	CB1370	daf-2	5	JK574	Conspecific	0	53	69	285	2	2	0	0	0	0	0	prox ut +dist ut	4	absent	0	0
62	CZ337	vab-1	7	JK574	Conspecific	0	40	40	437	3	2	0	0	0	0	0	prox ut +dist ut	4	absent	0	0
63	CZ337	vab-1	7	JK574	Conspecific	0	40	40	437	1	3	2	0	0	0	0	all	7	absent	0	0
64	CZ337	vab-1	7	JK574	Conspecific	0	40	40	437	1	3	2	0	0	0	0	all	7	absent	0	0
65	CZ337	vab-1	7	JK574	Conspecific	0	40	40	437	1	2	0	0	0	0	0	prox ut +dist ut	4	absent	0	0
66	CZ337	vab-1	7	JK574	Conspecific	0	40	40	437	1	3	3	0	0	0	0	all	7	absent	0	0
67	CZ337	vab-1	7	JK574	Conspecific	0	40	40	437	1	2	1	0	0	0	0	all	7	absent	0	0
68	CZ337	vab-1	7	JK574	Conspecific	0	40	40	437	2	3	1	0	0	0	0	all	7	absent	0	0
69	CZ337	vab-1	7	JK574	Conspecific	0	40	40	437	1	3	1	0	0	0	0	all	7	absent	0	0
392	CZ337	vab-1	7	JK574	Conspecific	0	47	71	373	2	3	1	0	0	0	0	all	7	absent	0	0
393	CZ337	vab-1	7	JK574	Conspecific	0	47	71	373	2	2	1	0	0	0	0	all	7	absent	0	0
396	CZ337	vab-1	7	JK574	Conspecific	0	47	71	373	2	3	3	0	0	0	0	all	7	absent	0	0
397	CZ337	vab-1	7	JK574	Conspecific	0	47	71	373	2	3	1	0	0	0	0	all	7	absent	0	0
398	CZ337	vab-1	7	JK574	Conspecific	0	47	71	373	2	3	1	0	0	0	0	all	7	absent	0	0
399	CZ337	vab-1	7	JK574	Conspecific	0	47	71	373	2	3	1	0	0	0	0	all	7	absent	0	0
400	CZ337	vab-1	7	JK574	Conspecific	0	47	71	373	2	3	1	0	0	0	0	all	7	absent	0	0
401	CZ337	vab-1	7	JK574	Conspecific	0	47	71	373	1	3	2	0	0	0	0	all	7	absent	0	0
402	CZ337	vab-1	7	JK574	Conspecific	0	47	71	373	3	3	1	0	0	0	0	all	7	absent	0	0
922	CZ337	vab-1	7	JK574	Conspecific	0	44	72	344	2	3	0	0	0	0	0	prox ut +dist ut	4	absent	0	0
923	CZ337	vab-1	7	JK574	Conspecific	0	44	72	344	1	2	1	0	0	0	0	all	7	absent	0	0
924	CZ337	vab-1	7	JK574	Conspecific	0	44	72	344	2	3	0	0	0	0	0	prox ut +dist ut	4	absent	0	0
925	CZ337	vab-1	7	JK574	Conspecific	0	44	72	344	1	2	1	0	0	0	0	all	7	absent	0	0
926	CZ337	vab-1	7	JK574	Conspecific	0	44	72	344	2	3	1	0	0	0	0	all	7	absent	0	0
927	CZ337	vab-1	7	JK574	Conspecific	0	44	72	344	2	2	0	0	0	0	0	prox ut +dist ut	4	absent	0	0
928	CZ337	vab-1	7	JK574	Conspecific	0	44	72	344	2	2	1	0	0	0	0	all	7	absent	0	0
261	DG1604	ceh-18;fog-2	8	JK574	Conspecific	0	44	69	329	1	2	1	0	0	0	0	all	7	absent	0	0
262	DG1604	ceh-18;fog-2	8	JK574	Conspecific	0	44	69	329	2	3	2	0	0	0	0	all	7	absent	0	0
263	DG1604	ceh-18;fog-2	8	JK574	Conspecific	0	44	69	329	2	3	2	0	0	0	0	all	7	absent	0	0
264	DG1604	ceh-18;fog-2	8	JK574	Conspecific	0	44	69	329	0	1	1	0	0	0	0	dist ut +sperma	6	absent	0	0
265	DG1604	ceh-18;fog-2	8	JK574	Conspecific	0	44	69	329	1	2	1	0	0	0	0	all	7	absent	0	0
266	DG1604	ceh-18;fog-2	8	JK574	Conspecific	0	44	69	329	1	3	1	0	0	0	0	all	7	absent	0	0
267	DG1604	ceh-18;fog-2	8	JK574	Conspecific	0	44	69	329	2	3	2	0	0	0	0	all	7	absent	0	0
268	DG1604	ceh-18;fog-2	8	JK574	Conspecific	0	44	69	329	2	2	2	0	0	0	0	all	7	absent	0	0
269	DG1604	ceh-18;fog-2	8	JK574	Conspecific	0	44	69	329	1	3	1	0	0	0	0	all	7	absent	0	0
270	DG1604	ceh-18;fog-2	8	JK574	Conspecific	0	44	69	329	3	3	1	0	0	0	0	all	7	absent	0	0
271	DG1604	ceh-18;fog-2	8	JK574	Conspecific	0	44	69	329	1	2	2	0	0	0	0	all	7	absent	0	0
710	DG1604	ceh-18;fog-2	8	JK574	Conspecific	0	47	80	356	3	3	1	0	0	0	0	all	7	absent	0	0
711	DG1604	ceh-18;fog-2	8	JK574	Conspecific	0	47	80	356	2	3	1	0	0	0	0	all	7	absent	0	0
712	DG1604	ceh-18;fog-2	8	JK574	Conspecific	0	47	80	356	1	2	1	0	0	0	0	all	7	absent	0	0
713	DG1604	ceh-18;fog-2	8	JK574	Conspecific	0	47	80	356	1	2	2	0	0	0	0	all	7	absent	0	0
714	DG1604	ceh-18;fog-2	8	JK574	Conspecific	0	47	80	356	2	3	2	0	0	0	0	all	7	absent	0	0
715	DG1604	ceh-18;fog-2	8	JK574	Conspecific	0	47	80	356	2	3	2	0	0	0	0	all	7	absent	0	0
955	DG1604	ceh-18;fog-2	8	JK574	Conspecific	0	50	72	317	1	2	1	0	0	0	0	all	7	absent	0	0
956	DG1604	ceh-18;fog-2	8	JK574	Conspecific	0	50	72	317	1	1	1	0	0	0	0	all	7	absent	0	0
957	DG1604	ceh-18;fog-2	8	JK574	Conspecific	0	50	72	317	2	2	2	0	0	0	0	all	7	absent	0	0
958	DG1604	ceh-18;fog-2	8	JK574	Conspecific	0	50	72	317	1	2	2	0	0	0	0	all	7	absent	0	0
959	DG1604	ceh-18;fog-2	8	JK574	Conspecific	0	50	72	317	3	3	2	0	0	0	0	all	7	absent	0	0
1022	DG1604	ceh-18;fog-2	8	JK574	Conspecific	0	52	76	300	2	2	0	0	0	0	0	prox ut +dist ut	4	absent	0	0
1023	DG1604	ceh-18;fog-2	8	JK574	Conspecific	0	52	76	300	1	1	2	0	0	0	0	all	7	absent	0	0
1024	DG1604	ceh-18;fog-2	8	JK574	Conspecific	0	52	76	300	1	2	2	0	0	0	0	all	7	absent	0	0
1025	DG1604	ceh-18;fog-2	8	JK574	Conspecific	0	52	76	300	2	3	1	0	0	0	0	all	7	absent	0	0
1026	DG1604	ceh-18;fog-2	8	JK574	Conspecific	0	52	76	300	2	3	1	0	0	0	0	all	7	absent	0	0
231	DG1612	vab-1;fog-2	9	JK574	Conspecific	0	46	69	290	2	3	1	0	0	0	0	all	7	absent	0	0
234	DG1612	vab-1;fog-2	9	JK574	Conspecific	0	46	69	290	0	3	2	0	0	0	0	dist ut +sperma	6	absent	0	0
437	DG1612	vab-1;fog-2	9	JK574	Conspecific	0	48	68	333	2	2	1	0	0	0	0	all	7	absent	0	0
438	DG1612	vab-1;fog-2	9	JK574	Conspecific	0	48	68	333	2	2	1	0	0	0	0	all	7	absent	0	0
439	DG1612	vab-1;fog-2	9	JK574	Conspecific	0	48	68	333	1	2	1	0	0	0	0	all	7	absent	0	0
440	DG1612	vab-1;fog-2	9	JK574	Conspecific	0	48	68	333	2	3	2	0	0	0	0	all	7	absent	0	0
441	DG1612	vab-1;fog-2	9	JK574	Conspecific	0	48	68	333	1	2	0	0	0	0	0	prox ut +dist ut	4	absent	0	0
442	DG1612	vab-1;fog-2	9	JK574	Conspecific	0	48	68	333	0	2	1	0	0	0	0	dist ut +sperma	6	absent	0	0
443	DG1612	vab-1;fog-2	9	JK574	Conspecific	0	48	68	333	2	2	1	0	0	0	0	all	7	absent	0	0
445	DG1612	vab-1;fog-2	9	JK574	Conspecific	0	48	68	333	1	2	1	0	0	0	0	all	7	absent	0	0
1033	DG1612	vab-1;fog-2	9	JK574	Conspecific	0	52	83	316	2	2	1	0	0	0	0	all	7	absent	0	0
1034	DG1612	vab-1;fog-2	9	JK574	Conspecific	0	52	83	316	2	3	1	0	0	0	0	all	7	absent	0	0
1035	DG1612	vab-1;fog-2	9	JK574	Conspecific	0	52	83	316	2	2	1	0	0	0	0	all	7	absent	0	0
1036	DG1612	vab-1;fog-2	9	JK574	Conspecific	0	52	83	316	2	2	2	0	0	0	0	all	7	absent	0	0
1039	DG1612	vab-1;fog-2	9	JK574	Conspecific	0	52	83	316	2	2	0	0	0	0	0	prox ut +dist ut	4	absent	0	0
1041	DG1612	vab-1;fog-2	9	JK574	Conspecific	0	52	83	316	2	2	2	0	0	0	0	all	7	absent	0	0
1336	DG1612	vab-1;fog-2	9	JK574	Conspecific	0	50	86	418	1	2	1	0	0	0	0	all	7	absent	0	0
1339	DG1612	vab-1;fog-2	9	JK574	Conspecific	0	50	86	418	2	2	1	0	0	0	0	all	7	absent	0	0
1435	DG1612	vab-1;fog-2	9	JK574	Conspecific	0	58	79	336	1	1	0	0	0	0	0	prox ut +dist ut	4	absent	0	0
1436	DG1612	vab-1;fog-2	9	JK574	Conspecific	0	58	79	336	2	3	2	0	0	0	0	all	7	absent	0	0
34	GR1034	ceh-18	10	JK574	Conspecific	0	49	39	414	3	3	0	0	0	0	0	prox ut +dist ut	4	absent	0	0
35	GR1034	ceh-18	10	JK574	Conspecific	0	49	39	414	0	2	0	0	0	0	0	dist ut only	2	absent	0	0
36	GR1034	ceh-18	10	JK574	Conspecific	0	49	39	414	2	3	0	0	0	0	0	prox ut +dist ut	4	absent	0	0
37	GR1034	ceh-18	10	JK574	Conspecific	0	49	39	414	1	2	2	0	0	0	0	all	7	absent	0	0
38	GR1034	ceh-18	10	JK574	Conspecific	0	49	39	414	1	3	3	0	0	0	0	all	7	absent	0	0
39	GR1034	ceh-18	10	JK574	Conspecific	0	49	39	414	1	2	0	0	0	0	0	prox ut +dist ut	4	absent	0	0
40	GR1034	ceh-18	10	JK574	Conspecific	0	49	39	414	1	3	2	0	0	0	0	all	7	absent	0	0
216	GR1034	ceh-18	10	JK574	Conspecific	0	42	37	388	2	3	0	0	0	0	0	prox ut +dist ut	4	absent	0	0
217	GR1034	ceh-18	10	JK574	Conspecific	0	42	37	388	1	2	0	0	0	0	0	prox ut +dist ut	4	absent	0	0
220	GR1034	ceh-18	10	JK574	Conspecific	0	42	37	388	2	3	0	0	0	0	0	prox ut +dist ut	4	absent	0	0
632	GR1034	ceh-18	10	JK574	Conspecific	0	48	73	468	1	2	1	0	0	0	0	all	7	absent	0	0
634	GR1034	ceh-18	10	JK574	Conspecific	0	48	73	468	1	2	2	0	0	0	0	all	7	absent	0	0
636	GR1034	ceh-18	10	JK574	Conspecific	0	48	73	468	1	2	1	0	0	0	0	all	7	absent	0	0
637	GR1034	ceh-18	10	JK574	Conspecific	0	48	73	468	1	2	1	0	0	0	0	all	7	absent	0	0
638	GR1034	ceh-18	10	JK574	Conspecific	0	48	73	468	2	3	2	0	0	0	0	all	7	absent	0	0
1617	GR1034	ceh-18	10	JK574	Conspecific	0	43	75	387	1	2	2	0	0	0	0	all	7	absent	0	0
1618	GR1034	ceh-18	10	JK574	Conspecific	0	43	75	387	2	2	2	0	0	0	0	all	7	absent	0	0
1619	GR1034	ceh-18	10	JK574	Conspecific	0	43	75	387	2	2	2	0	0	0	0	all	7	absent	0	0
1620	GR1034	ceh-18	10	JK574	Conspecific	0	43	75	387	1	2	1	0	0	0	0	all	7	absent	0	0
1623	GR1034	ceh-18	10	JK574	Conspecific	0	43	75	387	1	2	1	0	0	0	0	all	7	absent	0	0
1624	GR1034	ceh-18	10	JK574	Conspecific	0	43	75	387	2	2	2	0	0	0	0	all	7	absent	0	0
1625	GR1034	ceh-18	10	JK574	Conspecific	0	43	75	387	1	2	1	0	0	0	0	all	7	absent	0	0
1626	GR1034	ceh-18	10	JK574	Conspecific	0	43	75	387	0	2	2	0	0	0	0	dist ut +sperma	6	absent	0	0
1627	GR1034	ceh-18	10	JK574	Conspecific	0	43	75	387	2	2	1	0	0	0	0	all	7	absent	0	0
1628	GR1034	ceh-18	10	JK574	Conspecific	0	43	75	387	2	2	2	0	0	0	0	all	7	absent	0	0
1630	GR1034	ceh-18	10	JK574	Conspecific	0	43	75	387	2	2	2	0	0	0	0	all	7	absent	0	0
178	MT9940	dpl-1	11	JK574	Conspecific	0	37	38	376	1	3	0	0	0	0	0	prox ut +dist ut	4	absent	0	0
179	MT9940	dpl-1	11	JK574	Conspecific	0	37	38	376	1	3	0	0	0	0	0	prox ut +dist ut	4	absent	0	0
537	MT9940	dpl-1	11	JK574	Conspecific	0	52	66	380	2	3	2	0	0	0	0	all	7	absent	0	0
538	MT9940	dpl-1	11	JK574	Conspecific	0	52	66	380	1	2	1	0	0	0	0	all	7	absent	0	0
539	MT9940	dpl-1	11	JK574	Conspecific	0	52	66	380	1	2	1	0	0	0	0	all	7	absent	0	0
540	MT9940	dpl-1	11	JK574	Conspecific	0	52	66	380	2	3	1	0	0	0	0	all	7	absent	0	0
541	MT9940	dpl-1	11	JK574	Conspecific	0	52	66	380	1	3	1	0	0	0	0	all	7	absent	0	0
542	MT9940	dpl-1	11	JK574	Conspecific	0	52	66	380	1	2	0	0	0	0	0	prox ut +dist ut	4	absent	0	0
776	MT9940	dpl-1	11	JK574	Conspecific	0	46	69	379	2	3	1	0	0	0	0	all	7	absent	0	0
777	MT9940	dpl-1	11	JK574	Conspecific	0	46	69	379	1	2	1	0	0	0	0	all	7	absent	0	0
778	MT9940	dpl-1	11	JK574	Conspecific	0	46	69	379	1	2	1	0	0	0	0	all	7	absent	0	0
779	MT9940	dpl-1	11	JK574	Conspecific	0	46	69	379	1	2	1	0	0	0	0	all	7	absent	0	0
780	MT9940	dpl-1	11	JK574	Conspecific	0	46	69	379	1	2	1	0	0	0	0	all	7	absent	0	0
781	MT9940	dpl-1	11	JK574	Conspecific	0	46	69	379	1	3	0	0	0	0	0	prox ut +dist ut	4	absent	0	0
1106	MT9940	dpl-1	11	JK574	Conspecific	0	49	79	391	1	2	1	0	0	0	0	all	7	absent	0	0
1107	MT9940	dpl-1	11	JK574	Conspecific	0	49	79	391	1	2	1	0	0	0	0	all	7	absent	0	0
1108	MT9940	dpl-1	11	JK574	Conspecific	0	49	79	391	1	2	1	0	0	0	0	all	7	absent	0	0
1109	MT9940	dpl-1	11	JK574	Conspecific	0	49	79	391	1	2	1	0	0	0	0	all	7	absent	0	0
1110	MT9940	dpl-1	11	JK574	Conspecific	0	49	79	391	1	2	1	0	0	0	0	all	7	absent	0	0
1111	MT9940	dpl-1	11	JK574	Conspecific	0	49	79	391	1	2	1	0	0	0	0	all	7	absent	0	0
1112	MT9940	dpl-1	11	JK574	Conspecific	0	49	79	391	1	2	1	0	0	0	0	all	7	absent	0	0
1113	MT9940	dpl-1	11	JK574	Conspecific	0	49	79	391	1	2	1	0	0	0	0	all	7	absent	0	0
182	MT11691	efl-1	13	JK574	Conspecific	0	44	34	342	2	3	0	0	0	0	0	prox ut +dist ut	4	absent	0	0
183	MT11691	efl-1	13	JK574	Conspecific	0	44	34	342	3	3	1	0	0	0	0	all	7	absent	0	0
184	MT11691	efl-1	13	JK574	Conspecific	0	44	34	342	2	3	2	0	0	0	0	all	7	absent	0	0
185	MT11691	efl-1	13	JK574	Conspecific	0	44	34	342	3	3	1	0	0	0	0	all	7	absent	0	0
186	MT11691	efl-1	13	JK574	Conspecific	0	44	34	342	2	3	2	0	0	0	0	all	7	absent	0	0
281	MT11691	efl-1	13	JK574	Conspecific	0	43	68	349	1	3	0	0	0	0	0	prox ut +dist ut	4	absent	0	0
282	MT11691	efl-1	13	JK574	Conspecific	0	43	68	349	1	3	1	0	0	0	0	all	7	absent	0	0
283	MT11691	efl-1	13	JK574	Conspecific	0	43	68	349	1	3	1	0	0	0	0	all	7	absent	0	0
284	MT11691	efl-1	13	JK574	Conspecific	0	43	68	349	1	3	0	0	0	0	0	prox ut +dist ut	4	absent	0	0
285	MT11691	efl-1	13	JK574	Conspecific	0	43	68	349	1	3	1	0	0	0	0	all	7	absent	0	0
286	MT11691	efl-1	13	JK574	Conspecific	0	43	68	349	1	3	1	0	0	0	0	all	7	absent	0	0
287	MT11691	efl-1	13	JK574	Conspecific	0	43	68	349	1	3	0	0	0	0	0	prox ut +dist ut	4	absent	0	0
288	MT11691	efl-1	13	JK574	Conspecific	0	43	68	349	1	3	2	0	0	0	0	all	7	absent	0	0
289	MT11691	efl-1	13	JK574	Conspecific	0	43	68	349	1	3	1	0	0	0	0	all	7	absent	0	0
825	MT11691	efl-1	13	JK574	Conspecific	0	43	71	438	1	1	1	0	0	0	0	all	7	absent	0	0
826	MT11691	efl-1	13	JK574	Conspecific	0	43	71	438	2	3	1	0	0	0	0	all	7	absent	0	0
827	MT11691	efl-1	13	JK574	Conspecific	0	43	71	438	2	3	1	0	0	0	0	all	7	absent	0	0
828	MT11691	efl-1	13	JK574	Conspecific	0	43	71	438	1	2	1	0	0	0	0	all	7	absent	0	0
829	MT11691	efl-1	13	JK574	Conspecific	0	43	71	438	1	3	0	0	0	0	0	prox ut +dist ut	4	absent	0	0
830	MT11691	efl-1	13	JK574	Conspecific	0	43	71	438	2	3	0	0	0	0	0	prox ut +dist ut	4	absent	0	0
831	MT11691	efl-1	13	JK574	Conspecific	0	43	71	438	1	2	1	0	0	0	0	all	7	absent	0	0
832	MT11691	efl-1	13	JK574	Conspecific	0	43	71	438	1	3	1	0	0	0	0	all	7	absent	0	0
833	MT11691	efl-1	13	JK574	Conspecific	0	43	71	438	2	3	0	0	0	0	0	prox ut +dist ut	4	absent	0	0
834	MT11691	efl-1	13	JK574	Conspecific	0	43	71	438	2	3	2	0	0	0	0	all	7	absent	0	0
835	MT11691	efl-1	13	JK574	Conspecific	0	43	71	438	2	3	0	0	0	0	0	prox ut +dist ut	4	absent	0	0
223	PS2368	itr-1(sy327)	14	JK574	Conspecific	0	41	38	400	1	2	1	0	0	0	0	all	7	absent	0	0
224	PS2368	itr-1(sy327)	14	JK574	Conspecific	0	41	38	400	3	3	1	0	0	0	0	all	7	absent	0	0
225	PS2368	itr-1(sy327)	14	JK574	Conspecific	0	41	38	400	1	2	0	0	0	0	0	prox ut +dist ut	4	absent	0	0
226	PS2368	itr-1(sy327)	14	JK574	Conspecific	0	41	38	400	1	3	0	0	0	0	0	prox ut +dist ut	4	absent	0	0
227	PS2368	itr-1(sy327)	14	JK574	Conspecific	0	41	38	400	2	3	0	0	0	0	0	prox ut +dist ut	4	absent	0	0
589	PS2368	itr-1(sy327)	14	JK574	Conspecific	0	49	71	425	2	3	1	0	0	0	0	all	7	absent	0	0
592	PS2368	itr-1(sy327)	14	JK574	Conspecific	0	49	71	425	0	2	0	0	0	0	0	dist ut only	2	absent	0	0
593	PS2368	itr-1(sy327)	14	JK574	Conspecific	0	49	71	425	1	2	1	0	0	0	0	all	7	absent	0	0
594	PS2368	itr-1(sy327)	14	JK574	Conspecific	0	49	71	425	1	2	1	0	0	0	0	all	7	absent	0	0
595	PS2368	itr-1(sy327)	14	JK574	Conspecific	0	49	71	425	1	2	1	0	0	0	0	all	7	absent	0	0
596	PS2368	itr-1(sy327)	14	JK574	Conspecific	0	49	71	425	0	2	0	0	0	0	0	dist ut only	2	absent	0	0
597	PS2368	itr-1(sy327)	14	JK574	Conspecific	0	49	71	425	1	3	1	0	0	0	0	all	7	absent	0	0
598	PS2368	itr-1(sy327)	14	JK574	Conspecific	0	49	71	425	1	2	0	0	0	0	0	prox ut +dist ut	4	absent	0	0
693	PS2368	itr-1(sy327)	14	JK574	Conspecific	0	46	79	327	2	3	2	0	0	0	0	all	7	absent	0	0
694	PS2368	itr-1(sy327)	14	JK574	Conspecific	0	46	79	327	2	3	1	0	0	0	0	all	7	absent	0	0
695	PS2368	itr-1(sy327)	14	JK574	Conspecific	0	46	79	327	3	3	1	0	0	0	0	all	7	absent	0	0
696	PS2368	itr-1(sy327)	14	JK574	Conspecific	0	46	79	327	2	3	2	0	0	0	0	all	7	absent	0	0
697	PS2368	itr-1(sy327)	14	JK574	Conspecific	0	46	79	327	1	2	1	0	0	0	0	all	7	absent	0	0
698	PS2368	itr-1(sy327)	14	JK574	Conspecific	0	46	79	327	2	3	2	0	0	0	0	all	7	absent	0	0
699	PS2368	itr-1(sy327)	14	JK574	Conspecific	0	46	79	327	1	2	1	0	0	0	0	all	7	absent	0	0
700	PS2368	itr-1(sy327)	14	JK574	Conspecific	0	46	79	327	1	3	1	0	0	0	0	all	7	absent	0	0
701	PS2368	itr-1(sy327)	14	JK574	Conspecific	0	46	79	327	2	3	1	0	0	0	0	all	7	absent	0	0
702	PS2368	itr-1(sy327)	14	JK574	Conspecific	0	46	79	327	2	3	1	0	0	0	0	all	7	absent	0	0
703	PS2368	itr-1(sy327)	14	JK574	Conspecific	0	46	79	327	1	1	1	0	0	0	0	all	7	absent	0	0
139	PS3653	ipp-5	15	JK574	Conspecific	0	41	35	309	2	3	1	0	0	0	0	all	7	absent	0	0
140	PS3653	ipp-5	15	JK574	Conspecific	0	41	35	309	2	3	1	0	0	0	0	all	7	absent	0	0
141	PS3653	ipp-5	15	JK574	Conspecific	0	41	35	309	0	3	1	0	0	0	0	dist ut +sperma	6	absent	0	0
142	PS3653	ipp-5	15	JK574	Conspecific	0	41	35	309	1	3	1	0	0	0	0	all	7	absent	0	0
143	PS3653	ipp-5	15	JK574	Conspecific	0	41	35	309	2	3	1	0	0	0	0	all	7	absent	0	0
551	PS3653	ipp-5	15	JK574	Conspecific	0	51	68	391	1	2	1	0	0	0	0	all	7	absent	0	0
552	PS3653	ipp-5	15	JK574	Conspecific	0	51	68	391	1	3	1	0	0	0	0	all	7	absent	0	0
553	PS3653	ipp-5	15	JK574	Conspecific	0	51	68	391	1	3	2	0	0	0	0	all	7	absent	0	0
554	PS3653	ipp-5	15	JK574	Conspecific	0	51	68	391	2	3	0	0	0	0	0	prox ut +dist ut	4	absent	0	0
555	PS3653	ipp-5	15	JK574	Conspecific	0	51	68	391	1	2	0	0	0	0	0	prox ut +dist ut	4	absent	0	0
556	PS3653	ipp-5	15	JK574	Conspecific	0	51	68	391	1	2	1	0	0	0	0	all	7	absent	0	0
557	PS3653	ipp-5	15	JK574	Conspecific	0	51	68	391	1	3	1	0	0	0	0	all	7	absent	0	0
558	PS3653	ipp-5	15	JK574	Conspecific	0	51	68	391	1	1	1	0	0	0	0	all	7	absent	0	0
888	PS3653	ipp-5	15	JK574	Conspecific	0	46	71	303	1	2	0	0	0	0	0	prox ut +dist ut	4	absent	0	0
889	PS3653	ipp-5	15	JK574	Conspecific	0	46	71	303	1	2	1	0	0	0	0	all	7	absent	0	0
890	PS3653	ipp-5	15	JK574	Conspecific	0	46	71	303	2	3	2	0	0	0	0	all	7	absent	0	0
891	PS3653	ipp-5	15	JK574	Conspecific	0	46	71	303	2	2	1	0	0	0	0	all	7	absent	0	0
892	PS3653	ipp-5	15	JK574	Conspecific	0	46	71	303	2	3	1	0	0	0	0	all	7	absent	0	0
893	PS3653	ipp-5	15	JK574	Conspecific	0	46	71	303	2	3	1	0	0	0	0	all	7	absent	0	0
1637	PS3653	ipp-5	15	JK574	Conspecific	0	41	73	403	2	2	1	0	0	0	0	all	7	absent	0	0
1638	PS3653	ipp-5	15	JK574	Conspecific	0	41	73	403	2	2	2	0	0	0	0	all	7	absent	0	0
1639	PS3653	ipp-5	15	JK574	Conspecific	0	41	73	403	1	2	2	0	0	0	0	all	7	absent	0	0
1640	PS3653	ipp-5	15	JK574	Conspecific	0	41	73	403	2	2	2	0	0	0	0	all	7	absent	0	0
1641	PS3653	ipp-5	15	JK574	Conspecific	0	41	73	403	1	2	1	0	0	0	0	all	7	absent	0	0
1642	PS3653	ipp-5	15	JK574	Conspecific	0	41	73	403	2	3	2	0	0	0	0	all	7	absent	0	0
1643	PS3653	ipp-5	15	JK574	Conspecific	0	41	73	403	2	2	1	0	0	0	0	all	7	absent	0	0
1644	PS3653	ipp-5	15	JK574	Conspecific	0	41	73	403	2	3	2	0	0	0	0	all	7	absent	0	0
1645	PS3653	ipp-5	15	JK574	Conspecific	0	41	73	403	2	2	1	0	0	0	0	all	7	absent	0	0
1646	PS3653	ipp-5	15	JK574	Conspecific	0	41	73	403	2	2	2	0	0	0	0	all	7	absent	0	0
1647	PS3653	ipp-5	15	JK574	Conspecific	0	41	73	403	1	2	0	0	0	0	0	prox ut +dist ut	4	absent	0	0
1648	PS3653	ipp-5	15	JK574	Conspecific	0	41	73	403	2	3	2	0	0	0	0	all	7	absent	0	0
1649	PS3653	ipp-5	15	JK574	Conspecific	0	41	73	403	1	2	2	0	0	0	0	all	7	absent	0	0
1650	PS3653	ipp-5	15	JK574	Conspecific	0	41	73	403	2	2	1	0	0	0	0	all	7	absent	0	0
1651	PS3653	ipp-5	15	JK574	Conspecific	0	41	73	403	2	2	1	0	0	0	0	all	7	absent	0	0
1652	PS3653	ipp-5	15	JK574	Conspecific	0	41	73	403	2	2	1	0	0	0	0	all	7	absent	0	0
117	PS4112	plc-1	16	JK574	Conspecific	0	50	41	402	1	2	0	0	0	0	0	prox ut +dist ut	4	absent	0	0
118	PS4112	plc-1	16	JK574	Conspecific	0	50	41	402	2	3	2	0	0	0	0	all	7	absent	0	0
119	PS4112	plc-1	16	JK574	Conspecific	0	50	41	402	2	3	1	0	0	0	0	all	7	absent	0	0
120	PS4112	plc-1	16	JK574	Conspecific	0	50	41	402	1	3	2	0	0	0	0	all	7	absent	0	0
121	PS4112	plc-1	16	JK574	Conspecific	0	50	41	402	2	3	2	0	0	0	0	all	7	absent	0	0
122	PS4112	plc-1	16	JK574	Conspecific	0	50	41	402	1	3	0	0	0	0	0	prox ut +dist ut	4	absent	0	0
661	PS4112	plc-1	16	JK574	Conspecific	0	47	79	292	1	3	2	0	0	0	0	all	7	absent	0	0
662	PS4112	plc-1	16	JK574	Conspecific	0	47	79	292	2	3	1	0	0	0	0	all	7	absent	0	0
663	PS4112	plc-1	16	JK574	Conspecific	0	47	79	292	0	2	1	0	0	0	0	dist ut +sperma	6	absent	0	0
664	PS4112	plc-1	16	JK574	Conspecific	0	47	79	292	1	2	2	0	0	0	0	all	7	absent	0	0
665	PS4112	plc-1	16	JK574	Conspecific	0	47	79	292	2	2	2	0	0	0	0	all	7	absent	0	0
666	PS4112	plc-1	16	JK574	Conspecific	0	47	79	292	3	3	2	0	0	0	0	all	7	absent	0	0
667	PS4112	plc-1	16	JK574	Conspecific	0	47	79	292	2	3	1	0	0	0	0	all	7	absent	0	0
668	PS4112	plc-1	16	JK574	Conspecific	0	47	79	292	2	3	2	0	0	0	0	all	7	absent	0	0
863	PS4112	plc-1	16	JK574	Conspecific	0	47	73	269	2	3	2	0	0	0	0	all	7	absent	0	0
864	PS4112	plc-1	16	JK574	Conspecific	0	47	73	269	2	3	1	0	0	0	0	all	7	absent	0	0
865	PS4112	plc-1	16	JK574	Conspecific	0	47	73	269	1	2	1	0	0	0	0	all	7	absent	0	0
866	PS4112	plc-1	16	JK574	Conspecific	0	47	73	269	1	2	1	0	0	0	0	all	7	absent	0	0
867	PS4112	plc-1	16	JK574	Conspecific	0	47	73	269	1	2	1	0	0	0	0	all	7	absent	0	0
868	PS4112	plc-1	16	JK574	Conspecific	0	47	73	269	2	3	0	0	0	0	0	prox ut +dist ut	4	absent	0	0
869	PS4112	plc-1	16	JK574	Conspecific	0	47	73	269	2	3	2	0	0	0	0	all	7	absent	0	0
47	PS4330	spe-41	17	JK574	Conspecific	0	46	40	427	1	3	0	0	0	0	0	prox ut +dist ut	4	absent	0	0
48	PS4330	spe-41	17	JK574	Conspecific	0	46	40	427	0	2	0	0	0	0	0	dist ut only	2	absent	0	0
49	PS4330	spe-41	17	JK574	Conspecific	0	46	40	427	2	3	2	0	0	0	0	all	7	absent	0	0
50	PS4330	spe-41	17	JK574	Conspecific	0	46	40	427	2	3	2	0	0	0	0	all	7	absent	0	0
51	PS4330	spe-41	17	JK574	Conspecific	0	46	40	427	2	2	0	0	0	0	0	prox ut +dist ut	4	absent	0	0
52	PS4330	spe-41	17	JK574	Conspecific	0	46	40	427	2	3	0	0	0	0	0	prox ut +dist ut	4	absent	0	0
53	PS4330	spe-41	17	JK574	Conspecific	0	46	40	427	0	2	0	0	0	0	0	dist ut only	2	absent	0	0
54	PS4330	spe-41	17	JK574	Conspecific	0	46	40	427	0	2	1	0	0	0	0	dist ut +sperma	6	absent	0	0
607	PS4330	spe-41	17	JK574	Conspecific	0	49	72	437	1	2	1	0	0	0	0	all	7	absent	0	0
608	PS4330	spe-41	17	JK574	Conspecific	0	49	72	437	2	2	1	0	0	0	0	all	7	absent	0	0
609	PS4330	spe-41	17	JK574	Conspecific	0	49	72	437	1	2	1	0	0	0	0	all	7	absent	0	0
610	PS4330	spe-41	17	JK574	Conspecific	0	49	72	437	1	1	1	0	0	0	0	all	7	absent	0	0
908	PS4330	spe-41	17	JK574	Conspecific	0	45	72	328	2	2	1	0	0	0	0	all	7	absent	0	0
909	PS4330	spe-41	17	JK574	Conspecific	0	45	72	328	2	2	1	0	0	0	0	all	7	absent	0	0
910	PS4330	spe-41	17	JK574	Conspecific	0	45	72	328	2	3	1	0	0	0	0	all	7	absent	0	0
1189	PS4330	spe-41	17	JK574	Conspecific	0	43	81	413	2	2	1	0	0	0	0	all	7	absent	0	0
1190	PS4330	spe-41	17	JK574	Conspecific	0	43	81	413	2	2	1	0	0	0	0	all	7	absent	0	0
1191	PS4330	spe-41	17	JK574	Conspecific	0	43	81	413	2	2	1	0	0	0	0	all	7	absent	0	0
1193	PS4330	spe-41	17	JK574	Conspecific	0	43	81	413	2	2	1	0	0	0	0	all	7	absent	0	0
1194	PS4330	spe-41	17	JK574	Conspecific	0	43	81	413	2	2	1	0	0	0	0	all	7	absent	0	0
1195	PS4330	spe-41	17	JK574	Conspecific	0	43	81	413	2	2	1	0	0	0	0	all	7	absent	0	0
1196	PS4330	spe-41	17	JK574	Conspecific	0	43	81	413	2	2	1	0	0	0	0	all	7	absent	0	0
1197	PS4330	spe-41	17	JK574	Conspecific	0	43	81	413	2	2	1	0	0	0	0	all	7	absent	0	0
1198	PS4330	spe-41	17	JK574	Conspecific	0	43	81	413	2	2	1	0	0	0	0	all	7	absent	0	0
1199	PS4330	spe-41	17	JK574	Conspecific	0	43	81	413	2	2	1	0	0	0	0	all	7	absent	0	0
1200	PS4330	spe-41	17	JK574	Conspecific	0	43	81	413	2	2	1	0	0	0	0	all	7	absent	0	0
70	RB1353	spv-1	18	JK574	Conspecific	0	49	41	449	2	3	1	0	0	0	0	all	7	absent	0	0
71	RB1353	spv-1	18	JK574	Conspecific	0	49	41	449	2	3	1	0	0	0	0	all	7	absent	0	0
72	RB1353	spv-1	18	JK574	Conspecific	0	49	41	449	2	3	1	0	0	0	0	all	7	absent	0	0
73	RB1353	spv-1	18	JK574	Conspecific	0	49	41	449	2	3	0	0	0	0	0	prox ut +dist ut	4	absent	0	0
74	RB1353	spv-1	18	JK574	Conspecific	0	49	41	449	1	3	2	0	0	0	0	all	7	absent	0	0
75	RB1353	spv-1	18	JK574	Conspecific	0	49	41	449	1	3	1	0	0	0	0	all	7	absent	0	0
805	RB1353	spv-1	18	JK574	Conspecific	0	44	72	417	2	2	1	0	0	0	0	all	7	absent	0	0
806	RB1353	spv-1	18	JK574	Conspecific	0	44	72	417	2	2	1	0	0	0	0	all	7	absent	0	0
807	RB1353	spv-1	18	JK574	Conspecific	0	44	72	417	1	2	1	0	0	0	0	all	7	absent	0	0
808	RB1353	spv-1	18	JK574	Conspecific	0	44	72	417	2	2	1	0	0	0	0	all	7	absent	0	0
809	RB1353	spv-1	18	JK574	Conspecific	0	44	72	417	2	3	1	0	0	0	0	all	7	absent	0	0
810	RB1353	spv-1	18	JK574	Conspecific	0	44	72	417	2	2	1	0	0	0	0	all	7	absent	0	0
811	RB1353	spv-1	18	JK574	Conspecific	0	44	72	417	1	1	1	0	0	0	0	all	7	absent	0	0
814	RB1353	spv-1	18	JK574	Conspecific	0	44	72	417	2	2	1	0	0	0	0	all	7	absent	0	0
1596	RB1353	spv-1	18	JK574	Conspecific	0	45	76	370	2	2	1	0	0	0	0	all	7	absent	0	0
1598	RB1353	spv-1	18	JK574	Conspecific	0	45	76	370	2	3	2	0	0	0	0	all	7	absent	0	0
1599	RB1353	spv-1	18	JK574	Conspecific	0	45	76	370	2	2	2	0	0	0	0	all	7	absent	0	0
1600	RB1353	spv-1	18	JK574	Conspecific	0	45	76	370	2	3	0	0	0	0	0	prox ut +dist ut	4	absent	0	0
1602	RB1353	spv-1	18	JK574	Conspecific	0	45	76	370	2	2	1	0	0	0	0	all	7	absent	0	0
1603	RB1353	spv-1	18	JK574	Conspecific	0	45	76	370	2	2	2	0	0	0	0	all	7	absent	0	0
1606	RB1353	spv-1	18	JK574	Conspecific	0	45	76	370	2	2	0	0	0	0	0	prox ut +dist ut	4	absent	0	0
1607	RB1353	spv-1	18	JK574	Conspecific	0	45	76	370	2	2	2	0	0	0	0	all	7	absent	0	0
1608	RB1353	spv-1	18	JK574	Conspecific	0	45	76	370	1	1	1	0	0	0	0	all	7	absent	0	0
1609	RB1353	spv-1	18	JK574	Conspecific	0	45	76	370	2	2	0	0	0	0	0	prox ut +dist ut	4	absent	0	0
1610	RB1353	spv-1	18	JK574	Conspecific	0	45	76	370	2	2	1	0	0	0	0	all	7	absent	0	0
1611	RB1353	spv-1	18	JK574	Conspecific	0	45	76	370	2	2	1	0	0	0	0	all	7	absent	0	0
1612	RB1353	spv-1	18	JK574	Conspecific	0	45	76	370	2	2	2	0	0	0	0	all	7	absent	0	0
1613	RB1353	spv-1	18	JK574	Conspecific	0	45	76	370	2	2	2	0	0	0	0	all	7	absent	0	0
190	RB1823	gst-4	19	JK574	Conspecific	0	43	34	356	1	3	1	0	0	0	0	all	7	absent	0	0
191	RB1823	gst-4	19	JK574	Conspecific	0	43	34	356	2	3	2	0	0	0	0	all	7	absent	0	0
192	RB1823	gst-4	19	JK574	Conspecific	0	43	34	356	2	3	0	0	0	0	0	prox ut +dist ut	4	absent	0	0
193	RB1823	gst-4	19	JK574	Conspecific	0	43	34	356	1	3	1	0	0	0	0	all	7	absent	0	0
194	RB1823	gst-4	19	JK574	Conspecific	0	43	34	356	1	3	2	0	0	0	0	all	7	absent	0	0
195	RB1823	gst-4	19	JK574	Conspecific	0	43	34	356	3	3	1	0	0	0	0	all	7	absent	0	0
375	RB1823	gst-4	19	JK574	Conspecific	0	47	71	350	1	3	1	0	0	0	0	all	7	absent	0	0
377	RB1823	gst-4	19	JK574	Conspecific	0	47	71	350	3	3	2	0	0	0	0	all	7	absent	0	0
378	RB1823	gst-4	19	JK574	Conspecific	0	47	71	350	2	3	1	0	0	0	0	all	7	absent	0	0
379	RB1823	gst-4	19	JK574	Conspecific	0	47	71	350	1	3	0	0	0	0	0	prox ut +dist ut	4	absent	0	0
380	RB1823	gst-4	19	JK574	Conspecific	0	47	71	350	1	3	0	0	0	0	0	prox ut +dist ut	4	absent	0	0
381	RB1823	gst-4	19	JK574	Conspecific	0	47	71	350	1	2	2	0	0	0	0	all	7	absent	0	0
382	RB1823	gst-4	19	JK574	Conspecific	0	47	71	350	2	2	1	0	0	0	0	all	7	absent	0	0
383	RB1823	gst-4	19	JK574	Conspecific	0	47	71	350	1	3	2	0	0	0	0	all	7	absent	0	0
761	RB1823	gst-4	19	JK574	Conspecific	0	46	70	361	1	2	1	0	0	0	0	all	7	absent	0	0
762	RB1823	gst-4	19	JK574	Conspecific	0	46	70	361	2	3	2	0	0	0	0	all	7	absent	0	0
763	RB1823	gst-4	19	JK574	Conspecific	0	46	70	361	1	3	2	0	0	0	0	all	7	absent	0	0
764	RB1823	gst-4	19	JK574	Conspecific	0	46	70	361	1	2	1	0	0	0	0	all	7	absent	0	0
765	RB1823	gst-4	19	JK574	Conspecific	0	46	70	361	1	2	1	0	0	0	0	all	7	absent	0	0
766	RB1823	gst-4	19	JK574	Conspecific	0	46	70	361	1	3	2	0	0	0	0	all	7	absent	0	0
768	RB1823	gst-4	19	JK574	Conspecific	0	46	70	361	1	1	1	0	0	0	0	all	7	absent	0	0
769	RB1823	gst-4	19	JK574	Conspecific	0	46	70	361	1	1	1	0	0	0	0	all	7	absent	0	0
770	RB1823	gst-4	19	JK574	Conspecific	0	46	70	361	1	3	2	0	0	0	0	all	7	absent	0	0
473	SL1138	spe-42	20	JK574	Conspecific	0	47	71	373	1	2	1	0	0	0	0	all	7	absent	0	0
474	SL1138	spe-42	20	JK574	Conspecific	0	47	71	373	1	2	0	0	0	0	0	prox ut +dist ut	4	absent	0	0
475	SL1138	spe-42	20	JK574	Conspecific	0	47	71	373	1	2	1	0	0	0	0	all	7	absent	0	0
476	SL1138	spe-42	20	JK574	Conspecific	0	47	71	373	1	3	1	0	0	0	0	all	7	absent	0	0
477	SL1138	spe-42	20	JK574	Conspecific	0	47	71	373	1	3	0	0	0	0	0	prox ut +dist ut	4	absent	0	0
478	SL1138	spe-42	20	JK574	Conspecific	0	47	71	373	1	2	0	0	0	0	0	prox ut +dist ut	4	absent	0	0
479	SL1138	spe-42	20	JK574	Conspecific	0	47	71	373	2	3	0	0	0	0	0	prox ut +dist ut	4	absent	0	0
480	SL1138	spe-42	20	JK574	Conspecific	0	47	71	373	2	3	1	0	0	0	0	all	7	absent	0	0
481	SL1138	spe-42	20	JK574	Conspecific	0	47	71	373	1	2	0	0	0	0	0	prox ut +dist ut	4	absent	0	0
482	SL1138	spe-42	20	JK574	Conspecific	0	47	71	373	1	2	1	0	0	0	0	all	7	absent	0	0
1079	SL1138	spe-42	20	JK574	Conspecific	0	50	81	369	2	2	0	0	0	0	0	prox ut +dist ut	4	absent	0	0
1080	SL1138	spe-42	20	JK574	Conspecific	0	50	81	369	2	3	1	0	0	0	0	all	7	absent	0	0
1081	SL1138	spe-42	20	JK574	Conspecific	0	50	81	369	2	2	1	0	0	0	0	all	7	absent	0	0
1082	SL1138	spe-42	20	JK574	Conspecific	0	50	81	369	3	3	1	0	0	0	0	all	7	absent	0	0
1083	SL1138	spe-42	20	JK574	Conspecific	0	50	81	369	2	3	1	0	0	0	0	all	7	absent	0	0
1084	SL1138	spe-42	20	JK574	Conspecific	0	50	81	369	2	2	1	0	0	0	0	all	7	absent	0	0
1085	SL1138	spe-42	20	JK574	Conspecific	0	50	81	369	2	3	2	0	0	0	0	all	7	absent	0	0
1086	SL1138	spe-42	20	JK574	Conspecific	0	50	81	369	1	2	2	0	0	0	0	all	7	absent	0	0
1087	SL1138	spe-42	20	JK574	Conspecific	0	50	81	369	2	2	2	0	0	0	0	all	7	absent	0	0
1088	SL1138	spe-42	20	JK574	Conspecific	0	50	81	369	1	2	1	0	0	0	0	all	7	absent	0	0
1344	SL1138	spe-42	20	JK574	Conspecific	0	48	85	431	2	2	2	0	0	0	0	all	7	absent	0	0
1345	SL1138	spe-42	20	JK574	Conspecific	0	48	85	431	1	2	1	0	0	0	0	all	7	absent	0	0
1346	SL1138	spe-42	20	JK574	Conspecific	0	48	85	431	2	3	2	0	0	0	0	all	7	absent	0	0
1347	SL1138	spe-42	20	JK574	Conspecific	0	48	85	431	2	2	2	0	0	0	0	all	7	absent	0	0
1348	SL1138	spe-42	20	JK574	Conspecific	0	48	85	431	2	2	2	0	0	0	0	all	7	absent	0	0
1349	SL1138	spe-42	20	JK574	Conspecific	0	48	85	431	2	3	2	0	0	0	0	all	7	absent	0	0
1350	SL1138	spe-42	20	JK574	Conspecific	0	48	85	431	2	2	2	0	0	0	0	all	7	absent	0	0
1351	SL1138	spe-42	20	JK574	Conspecific	0	48	85	431	2	2	1	0	0	0	0	all	7	absent	0	0
1352	SL1138	spe-42	20	JK574	Conspecific	0	48	85	431	2	2	1	0	0	0	0	all	7	absent	0	0
246	TX183	oma-1,2	21	JK574	Conspecific	0	45	68	308	1	3	2	0	0	0	0	all	7	absent	0	0
248	TX183	oma-1,2	21	JK574	Conspecific	0	45	68	308	2	3	2	0	0	0	0	all	7	absent	0	0
249	TX183	oma-1,2	21	JK574	Conspecific	0	45	68	308	1	2	2	0	0	0	0	all	7	absent	0	0
521	TX183	oma-1,2	21	JK574	Conspecific	0	44	71	419	1	3	2	0	0	0	0	all	7	absent	0	0
975	TX183	oma-1,2	21	JK574	Conspecific	0	47	75	342	3	3	2	0	0	0	0	all	7	absent	0	0
976	TX183	oma-1,2	21	JK574	Conspecific	0	47	75	342	3	3	2	0	0	0	0	all	7	absent	0	0
977	TX183	oma-1,2	21	JK574	Conspecific	0	47	75	342	3	3	2	0	0	0	0	all	7	absent	0	0
978	TX183	oma-1,2	21	JK574	Conspecific	0	47	75	342	2	2	1	0	0	0	0	all	7	absent	0	0
1127	TX183	oma-1,2	21	JK574	Conspecific	0	50	82	336	2	2	1	0	0	0	0	all	7	absent	0	0
1129	TX183	oma-1,2	21	JK574	Conspecific	0	50	82	336	2	1	0	0	0	0	0	prox ut +dist ut	4	absent	0	0
1130	TX183	oma-1,2	21	JK574	Conspecific	0	50	82	336	2	2	0	0	0	0	0	prox ut +dist ut	4	absent	0	0
1131	TX183	oma-1,2	21	JK574	Conspecific	0	50	82	336	2	2	1	0	0	0	0	all	7	absent	0	0
123	JT73	itr-1(sa73)	22	JK574	Conspecific	0	49	42	408	2	3	1	0	0	0	0	all	7	absent	0	0
124	JT73	itr-1(sa73)	22	JK574	Conspecific	0	49	42	408	1	2	0	0	0	0	0	prox ut +dist ut	4	absent	0	0
125	JT73	itr-1(sa73)	22	JK574	Conspecific	0	49	42	408	2	3	2	0	0	0	0	all	7	absent	0	0
126	JT73	itr-1(sa73)	22	JK574	Conspecific	0	49	42	408	1	2	0	0	0	0	0	prox ut +dist ut	4	absent	0	0
128	JT73	itr-1(sa73)	22	JK574	Conspecific	0	49	42	408	0	3	1	0	0	0	0	dist ut +sperma	6	absent	0	0
615	JT73	itr-1(sa73)	22	JK574	Conspecific	0	49	72	452	2	3	1	0	0	0	0	all	7	absent	0	0
618	JT73	itr-1(sa73)	22	JK574	Conspecific	0	49	72	452	1	2	2	0	0	0	0	all	7	absent	0	0
619	JT73	itr-1(sa73)	22	JK574	Conspecific	0	49	72	452	1	2	1	0	0	0	0	all	7	absent	0	0
620	JT73	itr-1(sa73)	22	JK574	Conspecific	0	49	72	452	2	2	1	0	0	0	0	all	7	absent	0	0
621	JT73	itr-1(sa73)	22	JK574	Conspecific	0	49	72	452	2	2	1	0	0	0	0	all	7	absent	0	0
873	JT73	itr-1(sa73)	22	JK574	Conspecific	0	46	72	287	2	2	1	0	0	0	0	all	7	absent	0	0
875	JT73	itr-1(sa73)	22	JK574	Conspecific	0	46	72	287	1	2	1	0	0	0	0	all	7	absent	0	0
878	JT73	itr-1(sa73)	22	JK574	Conspecific	0	46	72	287	1	2	0	0	0	0	0	prox ut +dist ut	4	absent	0	0
1058	JT73	itr-1(sa73)	22	JK574	Conspecific	0	52	81	348	2	2	1	0	0	0	0	all	7	absent	0	0
1059	JT73	itr-1(sa73)	22	JK574	Conspecific	0	52	81	348	2	2	2	0	0	0	0	all	7	absent	0	0
1061	JT73	itr-1(sa73)	22	JK574	Conspecific	0	52	81	348	2	2	1	0	0	0	0	all	7	absent	0	0
1062	JT73	itr-1(sa73)	22	JK574	Conspecific	0	52	81	348	2	2	1	0	0	0	0	all	7	absent	0	0
1063	JT73	itr-1(sa73)	22	JK574	Conspecific	0	52	81	348	2	2	1	0	0	0	0	all	7	absent	0	0
1064	JT73	itr-1(sa73)	22	JK574	Conspecific	0	52	81	348	2	2	1	0	0	0	0	all	7	absent	0	0
1065	JT73	itr-1(sa73)	22	JK574	Conspecific	0	52	81	348	2	2	2	0	0	0	0	all	7	absent	0	0
1068	JT73	itr-1(sa73)	22	JK574	Conspecific	0	52	81	348	1	2	1	0	0	0	0	all	7	absent	0	0
1069	JT73	itr-1(sa73)	22	JK574	Conspecific	0	52	81	348	2	2	0	0	0	0	0	prox ut +dist ut	4	absent	0	0
129	DH1390	rme-2	23	JK574	Conspecific	0	44	42	415	1	2	0	0	0	0	0	prox ut +dist ut	4	absent	0	0
130	DH1390	rme-2	23	JK574	Conspecific	0	44	42	415	2	3	0	0	0	0	0	prox ut +dist ut	4	absent	0	0
131	DH1390	rme-2	23	JK574	Conspecific	0	44	42	415	3	3	0	0	0	0	0	prox ut +dist ut	4	absent	0	0
132	DH1390	rme-2	23	JK574	Conspecific	0	44	42	415	1	1	0	0	0	0	0	prox ut +dist ut	4	absent	0	0
569	DH1390	rme-2	23	JK574	Conspecific	0	50	69	407	2	1	0	0	0	0	0	prox ut +dist ut	4	absent	0	0
570	DH1390	rme-2	23	JK574	Conspecific	0	50	69	407	1	2	1	0	0	0	0	all	7	absent	0	0
571	DH1390	rme-2	23	JK574	Conspecific	0	50	69	407	1	1	0	0	0	0	0	prox ut +dist ut	4	absent	0	0
572	DH1390	rme-2	23	JK574	Conspecific	0	50	69	407	1	1	0	0	0	0	0	prox ut +dist ut	4	absent	0	0
573	DH1390	rme-2	23	JK574	Conspecific	0	50	69	407	1	1	0	0	0	0	0	prox ut +dist ut	4	absent	0	0
574	DH1390	rme-2	23	JK574	Conspecific	0	50	69	407	2	1	0	0	0	0	0	prox ut +dist ut	4	absent	0	0
575	DH1390	rme-2	23	JK574	Conspecific	0	50	69	407	1	2	1	0	0	0	0	all	7	absent	0	0
576	DH1390	rme-2	23	JK574	Conspecific	0	50	69	407	2	2	0	0	0	0	0	prox ut +dist ut	4	absent	0	0
943	DH1390	rme-2	23	JK574	Conspecific	0	52	71	299	2	2	0	0	0	0	0	prox ut +dist ut	4	absent	0	0
944	DH1390	rme-2	23	JK574	Conspecific	0	52	71	299	3	3	1	0	0	0	0	all	7	absent	0	0
945	DH1390	rme-2	23	JK574	Conspecific	0	52	71	299	2	2	0	0	0	0	0	prox ut +dist ut	4	absent	0	0
946	DH1390	rme-2	23	JK574	Conspecific	0	52	71	299	1	2	0	0	0	0	0	prox ut +dist ut	4	absent	0	0
947	DH1390	rme-2	23	JK574	Conspecific	0	52	71	299	3	3	0	0	0	0	0	prox ut +dist ut	4	absent	0	0
948	DH1390	rme-2	23	JK574	Conspecific	0	52	71	299	2	2	1	0	0	0	0	all	7	absent	0	0
949	DH1390	rme-2	23	JK574	Conspecific	0	52	71	299	2	2	1	0	0	0	0	all	7	absent	0	0
950	DH1390	rme-2	23	JK574	Conspecific	0	52	71	299	2	3	1	0	0	0	0	all	7	absent	0	0
951	DH1390	rme-2	23	JK574	Conspecific	0	52	71	299	2	2	1	0	0	0	0	all	7	absent	0	0
952	DH1390	rme-2	23	JK574	Conspecific	0	52	71	299	1	2	1	0	0	0	0	all	7	absent	0	0
1309	BX17	fat-4	24	JK574	Conspecific	0	51	85	410	2	3	1	0	0	0	0	all	7	absent	0	0
1310	BX17	fat-4	24	JK574	Conspecific	0	51	85	410	2	2	2	0	0	0	0	all	7	absent	0	0
1311	BX17	fat-4	24	JK574	Conspecific	0	51	85	410	2	2	1	0	0	0	0	all	7	absent	0	0
1313	BX17	fat-4	24	JK574	Conspecific	0	51	85	410	2	2	2	0	0	0	0	all	7	absent	0	0
1314	BX17	fat-4	24	JK574	Conspecific	0	51	85	410	2	3	2	0	0	0	0	all	7	absent	0	0
1315	BX17	fat-4	24	JK574	Conspecific	0	51	85	410	2	3	2	0	0	0	0	all	7	absent	0	0
1316	BX17	fat-4	24	JK574	Conspecific	0	51	85	410	1	2	2	0	0	0	0	all	7	absent	0	0
1317	BX17	fat-4	24	JK574	Conspecific	0	51	85	410	1	2	2	0	0	0	0	all	7	absent	0	0
1318	BX17	fat-4	24	JK574	Conspecific	0	51	85	410	0	2	1	0	0	0	0	dist ut +sperma	6	absent	0	0
1320	BX17	fat-4	24	JK574	Conspecific	0	51	85	410	2	2	1	0	0	0	0	all	7	absent	0	0
1321	BX17	fat-4	24	JK574	Conspecific	0	51	85	410	2	3	2	0	0	0	0	all	7	absent	0	0
1322	BX17	fat-4	24	JK574	Conspecific	0	51	85	410	2	3	1	0	0	0	0	all	7	absent	0	0
1323	BX17	fat-4	24	JK574	Conspecific	0	51	85	410	1	1	1	0	0	0	0	all	7	absent	0	0
1325	BX17	fat-4	24	JK574	Conspecific	0	51	85	410	2	3	1	0	0	0	0	all	7	absent	0	0
1326	BX17	fat-4	24	JK574	Conspecific	0	51	85	410	2	3	2	0	0	0	0	all	7	absent	0	0
1327	BX17	fat-4	24	JK574	Conspecific	0	51	85	410	2	2	2	0	0	0	0	all	7	absent	0	0
1328	BX17	fat-4	24	JK574	Conspecific	0	51	85	410	1	3	2	0	0	0	0	all	7	absent	0	0
1329	BX17	fat-4	24	JK574	Conspecific	0	51	85	410	0	1	2	0	0	0	0	dist ut +sperma	6	absent	0	0
1331	BX17	fat-4	24	JK574	Conspecific	0	51	85	410	2	2	2	0	0	0	0	all	7	absent	0	0
1332	BX17	fat-4	24	JK574	Conspecific	0	51	85	410	2	3	1	0	0	0	0	all	7	absent	0	0
1419	BX17	fat-4	24	JK574	Conspecific	0	61	78	323	2	2	0	0	0	0	0	prox ut +dist ut	4	absent	0	0
1420	BX17	fat-4	24	JK574	Conspecific	0	61	78	323	1	2	2	0	0	0	0	all	7	absent	0	0
1421	BX17	fat-4	24	JK574	Conspecific	0	61	78	323	2	3	1	0	0	0	0	all	7	absent	0	0
1422	BX17	fat-4	24	JK574	Conspecific	0	61	78	323	2	3	0	0	0	0	0	prox ut +dist ut	4	absent	0	0
1423	BX17	fat-4	24	JK574	Conspecific	0	61	78	323	2	2	1	0	0	0	0	all	7	absent	0	0
1424	BX17	fat-4	24	JK574	Conspecific	0	61	78	323	2	3	1	0	0	0	0	all	7	absent	0	0
1425	BX17	fat-4	24	JK574	Conspecific	0	61	78	323	2	3	1	0	0	0	0	all	7	absent	0	0
1426	BX17	fat-4	24	JK574	Conspecific	0	61	78	323	2	2	0	0	0	0	0	prox ut +dist ut	4	absent	0	0
1427	BX17	fat-4	24	JK574	Conspecific	0	61	78	323	1	2	1	0	0	0	0	all	7	absent	0	0
1428	BX17	fat-4	24	JK574	Conspecific	0	61	78	323	2	2	2	0	0	0	0	all	7	absent	0	0
1226	BX24	fat-1	25	JK574	Conspecific	0	55	84	347	0	0	1	0	0	0	0	sperma only	3	absent	0	0
1227	BX24	fat-1	25	JK574	Conspecific	0	55	84	347	2	3	0	0	0	0	0	prox ut +dist ut	4	absent	0	0
1228	BX24	fat-1	25	JK574	Conspecific	0	55	84	347	1	2	1	0	0	0	0	all	7	absent	0	0
1229	BX24	fat-1	25	JK574	Conspecific	0	55	84	347	2	3	2	0	0	0	0	all	7	absent	0	0
1230	BX24	fat-1	25	JK574	Conspecific	0	55	84	347	2	3	2	0	0	0	0	all	7	absent	0	0
1231	BX24	fat-1	25	JK574	Conspecific	0	55	84	347	1	2	1	0	0	0	0	all	7	absent	0	0
1232	BX24	fat-1	25	JK574	Conspecific	0	55	84	347	2	3	2	0	0	0	0	all	7	absent	0	0
1233	BX24	fat-1	25	JK574	Conspecific	0	55	84	347	2	2	2	0	0	0	0	all	7	absent	0	0
1234	BX24	fat-1	25	JK574	Conspecific	0	55	84	347	2	2	1	0	0	0	0	all	7	absent	0	0
1235	BX24	fat-1	25	JK574	Conspecific	0	55	84	347	1	2	1	0	0	0	0	all	7	absent	0	0
1236	BX24	fat-1	25	JK574	Conspecific	0	55	84	347	3	3	2	0	0	0	0	all	7	absent	0	0
1237	BX24	fat-1	25	JK574	Conspecific	0	55	84	347	1	2	2	0	0	0	0	all	7	absent	0	0
1238	BX24	fat-1	25	JK574	Conspecific	0	55	84	347	2	2	2	0	0	0	0	all	7	absent	0	0
1239	BX24	fat-1	25	JK574	Conspecific	0	55	84	347	1	2	1	0	0	0	0	all	7	absent	0	0
1240	BX24	fat-1	25	JK574	Conspecific	0	55	84	347	1	2	2	0	0	0	0	all	7	absent	0	0
1242	BX24	fat-1	25	JK574	Conspecific	0	55	84	347	1	2	1	0	0	0	0	all	7	absent	0	0
1243	BX24	fat-1	25	JK574	Conspecific	0	55	84	347	0	2	2	0	0	0	0	dist ut +sperma	6	absent	0	0
1244	BX24	fat-1	25	JK574	Conspecific	0	55	84	347	1	2	0	0	0	0	0	prox ut +dist ut	4	absent	0	0
1245	BX24	fat-1	25	JK574	Conspecific	0	55	84	347	1	2	2	0	0	0	0	all	7	absent	0	0
1246	BX24	fat-1	25	JK574	Conspecific	0	55	84	347	1	2	1	0	0	0	0	all	7	absent	0	0
1247	BX24	fat-1	25	JK574	Conspecific	0	55	84	347	1	2	2	0	0	0	0	all	7	absent	0	0
1537	BX24	fat-1	25	JK574	Conspecific	0	53	85	404	2	3	2	0	0	0	0	all	7	absent	0	0
1538	BX24	fat-1	25	JK574	Conspecific	0	53	85	404	2	2	2	0	0	0	0	all	7	absent	0	0
1539	BX24	fat-1	25	JK574	Conspecific	0	53	85	404	2	2	2	0	0	0	0	all	7	absent	0	0
1540	BX24	fat-1	25	JK574	Conspecific	0	53	85	404	2	3	2	0	0	0	0	all	7	absent	0	0
1541	BX24	fat-1	25	JK574	Conspecific	0	53	85	404	2	3	2	0	0	0	0	all	7	absent	0	0
1542	BX24	fat-1	25	JK574	Conspecific	0	53	85	404	2	3	2	0	0	0	0	all	7	absent	0	0
1386	BX26	fat-2	26	JK574	Conspecific	0	58	78	301	2	3	2	0	0	0	0	all	7	absent	0	0
1388	BX26	fat-2	26	JK574	Conspecific	0	58	78	301	2	2	1	0	0	0	0	all	7	absent	0	0
1389	BX26	fat-2	26	JK574	Conspecific	0	58	78	301	2	2	2	0	0	0	0	all	7	absent	0	0
1390	BX26	fat-2	26	JK574	Conspecific	0	58	78	301	1	2	2	0	0	0	0	all	7	absent	0	0
1391	BX26	fat-2	26	JK574	Conspecific	0	58	78	301	1	2	2	0	0	0	0	all	7	absent	0	0
1393	BX26	fat-2	26	JK574	Conspecific	0	58	78	301	2	2	2	0	0	0	0	all	7	absent	0	0
1394	BX26	fat-2	26	JK574	Conspecific	0	58	78	301	2	3	2	0	0	0	0	all	7	absent	0	0
1396	BX26	fat-2	26	JK574	Conspecific	0	58	78	301	3	3	2	0	0	0	0	all	7	absent	0	0
1397	BX26	fat-2	26	JK574	Conspecific	0	58	78	301	2	3	2	0	0	0	0	all	7	absent	0	0
1398	BX26	fat-2	26	JK574	Conspecific	0	58	78	301	1	2	2	0	0	0	0	all	7	absent	0	0
1400	BX26	fat-2	26	JK574	Conspecific	0	58	78	301	2	3	2	0	0	0	0	all	7	absent	0	0
1401	BX26	fat-2	26	JK574	Conspecific	0	58	78	301	1	2	2	0	0	0	0	all	7	absent	0	0
1402	BX26	fat-2	26	JK574	Conspecific	0	58	78	301	1	1	0	0	0	0	0	prox ut +dist ut	4	absent	0	0
1403	BX26	fat-2	26	JK574	Conspecific	0	58	78	301	2	2	2	0	0	0	0	all	7	absent	0	0
1569	BX26	fat-2	26	JK574	Conspecific	0	46	76	337	2	3	2	0	0	0	0	all	7	absent	0	0
1571	BX26	fat-2	26	JK574	Conspecific	0	46	76	337	2	3	2	0	0	0	0	all	7	absent	0	0
1572	BX26	fat-2	26	JK574	Conspecific	0	46	76	337	2	2	2	0	0	0	0	all	7	absent	0	0
1574	BX26	fat-2	26	JK574	Conspecific	0	46	76	337	2	2	0	0	0	0	0	prox ut +dist ut	4	absent	0	0
1575	BX26	fat-2	26	JK574	Conspecific	0	46	76	337	2	2	2	0	0	0	0	all	7	absent	0	0
1576	BX26	fat-2	26	JK574	Conspecific	0	46	76	337	1	2	2	0	0	0	0	all	7	absent	0	0
1577	BX26	fat-2	26	JK574	Conspecific	0	46	76	337	2	2	2	0	0	0	0	all	7	absent	0	0
1579	BX26	fat-2	26	JK574	Conspecific	0	46	76	337	2	2	2	0	0	0	0	all	7	absent	0	0
1580	BX26	fat-2	26	JK574	Conspecific	0	46	76	337	1	2	2	0	0	0	0	all	7	absent	0	0
1583	BX26	fat-2	26	JK574	Conspecific	0	46	76	337	2	2	2	0	0	0	0	all	7	absent	0	0
1584	BX26	fat-2	26	JK574	Conspecific	0	46	76	337	1	2	0	0	0	0	0	prox ut +dist ut	4	absent	0	0
1585	BX26	fat-2	26	JK574	Conspecific	0	46	76	337	1	2	2	0	0	0	0	all	7	absent	0	0
1474	BX30	fat-3	27	JK574	Conspecific	0	55	86	368	1	3	2	0	0	0	0	all	7	absent	0	0
1475	BX30	fat-3	27	JK574	Conspecific	0	55	86	368	2	3	2	0	0	0	0	all	7	absent	0	0
1476	BX30	fat-3	27	JK574	Conspecific	0	55	86	368	2	3	2	0	0	0	0	all	7	absent	0	0
1477	BX30	fat-3	27	JK574	Conspecific	0	55	86	368	2	3	2	0	0	0	0	all	7	absent	0	0
1478	BX30	fat-3	27	JK574	Conspecific	0	55	86	368	2	3	2	0	0	0	0	all	7	absent	0	0
1479	BX30	fat-3	27	JK574	Conspecific	0	55	86	368	2	3	2	0	0	0	0	all	7	absent	0	0
1480	BX30	fat-3	27	JK574	Conspecific	0	55	86	368	2	2	2	0	0	0	0	all	7	absent	0	0
1481	BX30	fat-3	27	JK574	Conspecific	0	55	86	368	0	1	1	0	0	0	0	dist ut +sperma	6	absent	0	0
1482	BX30	fat-3	27	JK574	Conspecific	0	55	86	368	1	2	2	0	0	0	0	all	7	absent	0	0
1483	BX30	fat-3	27	JK574	Conspecific	0	55	86	368	2	3	2	0	0	0	0	all	7	absent	0	0
1484	BX30	fat-3	27	JK574	Conspecific	0	55	86	368	2	2	2	0	0	0	0	all	7	absent	0	0
1485	BX30	fat-3	27	JK574	Conspecific	0	55	86	368	2	3	2	0	0	0	0	all	7	absent	0	0
1486	BX30	fat-3	27	JK574	Conspecific	0	55	86	368	1	3	2	0	0	0	0	all	7	absent	0	0
1487	BX30	fat-3	27	JK574	Conspecific	0	55	86	368	1	2	2	0	0	0	0	all	7	absent	0	0
1488	BX30	fat-3	27	JK574	Conspecific	0	55	86	368	1	2	1	0	0	0	0	all	7	absent	0	0
1489	BX30	fat-3	27	JK574	Conspecific	0	55	86	368	2	3	2	0	0	0	0	all	7	absent	0	0
1492	BX30	fat-3	27	JK574	Conspecific	0	55	86	368	1	2	2	0	0	0	0	all	7	absent	0	0
1493	BX30	fat-3	27	JK574	Conspecific	0	55	86	368	2	3	2	0	0	0	0	all	7	absent	0	0
1494	BX30	fat-3	27	JK574	Conspecific	0	55	86	368	2	3	2	0	0	0	0	all	7	absent	0	0
1495	BX30	fat-3	27	JK574	Conspecific	0	55	86	368	1	2	2	0	0	0	0	all	7	absent	0	0
1496	BX30	fat-3	27	JK574	Conspecific	0	55	86	368	1	3	2	0	0	0	0	all	7	absent	0	0
1497	BX30	fat-3	27	JK574	Conspecific	0	55	86	368	2	3	2	0	0	0	0	all	7	absent	0	0
1498	BX30	fat-3	27	JK574	Conspecific	0	55	86	368	1	3	2	0	0	0	0	all	7	absent	0	0
1499	BX30	fat-3	27	JK574	Conspecific	0	55	86	368	1	3	2	0	0	0	0	all	7	absent	0	0
1265	BX52	fat-1,4	28	JK574	Conspecific	0	54	84	376	2	3	2	0	0	0	0	all	7	absent	0	0
1266	BX52	fat-1,4	28	JK574	Conspecific	0	54	84	376	2	3	2	0	0	0	0	all	7	absent	0	0
1267	BX52	fat-1,4	28	JK574	Conspecific	0	54	84	376	1	2	1	0	0	0	0	all	7	absent	0	0
1268	BX52	fat-1,4	28	JK574	Conspecific	0	54	84	376	1	1	1	0	0	0	0	all	7	absent	0	0
1269	BX52	fat-1,4	28	JK574	Conspecific	0	54	84	376	0	1	1	0	0	0	0	dist ut +sperma	6	absent	0	0
1270	BX52	fat-1,4	28	JK574	Conspecific	0	54	84	376	2	3	2	0	0	0	0	all	7	absent	0	0
1272	BX52	fat-1,4	28	JK574	Conspecific	0	54	84	376	2	2	1	0	0	0	0	all	7	absent	0	0
1273	BX52	fat-1,4	28	JK574	Conspecific	0	54	84	376	2	3	1	0	0	0	0	all	7	absent	0	0
1274	BX52	fat-1,4	28	JK574	Conspecific	0	54	84	376	2	2	1	0	0	0	0	all	7	absent	0	0
1275	BX52	fat-1,4	28	JK574	Conspecific	0	54	84	376	2	3	1	0	0	0	0	all	7	absent	0	0
1276	BX52	fat-1,4	28	JK574	Conspecific	0	54	84	376	2	3	2	0	0	0	0	all	7	absent	0	0
1277	BX52	fat-1,4	28	JK574	Conspecific	0	54	84	376	2	3	2	0	0	0	0	all	7	absent	0	0
1278	BX52	fat-1,4	28	JK574	Conspecific	0	54	84	376	1	3	2	0	0	0	0	all	7	absent	0	0
1279	BX52	fat-1,4	28	JK574	Conspecific	0	54	84	376	2	3	1	0	0	0	0	all	7	absent	0	0
1280	BX52	fat-1,4	28	JK574	Conspecific	0	54	84	376	2	3	1	0	0	0	0	all	7	absent	0	0
1281	BX52	fat-1,4	28	JK574	Conspecific	0	54	84	376	2	2	0	0	0	0	0	prox ut +dist ut	4	absent	0	0
1283	BX52	fat-1,4	28	JK574	Conspecific	0	54	84	376	1	3	2	0	0	0	0	all	7	absent	0	0
1284	BX52	fat-1,4	28	JK574	Conspecific	0	54	84	376	2	2	2	0	0	0	0	all	7	absent	0	0
1285	BX52	fat-1,4	28	JK574	Conspecific	0	54	84	376	2	3	1	0	0	0	0	all	7	absent	0	0
1286	BX52	fat-1,4	28	JK574	Conspecific	0	54	84	376	2	3	1	0	0	0	0	all	7	absent	0	0
1287	BX52	fat-1,4	28	JK574	Conspecific	0	54	84	376	2	3	2	0	0	0	0	all	7	absent	0	0
1288	BX52	fat-1,4	28	JK574	Conspecific	0	54	84	376	2	3	2	0	0	0	0	all	7	absent	0	0
1289	BX52	fat-1,4	28	JK574	Conspecific	0	54	84	376	2	3	2	0	0	0	0	all	7	absent	0	0
1517	BX52	fat-1,4	28	JK574	Conspecific	0	55	87	389	2	2	2	0	0	0	0	all	7	absent	0	0
1518	BX52	fat-1,4	28	JK574	Conspecific	0	55	87	389	2	2	2	0	0	0	0	all	7	absent	0	0
1519	BX52	fat-1,4	28	JK574	Conspecific	0	55	87	389	2	3	2	0	0	0	0	all	7	absent	0	0
1520	BX52	fat-1,4	28	JK574	Conspecific	0	55	87	389	2	2	2	0	0	0	0	all	7	absent	0	0
1521	BX52	fat-1,4	28	JK574	Conspecific	0	55	87	389	2	3	2	0	0	0	0	all	7	absent	0	0
1522	BX52	fat-1,4	28	JK574	Conspecific	0	55	87	389	2	3	2	0	0	0	0	all	7	absent	0	0
1523	BX52	fat-1,4	28	JK574	Conspecific	0	55	87	389	2	2	1	0	0	0	0	all	7	absent	0	0
1525	BX52	fat-1,4	28	JK574	Conspecific	0	55	87	389	2	3	1	0	0	0	0	all	7	absent	0	0
8	N2	wildtype	1	JU1325	Heterospecific	1	48	40	364	1	3	0	0	0	0	0	prox ut +dist ut	4	absent	0	0
9	N2	wildtype	1	JU1325	Heterospecific	1	48	40	364	1	3	2	0	0	0	0	all	7	absent	0	0
10	N2	wildtype	1	JU1325	Heterospecific	1	48	40	364	1	3	0	0	0	0	0	prox ut +dist ut	4	absent	0	0
11	N2	wildtype	1	JU1325	Heterospecific	1	48	40	364	1	3	1	0	0	0	0	all	7	absent	0	0
12	N2	wildtype	1	JU1325	Heterospecific	1	48	40	364	2	3	2	0	0	0	0	all	7	absent	0	0
163	N2	wildtype	1	JU1325	Heterospecific	1	38	37	354	1	3	2	0	0	0	0	all	7	absent	0	0
164	N2	wildtype	1	JU1325	Heterospecific	1	38	37	354	2	3	1	0	0	0	0	all	7	absent	0	0
306	N2	wildtype	1	JU1325	Heterospecific	1	41	68	381	1	2	1	0	0	0	0	all	7	absent	0	0
307	N2	wildtype	1	JU1325	Heterospecific	1	41	68	381	1	3	0	0	0	0	0	prox ut +dist ut	4	absent	0	0
310	N2	wildtype	1	JU1325	Heterospecific	1	41	68	381	2	3	0	0	0	0	0	prox ut +dist ut	4	absent	0	0
311	N2	wildtype	1	JU1325	Heterospecific	1	41	68	381	1	2	1	0	0	0	0	all	7	absent	0	0
717	N2	wildtype	1	JU1325	Heterospecific	1	45	79	369	2	2	1	0	0	0	0	all	7	absent	0	0
719	N2	wildtype	1	JU1325	Heterospecific	1	45	79	369	1	2	1	0	0	0	0	all	7	absent	0	0
726	N2	wildtype	1	JU1325	Heterospecific	1	45	79	369	1	2	2	0	0	0	0	all	7	absent	0	0
1001	N2	wildtype	1	JU1325	Heterospecific	1	48	81	373	2	2	1	0	0	0	0	all	7	absent	0	0
1002	N2	wildtype	1	JU1325	Heterospecific	1	48	81	373	1	2	1	0	0	0	0	all	7	absent	0	0
1356	N2	wildtype	1	JU1325	Heterospecific	1	47	86	437	2	3	2	0	0	0	0	all	7	absent	0	0
1545	N2	wildtype	1	JU1325	Heterospecific	1	52	84	409	2	2	0	0	0	0	0	prox ut +dist ut	4	absent	0	0
1546	N2	wildtype	1	JU1325	Heterospecific	1	52	84	409	2	2	1	0	0	0	0	all	7	absent	0	0
1547	N2	wildtype	1	JU1325	Heterospecific	1	52	84	409	2	2	0	0	0	0	0	prox ut +dist ut	4	absent	0	0
1653	N2	wildtype	1	JU1325	Heterospecific	1	43	71	413	2	2	1	0	0	0	0	all	7	absent	0	0
16	AD186	egg-1	2	JU1325	Heterospecific	1	47	40	385	2	3	0	0	0	0	0	prox ut +dist ut	4	absent	0	0
17	AD186	egg-1	2	JU1325	Heterospecific	1	47	40	385	1	3	0	0	0	0	0	prox ut +dist ut	4	absent	0	0
196	AD186	egg-1	2	JU1325	Heterospecific	1	43	29	370	1	3	1	0	0	0	0	all	7	absent	0	0
639	AD186	egg-1	2	JU1325	Heterospecific	1	48	81	263	2	2	1	0	0	0	0	all	7	absent	0	0
640	AD186	egg-1	2	JU1325	Heterospecific	1	48	81	263	1	2	1	0	0	0	0	all	7	absent	0	0
641	AD186	egg-1	2	JU1325	Heterospecific	1	48	81	263	1	2	1	0	0	0	0	all	7	absent	0	0
642	AD186	egg-1	2	JU1325	Heterospecific	1	48	81	263	2	3	1	0	0	0	0	all	7	absent	0	0
981	AD186	egg-1	2	JU1325	Heterospecific	1	48	79	355	1	1	1	0	0	0	0	all	7	absent	0	0
982	AD186	egg-1	2	JU1325	Heterospecific	1	48	79	355	1	2	1	0	0	0	0	all	7	absent	0	0
984	AD186	egg-1	2	JU1325	Heterospecific	1	48	79	355	2	2	1	0	0	0	0	all	7	absent	0	0
985	AD186	egg-1	2	JU1325	Heterospecific	1	48	79	355	2	2	1	0	0	0	0	all	7	absent	0	0
344	AU98	inx-14	3	JU1325	Heterospecific	1	48	70	324	3	3	2	0	0	0	0	all	7	absent	0	0
345	AU98	inx-14	3	JU1325	Heterospecific	1	48	70	324	3	3	1	0	0	0	0	all	7	absent	0	0
347	AU98	inx-14	3	JU1325	Heterospecific	1	48	70	324	3	3	1	0	0	0	0	all	7	absent	0	0
348	AU98	inx-14	3	JU1325	Heterospecific	1	48	70	324	1	3	1	0	0	0	0	all	7	absent	0	0
349	AU98	inx-14	3	JU1325	Heterospecific	1	48	70	324	1	2	1	0	0	0	0	all	7	absent	0	0
350	AU98	inx-14	3	JU1325	Heterospecific	1	48	70	324	1	3	1	0	0	0	0	all	7	absent	0	0
351	AU98	inx-14	3	JU1325	Heterospecific	1	48	70	324	2	3	1	0	0	0	0	all	7	absent	0	0
353	AU98	inx-14	3	JU1325	Heterospecific	1	48	70	324	1	3	2	0	0	0	0	all	7	absent	0	0
356	AU98	inx-14	3	JU1325	Heterospecific	1	48	70	324	1	3	2	0	0	0	0	all	7	absent	0	0
670	AU98	inx-14	3	JU1325	Heterospecific	1	47	80	300	0	3	1	0	0	0	0	dist ut +sperma	6	absent	0	0
672	AU98	inx-14	3	JU1325	Heterospecific	1	47	80	300	3	3	1	0	0	0	0	all	7	absent	0	0
674	AU98	inx-14	3	JU1325	Heterospecific	1	47	80	300	1	2	1	0	0	0	0	all	7	absent	0	0
408	BA671	spe-9	4	JU1325	Heterospecific	1	45	72	384	2	3	0	0	0	0	0	prox ut +dist ut	4	absent	0	0
1137	BA671	spe-9	4	JU1325	Heterospecific	1	48	82	355	2	2	1	0	0	0	0	all	7	absent	0	0
455	CB1370	daf-2	5	JU1325	Heterospecific	1	48	70	344	2	2	0	0	0	0	0	prox ut +dist ut	4	absent	0	0
21	CZ337	vab-1	7	JU1325	Heterospecific	1	40	41	393	1	3	0	0	0	0	0	prox ut +dist ut	4	absent	0	0
22	CZ337	vab-1	7	JU1325	Heterospecific	1	40	41	393	2	3	0	0	0	0	0	prox ut +dist ut	4	absent	0	0
23	CZ337	vab-1	7	JU1325	Heterospecific	1	40	41	393	2	3	0	0	0	0	0	prox ut +dist ut	4	absent	0	0
385	CZ337	vab-1	7	JU1325	Heterospecific	1	47	71	363	3	3	1	0	0	0	0	all	7	absent	0	0
388	CZ337	vab-1	7	JU1325	Heterospecific	1	47	71	363	1	1	2	0	0	0	0	all	7	absent	0	0
911	CZ337	vab-1	7	JU1325	Heterospecific	1	44	72	339	1	2	1	0	0	0	0	all	7	absent	0	0
912	CZ337	vab-1	7	JU1325	Heterospecific	1	44	72	339	2	3	1	0	0	0	0	all	7	absent	0	0
920	CZ337	vab-1	7	JU1325	Heterospecific	1	44	72	339	2	3	0	0	0	0	0	prox ut +dist ut	4	absent	0	0
251	DG1604	ceh-18;fog-2	8	JU1325	Heterospecific	1	44	68	318	0	3	0	0	0	0	0	dist ut only	2	absent	0	0
252	DG1604	ceh-18;fog-2	8	JU1325	Heterospecific	1	44	68	318	1	3	1	0	0	0	0	all	7	absent	0	0
709	DG1604	ceh-18;fog-2	8	JU1325	Heterospecific	1	47	79	348	2	2	0	0	0	0	0	prox ut +dist ut	4	absent	0	0
1013	DG1604	ceh-18;fog-2	8	JU1325	Heterospecific	1	52	75	293	2	2	0	0	0	0	0	prox ut +dist ut	4	absent	0	0
434	DG1612	vab-1;fog-2	9	JU1325	Heterospecific	1	48	68	322	2	3	1	0	0	0	0	all	7	absent	0	0
435	DG1612	vab-1;fog-2	9	JU1325	Heterospecific	1	48	68	322	3	3	1	0	0	0	0	all	7	absent	0	0
1028	DG1612	vab-1;fog-2	9	JU1325	Heterospecific	1	52	82	306	1	2	1	0	0	0	0	all	7	absent	0	0
1334	DG1612	vab-1;fog-2	9	JU1325	Heterospecific	1	50	84	414	2	2	1	0	0	0	0	all	7	absent	0	0
626	GR1034	ceh-18	10	JU1325	Heterospecific	1	48	73	461	2	3	0	0	0	0	0	prox ut +dist ut	4	absent	0	0
175	MT9940	dpl-1	11	JU1325	Heterospecific	1	37	37	373	2	3	1	0	0	0	0	all	7	absent	0	0
771	MT9940	dpl-1	11	JU1325	Heterospecific	1	46	69	371	0	2	1	0	0	0	0	dist ut +sperma	6	absent	0	0
1094	MT9940	dpl-1	11	JU1325	Heterospecific	1	49	80	383	1	2	2	0	0	0	0	all	7	absent	0	0
1095	MT9940	dpl-1	11	JU1325	Heterospecific	1	49	80	383	1	2	1	0	0	0	0	all	7	absent	0	0
1098	MT9940	dpl-1	11	JU1325	Heterospecific	1	49	80	383	2	2	0	0	0	0	0	prox ut +dist ut	4	absent	0	0
1099	MT9940	dpl-1	11	JU1325	Heterospecific	1	49	80	383	2	2	1	0	0	0	0	all	7	absent	0	0
273	MT11691	efl-1	13	JU1325	Heterospecific	1	43	68	341	2	3	1	0	0	0	0	all	7	absent	0	0
275	MT11691	efl-1	13	JU1325	Heterospecific	1	43	68	341	1	2	1	0	0	0	0	all	7	absent	0	0
817	MT11691	efl-1	13	JU1325	Heterospecific	1	43	71	430	1	1	1	0	0	0	0	all	7	absent	0	0
821	MT11691	efl-1	13	JU1325	Heterospecific	1	43	71	430	2	3	2	0	0	0	0	all	7	absent	0	0
824	MT11691	efl-1	13	JU1325	Heterospecific	1	43	71	430	1	2	1	0	0	0	0	all	7	absent	0	0
579	PS2368	itr-1(sy327)	14	JU1325	Heterospecific	1	49	70	419	1	2	0	0	0	0	0	prox ut +dist ut	4	absent	0	0
581	PS2368	itr-1(sy327)	14	JU1325	Heterospecific	1	49	70	419	1	2	0	0	0	0	0	prox ut +dist ut	4	absent	0	0
585	PS2368	itr-1(sy327)	14	JU1325	Heterospecific	1	49	70	419	2	3	1	0	0	0	0	all	7	absent	0	0
689	PS2368	itr-1(sy327)	14	JU1325	Heterospecific	1	46	78	320	1	3	1	0	0	0	0	all	7	absent	0	0
545	PS3653	ipp-5	15	JU1325	Heterospecific	1	51	68	385	1	2	1	0	0	0	0	all	7	absent	0	0
546	PS3653	ipp-5	15	JU1325	Heterospecific	1	51	68	385	1	2	1	0	0	0	0	all	7	absent	0	0
547	PS3653	ipp-5	15	JU1325	Heterospecific	1	51	68	385	2	3	1	0	0	0	0	all	7	absent	0	0
548	PS3653	ipp-5	15	JU1325	Heterospecific	1	51	68	385	0	1	0	0	0	0	0	dist ut only	2	absent	0	0
549	PS3653	ipp-5	15	JU1325	Heterospecific	1	51	68	385	1	2	1	0	0	0	0	all	7	absent	0	0
887	PS3653	ipp-5	15	JU1325	Heterospecific	1	46	72	297	2	3	2	0	0	0	0	all	7	absent	0	0
87	PS4112	plc-1	16	JU1325	Heterospecific	1	50	38	357	2	3	0	0	0	0	0	prox ut +dist ut	4	absent	0	0
88	PS4112	plc-1	16	JU1325	Heterospecific	1	50	38	357	3	3	0	0	0	0	0	prox ut +dist ut	4	absent	0	0
658	PS4112	plc-1	16	JU1325	Heterospecific	1	47	79	283	2	2	1	0	0	0	0	all	7	absent	0	0
599	PS4330	spe-41	17	JU1325	Heterospecific	1	49	71	433	1	2	0	0	0	0	0	prox ut +dist ut	4	absent	0	0
602	PS4330	spe-41	17	JU1325	Heterospecific	1	49	71	433	1	2	1	0	0	0	0	all	7	absent	0	0
604	PS4330	spe-41	17	JU1325	Heterospecific	1	49	71	433	1	2	1	0	0	0	0	all	7	absent	0	0
606	PS4330	spe-41	17	JU1325	Heterospecific	1	49	71	433	2	3	1	0	0	0	0	all	7	absent	0	0
24	RB1353	spv-1	18	JU1325	Heterospecific	1	49	40	405	2	3	0	0	0	0	0	prox ut +dist ut	4	absent	0	0
26	RB1353	spv-1	18	JU1325	Heterospecific	1	49	40	405	2	3	0	0	0	0	0	prox ut +dist ut	4	absent	0	0
27	RB1353	spv-1	18	JU1325	Heterospecific	1	49	40	405	1	3	1	0	0	0	0	all	7	absent	0	0
28	RB1353	spv-1	18	JU1325	Heterospecific	1	49	40	405	1	3	0	0	0	0	0	prox ut +dist ut	4	absent	0	0
33	RB1353	spv-1	18	JU1325	Heterospecific	1	49	40	405	2	3	1	0	0	0	0	all	7	absent	0	0
1592	RB1353	spv-1	18	JU1325	Heterospecific	1	45	75	355	2	2	1	0	0	0	0	all	7	absent	0	0
369	RB1823	gst-4	19	JU1325	Heterospecific	1	47	70	344	2	3	1	0	0	0	0	all	7	absent	0	0
373	RB1823	gst-4	19	JU1325	Heterospecific	1	47	70	344	1	2	1	0	0	0	0	all	7	absent	0	0
468	SL1138	spe-42	20	JU1325	Heterospecific	1	47	70	364	2	2	1	0	0	0	0	all	7	absent	0	0
469	SL1138	spe-42	20	JU1325	Heterospecific	1	47	70	364	1	2	0	0	0	0	0	prox ut +dist ut	4	absent	0	0
471	SL1138	spe-42	20	JU1325	Heterospecific	1	47	70	364	1	2	1	0	0	0	0	all	7	absent	0	0
472	SL1138	spe-42	20	JU1325	Heterospecific	1	47	70	364	1	2	0	0	0	0	0	prox ut +dist ut	4	absent	0	0
244	TX183	oma-1,2	21	JU1325	Heterospecific	1	45	68	302	1	3	2	0	0	0	0	all	7	absent	0	0
1114	TX183	oma-1,2	21	JU1325	Heterospecific	1	50	82	327	2	2	1	0	0	0	0	all	7	absent	0	0
1118	TX183	oma-1,2	21	JU1325	Heterospecific	1	50	82	327	1	2	1	0	0	0	0	all	7	absent	0	0
1121	TX183	oma-1,2	21	JU1325	Heterospecific	1	50	82	327	2	2	1	0	0	0	0	all	7	absent	0	0
89	JT73	itr-1(sa73)	22	JU1325	Heterospecific	1	49	39	369	0	2	0	0	0	0	0	dist ut only	2	absent	0	0
1052	JT73	itr-1(sa73)	22	JU1325	Heterospecific	1	52	80	339	1	2	2	0	0	0	0	all	7	absent	0	0
1053	JT73	itr-1(sa73)	22	JU1325	Heterospecific	1	52	80	339	2	2	2	0	0	0	0	all	7	absent	0	0
93	DH1390	rme-2	23	JU1325	Heterospecific	1	44	39	376	0	2	0	0	0	0	0	dist ut only	2	absent	0	0
94	DH1390	rme-2	23	JU1325	Heterospecific	1	44	39	376	3	3	1	0	0	0	0	all	7	absent	0	0
95	DH1390	rme-2	23	JU1325	Heterospecific	1	44	39	376	1	3	1	0	0	0	0	all	7	absent	0	0
96	DH1390	rme-2	23	JU1325	Heterospecific	1	44	39	376	2	2	0	0	0	0	0	prox ut +dist ut	4	absent	0	0
560	DH1390	rme-2	23	JU1325	Heterospecific	1	50	69	399	2	2	1	0	0	0	0	all	7	absent	0	0
563	DH1390	rme-2	23	JU1325	Heterospecific	1	50	69	399	2	2	1	0	0	0	0	all	7	absent	0	0
564	DH1390	rme-2	23	JU1325	Heterospecific	1	50	69	399	2	2	1	0	0	0	0	all	7	absent	0	0
937	DH1390	rme-2	23	JU1325	Heterospecific	1	52	70	292	2	2	1	0	0	0	0	all	7	absent	0	0
1290	BX17	fat-4	24	JU1325	Heterospecific	1	51	85	396	2	2	2	0	0	0	0	all	7	absent	0	0
1294	BX17	fat-4	24	JU1325	Heterospecific	1	51	85	396	2	3	2	0	0	0	0	all	7	absent	0	0
1299	BX17	fat-4	24	JU1325	Heterospecific	1	51	85	396	2	2	2	0	0	0	0	all	7	absent	0	0
1304	BX17	fat-4	24	JU1325	Heterospecific	1	51	85	396	3	3	1	0	0	0	0	all	7	absent	0	0
1307	BX17	fat-4	24	JU1325	Heterospecific	1	51	85	473	2	2	2	0	0	0	0	all	7	absent	0	0
1404	BX17	fat-4	24	JU1325	Heterospecific	1	61	78	316	1	2	2	0	0	0	0	all	7	absent	0	0
1406	BX17	fat-4	24	JU1325	Heterospecific	1	61	78	316	2	2	2	0	0	0	0	all	7	absent	0	0
1415	BX17	fat-4	24	JU1325	Heterospecific	1	61	78	316	2	2	2	0	0	0	0	all	7	absent	0	0
1418	BX17	fat-4	24	JU1325	Heterospecific	1	61	78	316	2	2	2	0	0	0	0	all	7	absent	0	0
1217	BX24	fat-1	25	JU1325	Heterospecific	1	55	84	298	2	2	0	0	0	0	0	prox ut +dist ut	4	absent	0	0
1218	BX24	fat-1	25	JU1325	Heterospecific	1	55	84	298	3	3	1	0	0	0	0	all	7	absent	0	0
1219	BX24	fat-1	25	JU1325	Heterospecific	1	55	84	298	2	2	2	0	0	0	0	all	7	absent	0	0
1220	BX24	fat-1	25	JU1325	Heterospecific	1	55	84	298	2	2	1	0	0	0	0	all	7	absent	0	0
1224	BX24	fat-1	25	JU1325	Heterospecific	1	55	84	298	2	3	2	0	0	0	0	all	7	absent	0	0
1526	BX24	fat-1	25	JU1325	Heterospecific	1	53	86	400	2	2	1	0	0	0	0	all	7	absent	0	0
1528	BX24	fat-1	25	JU1325	Heterospecific	1	53	86	400	1	2	2	0	0	0	0	all	7	absent	0	0
1529	BX24	fat-1	25	JU1325	Heterospecific	1	53	86	400	1	2	2	0	0	0	0	all	7	absent	0	0
1531	BX24	fat-1	25	JU1325	Heterospecific	1	53	86	400	2	2	1	0	0	0	0	all	7	absent	0	0
1532	BX24	fat-1	25	JU1325	Heterospecific	1	53	86	400	2	2	2	0	0	0	0	all	7	absent	0	0
1534	BX24	fat-1	25	JU1325	Heterospecific	1	53	86	400	2	2	2	0	0	0	0	all	7	absent	0	0
1369	BX26	fat-2	26	JU1325	Heterospecific	1	58	77	287	1	2	2	0	0	0	0	all	7	absent	0	0
1370	BX26	fat-2	26	JU1325	Heterospecific	1	58	77	287	2	2	2	0	0	0	0	all	7	absent	0	0
1372	BX26	fat-2	26	JU1325	Heterospecific	1	58	77	287	1	2	1	0	0	0	0	all	7	absent	0	0
1376	BX26	fat-2	26	JU1325	Heterospecific	1	58	77	287	1	2	2	0	0	0	0	all	7	absent	0	0
1377	BX26	fat-2	26	JU1325	Heterospecific	1	58	77	287	2	2	2	0	0	0	0	all	7	absent	0	0
1379	BX26	fat-2	26	JU1325	Heterospecific	1	58	77	287	2	2	1	0	0	0	0	all	7	absent	0	0
1382	BX26	fat-2	26	JU1325	Heterospecific	1	58	77	287	1	2	2	0	0	0	0	all	7	absent	0	0
1383	BX26	fat-2	26	JU1325	Heterospecific	1	58	77	287	2	2	2	0	0	0	0	all	7	absent	0	0
1384	BX26	fat-2	26	JU1325	Heterospecific	1	58	77	287	2	2	2	0	0	0	0	all	7	absent	0	0
1385	BX26	fat-2	26	JU1325	Heterospecific	1	58	77	287	2	2	1	0	0	0	0	all	7	absent	0	0
1558	BX26	fat-2	26	JU1325	Heterospecific	1	46	76	326	1	2	2	0	0	0	0	all	7	absent	0	0
1559	BX26	fat-2	26	JU1325	Heterospecific	1	46	76	326	1	2	1	0	0	0	0	all	7	absent	0	0
1561	BX26	fat-2	26	JU1325	Heterospecific	1	46	76	326	2	2	2	0	0	0	0	all	7	absent	0	0
1439	BX30	fat-3	27	JU1325	Heterospecific	1	55	82	359	1	2	1	0	0	0	0	all	7	absent	0	0
1440	BX30	fat-3	27	JU1325	Heterospecific	1	55	82	359	2	3	2	0	0	0	0	all	7	absent	0	0
1441	BX30	fat-3	27	JU1325	Heterospecific	1	55	82	359	2	2	1	0	0	0	0	all	7	absent	0	0
1445	BX30	fat-3	27	JU1325	Heterospecific	1	55	82	359	2	2	2	0	0	0	0	all	7	absent	0	0
1450	BX30	fat-3	27	JU1325	Heterospecific	1	55	82	359	2	2	1	0	0	0	0	all	7	absent	0	0
1452	BX30	fat-3	27	JU1325	Heterospecific	1	55	82	359	2	2	2	0	0	0	0	all	7	absent	0	0
1456	BX30	fat-3	27	JU1325	Heterospecific	1	55	82	359	2	3	2	0	0	0	0	all	7	absent	0	0
1458	BX30	fat-3	27	JU1325	Heterospecific	1	55	82	359	2	2	2	0	0	0	0	all	7	absent	0	0
1462	BX30	fat-3	27	JU1325	Heterospecific	1	55	82	359	1	2	1	0	0	0	0	all	7	absent	0	0
1463	BX30	fat-3	27	JU1325	Heterospecific	1	55	82	359	2	2	0	0	0	0	0	prox ut +dist ut	4	absent	0	0
1464	BX30	fat-3	27	JU1325	Heterospecific	1	55	82	359	1	2	2	0	0	0	0	all	7	absent	0	0
1465	BX30	fat-3	27	JU1325	Heterospecific	1	55	82	359	2	2	0	0	0	0	0	prox ut +dist ut	4	absent	0	0
1467	BX30	fat-3	27	JU1325	Heterospecific	1	55	82	359	2	2	1	0	0	0	0	all	7	absent	0	0
1468	BX30	fat-3	27	JU1325	Heterospecific	1	55	82	359	2	2	1	0	0	0	0	all	7	absent	0	0
1470	BX30	fat-3	27	JU1325	Heterospecific	1	55	82	359	2	2	0	0	0	0	0	prox ut +dist ut	4	absent	0	0
1472	BX30	fat-3	27	JU1325	Heterospecific	1	55	82	359	2	2	1	0	0	0	0	all	7	absent	0	0
1473	BX30	fat-3	27	JU1325	Heterospecific	1	55	82	359	1	2	1	0	0	0	0	all	7	absent	0	0
1249	BX52	fat-1,4	28	JU1325	Heterospecific	1	54	84	363	1	2	2	0	0	0	0	all	7	absent	0	0
1250	BX52	fat-1,4	28	JU1325	Heterospecific	1	54	84	363	1	2	2	0	0	0	0	all	7	absent	0	0
1252	BX52	fat-1,4	28	JU1325	Heterospecific	1	54	84	363	3	3	2	0	0	0	0	all	7	absent	0	0
1254	BX52	fat-1,4	28	JU1325	Heterospecific	1	54	84	363	2	2	1	0	0	0	0	all	7	absent	0	0
1256	BX52	fat-1,4	28	JU1325	Heterospecific	1	54	84	363	3	3	1	0	0	0	0	all	7	absent	0	0
1261	BX52	fat-1,4	28	JU1325	Heterospecific	1	54	84	363	2	2	2	0	0	0	0	all	7	absent	0	0
1262	BX52	fat-1,4	28	JU1325	Heterospecific	1	54	84	363	3	3	2	0	0	0	0	all	7	absent	0	0
1504	BX52	fat-1,4	28	JU1325	Heterospecific	1	55	86	385	1	2	1	0	0	0	0	all	7	absent	0	0
1509	BX52	fat-1,4	28	JU1325	Heterospecific	1	55	86	385	2	2	0	0	0	0	0	prox ut +dist ut	4	absent	0	0
1512	BX52	fat-1,4	28	JU1325	Heterospecific	1	55	86	385	2	2	2	0	0	0	0	all	7	absent	0	0
1513	BX52	fat-1,4	28	JU1325	Heterospecific	1	55	86	385	1	2	0	0	0	0	0	prox ut +dist ut	4	absent	0	0
44	N2	wildtype	1	JK574	Conspecific	0	48	40	420	1	3	2	1	0	0	1	all	7	prox gonad only	1	0
1208	N2	wildtype	1	JK574	Conspecific	0	42	81	427	2	2	1	1	0	0	1	all	7	prox gonad only	1	0
1362	N2	wildtype	1	JK574	Conspecific	0	47	86	446	2	3	2	1	0	0	1	all	7	prox gonad only	1	0
1665	N2	wildtype	1	JK574	Conspecific	0	43	71	422	2	2	2	1	0	0	1	all	7	prox gonad only	1	0
297	AD186	egg-1	2	JK574	Conspecific	0	41	68	370	2	2	1	1	0	0	1	all	7	prox gonad only	1	0
298	AD186	egg-1	2	JK574	Conspecific	0	41	68	370	2	3	1	2	0	0	1	all	7	prox gonad only	1	0
364	AU98	inx-14	3	JK574	Conspecific	0	48	70	331	1	3	2	1	0	0	1	all	7	prox gonad only	1	0
416	BA671	spe-9	4	JK574	Conspecific	0	45	72	392	1	3	2	1	0	0	1	all	7	prox gonad only	1	0
747	BA671	spe-9	4	JK574	Conspecific	0	47	69	338	2	3	2	1	0	0	1	all	7	prox gonad only	1	0
158	CB1370	daf-2	5	JK574	Conspecific	0	39	37	337	3	3	3	1	0	0	1	all	7	prox gonad only	1	0
162	CB1370	daf-2	5	JK574	Conspecific	0	39	37	337	3	3	3	1	0	0	1	all	7	prox gonad only	1	0
424	CB1370	daf-2	5	JK574	Conspecific	0	42	71	414	3	3	0	1	0	0	1	prox ut +dist ut	4	prox gonad only	1	0
458	CB1370	daf-2	5	JK574	Conspecific	0	48	70	353	2	3	1	1	0	0	1	all	7	prox gonad only	1	0
461	CB1370	daf-2	5	JK574	Conspecific	0	48	70	353	2	3	2	1	0	0	1	all	7	prox gonad only	1	0
954	DG1604	ceh-18;fog-2	8	JK574	Conspecific	0	50	72	317	2	3	2	1	0	0	1	all	7	prox gonad only	1	0
1021	DG1604	ceh-18;fog-2	8	JK574	Conspecific	0	52	76	300	3	3	1	1	0	0	1	all	7	prox gonad only	1	0
230	DG1612	vab-1;fog-2	9	JK574	Conspecific	0	46	69	290	3	3	1	1	0	0	1	all	7	prox gonad only	1	0
232	DG1612	vab-1;fog-2	9	JK574	Conspecific	0	46	69	290	2	3	1	1	0	0	1	all	7	prox gonad only	1	0
233	DG1612	vab-1;fog-2	9	JK574	Conspecific	0	46	69	290	3	3	1	1	0	0	1	all	7	prox gonad only	1	0
235	DG1612	vab-1;fog-2	9	JK574	Conspecific	0	46	69	290	2	3	1	1	0	0	1	all	7	prox gonad only	1	0
236	DG1612	vab-1;fog-2	9	JK574	Conspecific	0	46	69	290	2	3	2	1	0	0	1	all	7	prox gonad only	1	0
237	DG1612	vab-1;fog-2	9	JK574	Conspecific	0	46	69	290	2	3	2	1	0	0	1	all	7	prox gonad only	1	0
1037	DG1612	vab-1;fog-2	9	JK574	Conspecific	0	52	83	316	3	3	1	1	0	0	1	all	7	prox gonad only	1	0
1335	DG1612	vab-1;fog-2	9	JK574	Conspecific	0	50	86	418	3	3	2	1	0	0	1	all	7	prox gonad only	1	0
1338	DG1612	vab-1;fog-2	9	JK574	Conspecific	0	50	86	418	2	3	2	1	0	0	1	all	7	prox gonad only	1	0
218	GR1034	ceh-18	10	JK574	Conspecific	0	42	37	388	2	3	3	1	0	0	1	all	7	prox gonad only	1	0
219	GR1034	ceh-18	10	JK574	Conspecific	0	42	37	388	2	3	1	1	0	0	1	all	7	prox gonad only	1	0
633	GR1034	ceh-18	10	JK574	Conspecific	0	48	73	468	2	3	1	1	0	0	1	all	7	prox gonad only	1	0
635	GR1034	ceh-18	10	JK574	Conspecific	0	48	73	468	1	3	2	1	0	0	1	all	7	prox gonad only	1	0
1622	GR1034	ceh-18	10	JK574	Conspecific	0	43	75	387	2	2	2	1	0	0	1	all	7	prox gonad only	1	0
1629	GR1034	ceh-18	10	JK574	Conspecific	0	43	75	387	2	2	2	2	0	0	1	all	7	prox gonad only	1	0
660	PS4112	plc-1	16	JK574	Conspecific	0	47	79	292	2	3	2	1	0	0	1	all	7	prox gonad only	1	0
812	RB1353	spv-1	18	JK574	Conspecific	0	44	72	417	2	3	1	1	0	0	1	all	7	prox gonad only	1	0
813	RB1353	spv-1	18	JK574	Conspecific	0	44	72	417	2	2	1	1	0	0	1	all	7	prox gonad only	1	0
1597	RB1353	spv-1	18	JK574	Conspecific	0	45	76	370	2	2	2	1	0	0	1	all	7	prox gonad only	1	0
1601	RB1353	spv-1	18	JK574	Conspecific	0	45	76	370	2	2	2	1	0	0	1	all	7	prox gonad only	1	0
1604	RB1353	spv-1	18	JK574	Conspecific	0	45	76	370	2	3	2	1	0	0	1	all	7	prox gonad only	1	0
1605	RB1353	spv-1	18	JK574	Conspecific	0	45	76	370	2	2	2	1	0	0	1	all	7	prox gonad only	1	0
247	TX183	oma-1,2	21	JK574	Conspecific	0	45	68	308	2	3	2	1	0	0	1	all	7	prox gonad only	1	0
250	TX183	oma-1,2	21	JK574	Conspecific	0	45	68	308	2	3	2	1	0	0	1	all	7	prox gonad only	1	0
514	TX183	oma-1,2	21	JK574	Conspecific	0	44	71	419	2	3	2	2	0	0	1	all	7	prox gonad only	1	0
516	TX183	oma-1,2	21	JK574	Conspecific	0	44	71	419	1	3	1	1	0	0	1	all	7	prox gonad only	1	0
517	TX183	oma-1,2	21	JK574	Conspecific	0	44	71	419	1	2	1	1	0	0	1	all	7	prox gonad only	1	0
518	TX183	oma-1,2	21	JK574	Conspecific	0	44	71	419	1	3	2	2	0	0	1	all	7	prox gonad only	1	0
519	TX183	oma-1,2	21	JK574	Conspecific	0	44	71	419	2	3	2	2	0	0	1	all	7	prox gonad only	1	0
1125	TX183	oma-1,2	21	JK574	Conspecific	0	50	82	336	2	2	1	1	0	0	1	all	7	prox gonad only	1	0
127	JT73	itr-1(sa73)	22	JK574	Conspecific	0	49	42	408	3	3	1	1	0	0	1	all	7	prox gonad only	1	0
617	JT73	itr-1(sa73)	22	JK574	Conspecific	0	49	72	452	2	2	1	1	0	0	1	all	7	prox gonad only	1	0
874	JT73	itr-1(sa73)	22	JK574	Conspecific	0	46	72	287	2	3	2	1	0	0	1	all	7	prox gonad only	1	0
876	JT73	itr-1(sa73)	22	JK574	Conspecific	0	46	72	287	2	2	1	1	0	0	1	all	7	prox gonad only	1	0
877	JT73	itr-1(sa73)	22	JK574	Conspecific	0	46	72	287	3	3	2	1	0	0	1	all	7	prox gonad only	1	0
879	JT73	itr-1(sa73)	22	JK574	Conspecific	0	46	72	287	2	3	2	1	0	0	1	all	7	prox gonad only	1	0
1066	JT73	itr-1(sa73)	22	JK574	Conspecific	0	52	81	348	2	2	1	1	0	0	1	all	7	prox gonad only	1	0
1067	JT73	itr-1(sa73)	22	JK574	Conspecific	0	52	81	348	2	3	2	1	0	0	1	all	7	prox gonad only	1	0
1330	BX17	fat-4	24	JK574	Conspecific	0	51	85	410	2	3	2	1	0	0	1	all	7	prox gonad only	1	0
1241	BX24	fat-1	25	JK574	Conspecific	0	55	84	347	1	2	2	2	0	0	1	all	7	prox gonad only	1	0
1248	BX24	fat-1	25	JK574	Conspecific	0	55	84	347	2	2	2	1	0	0	1	all	7	prox gonad only	1	0
1573	BX26	fat-2	26	JK574	Conspecific	0	46	76	337	2	2	2	1	0	0	1	all	7	prox gonad only	1	0
1582	BX26	fat-2	26	JK574	Conspecific	0	46	76	337	2	3	2	1	0	0	1	all	7	prox gonad only	1	0
1490	BX30	fat-3	27	JK574	Conspecific	0	55	86	368	2	3	2	1	0	0	1	all	7	prox gonad only	1	0
1271	BX52	fat-1,4	28	JK574	Conspecific	0	54	84	376	2	3	1	1	0	0	1	all	7	prox gonad only	1	0
1282	BX52	fat-1,4	28	JK574	Conspecific	0	54	84	376	2	2	2	1	0	0	1	all	7	prox gonad only	1	0
1524	BX52	fat-1,4	28	JK574	Conspecific	0	55	87	389	2	3	2	1	0	0	1	all	7	prox gonad only	1	0
7	N2	wildtype	1	JU1325	Heterospecific	1	48	40	364	1	3	1	1	0	0	1	all	7	prox gonad only	1	0
166	N2	wildtype	1	JU1325	Heterospecific	1	38	37	354	1	3	1	1	0	0	1	all	7	prox gonad only	1	0
309	N2	wildtype	1	JU1325	Heterospecific	1	41	68	381	2	3	1	1	0	0	1	all	7	prox gonad only	1	0
496	N2	wildtype	1	JU1325	Heterospecific	1	44	71	396	1	2	1	1	0	0	1	all	7	prox gonad only	1	0
500	N2	wildtype	1	JU1325	Heterospecific	1	44	71	396	1	3	1	1	0	0	1	all	7	prox gonad only	1	0
722	N2	wildtype	1	JU1325	Heterospecific	1	45	79	369	1	1	1	1	0	0	1	all	7	prox gonad only	1	0
727	N2	wildtype	1	JU1325	Heterospecific	1	45	79	369	1	3	1	1	0	0	1	all	7	prox gonad only	1	0
997	N2	wildtype	1	JU1325	Heterospecific	1	48	81	373	1	3	2	1	0	0	1	all	7	prox gonad only	1	0
1005	N2	wildtype	1	JU1325	Heterospecific	1	48	81	373	2	3	2	1	0	0	1	all	7	prox gonad only	1	0
1354	N2	wildtype	1	JU1325	Heterospecific	1	47	86	437	2	2	1	1	0	0	1	all	7	prox gonad only	1	0
198	AD186	egg-1	2	JU1325	Heterospecific	1	43	29	370	3	3	2	1	0	0	1	all	7	prox gonad only	1	0
290	AD186	egg-1	2	JU1325	Heterospecific	1	41	68	359	2	3	1	1	0	0	1	all	7	prox gonad only	1	0
671	AU98	inx-14	3	JU1325	Heterospecific	1	47	80	300	2	3	1	1	0	0	1	all	7	prox gonad only	1	0
1133	BA671	spe-9	4	JU1325	Heterospecific	1	48	82	355	2	2	2	1	0	0	1	all	7	prox gonad only	1	0
1138	BA671	spe-9	4	JU1325	Heterospecific	1	48	82	355	2	2	1	1	0	0	1	all	7	prox gonad only	1	0
1148	BA671	spe-9	4	JU1325	Heterospecific	1	48	82	355	1	2	1	1	0	0	1	all	7	prox gonad only	1	0
450	CB1370	daf-2	5	JU1325	Heterospecific	1	48	70	344	1	2	1	1	0	0	1	all	7	prox gonad only	1	0
453	CB1370	daf-2	5	JU1325	Heterospecific	1	48	70	344	1	2	1	1	0	0	1	all	7	prox gonad only	1	0
20	CZ337	vab-1	7	JU1325	Heterospecific	1	40	41	393	2	3	1	1	0	0	1	all	7	prox gonad only	1	0
916	CZ337	vab-1	7	JU1325	Heterospecific	1	44	72	339	2	3	2	1	0	0	1	all	7	prox gonad only	1	0
253	DG1604	ceh-18;fog-2	8	JU1325	Heterospecific	1	44	68	318	3	3	1	1	0	0	1	all	7	prox gonad only	1	0
259	DG1604	ceh-18;fog-2	8	JU1325	Heterospecific	1	44	68	318	2	3	1	1	0	0	1	all	7	prox gonad only	1	0
229	DG1612	vab-1;fog-2	9	JU1325	Heterospecific	1	46	68	280	3	3	2	1	0	0	1	all	7	prox gonad only	1	0
432	DG1612	vab-1;fog-2	9	JU1325	Heterospecific	1	48	68	322	2	3	1	1	0	0	1	all	7	prox gonad only	1	0
436	DG1612	vab-1;fog-2	9	JU1325	Heterospecific	1	48	68	322	1	3	1	1	0	0	1	all	7	prox gonad only	1	0
1434	DG1612	vab-1;fog-2	9	JU1325	Heterospecific	1	58	77	333	2	2	2	1	0	0	1	all	7	prox gonad only	1	0
3	GR1034	ceh-18	10	JU1325	Heterospecific	1	49	39	348	2	3	0	1	0	0	1	prox ut +dist ut	4	prox gonad only	1	0
6	GR1034	ceh-18	10	JU1325	Heterospecific	1	49	39	348	3	3	1	1	0	0	1	all	7	prox gonad only	1	0
210	GR1034	ceh-18	10	JU1325	Heterospecific	1	42	37	380	2	3	1	1	0	0	1	all	7	prox gonad only	1	0
211	GR1034	ceh-18	10	JU1325	Heterospecific	1	42	37	380	2	3	1	1	0	0	1	all	7	prox gonad only	1	0
212	GR1034	ceh-18	10	JU1325	Heterospecific	1	42	37	380	2	3	1	1	0	0	1	all	7	prox gonad only	1	0
213	GR1034	ceh-18	10	JU1325	Heterospecific	1	42	37	380	2	3	2	1	0	0	1	all	7	prox gonad only	1	0
624	GR1034	ceh-18	10	JU1325	Heterospecific	1	48	73	461	0	2	1	1	0	0	1	dist ut +sperma	6	prox gonad only	1	0
625	GR1034	ceh-18	10	JU1325	Heterospecific	1	48	73	461	1	3	1	1	0	0	1	all	7	prox gonad only	1	0
629	GR1034	ceh-18	10	JU1325	Heterospecific	1	48	73	461	1	3	1	1	0	0	1	all	7	prox gonad only	1	0
532	MT9940	dpl-1	11	JU1325	Heterospecific	1	52	66	375	3	3	1	1	0	0	1	all	7	prox gonad only	1	0
533	MT9940	dpl-1	11	JU1325	Heterospecific	1	52	66	375	2	2	1	1	0	0	1	all	7	prox gonad only	1	0
535	MT9940	dpl-1	11	JU1325	Heterospecific	1	52	66	375	1	2	1	1	0	0	1	all	7	prox gonad only	1	0
536	MT9940	dpl-1	11	JU1325	Heterospecific	1	52	66	375	2	3	1	1	0	0	1	all	7	prox gonad only	1	0
1104	MT9940	dpl-1	11	JU1325	Heterospecific	1	49	80	383	2	2	2	1	0	0	1	all	7	prox gonad only	1	0
222	PS2368	itr-1(sy327)	14	JU1325	Heterospecific	1	41	37	394	2	3	1	1	0	0	1	all	7	prox gonad only	1	0
580	PS2368	itr-1(sy327)	14	JU1325	Heterospecific	1	49	70	419	2	3	1	1	0	0	1	all	7	prox gonad only	1	0
582	PS2368	itr-1(sy327)	14	JU1325	Heterospecific	1	49	70	419	3	3	1	1	0	0	1	all	7	prox gonad only	1	0
583	PS2368	itr-1(sy327)	14	JU1325	Heterospecific	1	49	70	419	1	2	2	1	0	0	1	all	7	prox gonad only	1	0
586	PS2368	itr-1(sy327)	14	JU1325	Heterospecific	1	49	70	419	2	3	2	1	0	0	1	all	7	prox gonad only	1	0
587	PS2368	itr-1(sy327)	14	JU1325	Heterospecific	1	49	70	419	2	3	2	1	0	0	1	all	7	prox gonad only	1	0
690	PS2368	itr-1(sy327)	14	JU1325	Heterospecific	1	46	78	320	2	2	1	1	0	0	1	all	7	prox gonad only	1	0
133	PS3653	ipp-5	15	JU1325	Heterospecific	1	41	34	300	3	3	1	1	0	0	1	all	7	prox gonad only	1	0
135	PS3653	ipp-5	15	JU1325	Heterospecific	1	41	34	300	3	3	0	1	0	0	1	prox ut +dist ut	4	prox gonad only	1	0
137	PS3653	ipp-5	15	JU1325	Heterospecific	1	41	34	300	2	3	1	1	0	0	1	all	7	prox gonad only	1	0
86	PS4112	plc-1	16	JU1325	Heterospecific	1	50	38	357	2	3	1	1	0	0	1	all	7	prox gonad only	1	0
854	PS4112	plc-1	16	JU1325	Heterospecific	1	47	74	257	1	3	1	1	0	0	1	all	7	prox gonad only	1	0
856	PS4112	plc-1	16	JU1325	Heterospecific	1	47	74	257	1	3	2	1	0	0	1	all	7	prox gonad only	1	0
859	PS4112	plc-1	16	JU1325	Heterospecific	1	47	74	257	1	2	2	2	0	0	1	all	7	prox gonad only	1	0
862	PS4112	plc-1	16	JU1325	Heterospecific	1	47	74	257	2	2	1	1	0	0	1	all	7	prox gonad only	1	0
13	PS4330	spe-41	17	JU1325	Heterospecific	1	46	41	376	2	2	1	1	0	0	1	all	7	prox gonad only	1	0
603	PS4330	spe-41	17	JU1325	Heterospecific	1	49	71	433	2	2	1	1	0	0	1	all	7	prox gonad only	1	0
1182	PS4330	spe-41	17	JU1325	Heterospecific	1	43	82	403	2	2	1	1	0	0	1	all	7	prox gonad only	1	0
1183	PS4330	spe-41	17	JU1325	Heterospecific	1	43	82	403	2	2	1	1	0	0	1	all	7	prox gonad only	1	0
1186	PS4330	spe-41	17	JU1325	Heterospecific	1	43	82	403	1	2	1	1	0	0	1	all	7	prox gonad only	1	0
1188	PS4330	spe-41	17	JU1325	Heterospecific	1	43	82	403	2	2	1	1	0	0	1	all	7	prox gonad only	1	0
25	RB1353	spv-1	18	JU1325	Heterospecific	1	49	40	405	3	2	0	1	0	0	1	prox ut +dist ut	4	prox gonad only	1	0
29	RB1353	spv-1	18	JU1325	Heterospecific	1	49	40	405	3	3	0	1	0	0	1	prox ut +dist ut	4	prox gonad only	1	0
31	RB1353	spv-1	18	JU1325	Heterospecific	1	49	40	405	2	3	1	1	0	0	1	all	7	prox gonad only	1	0
801	RB1353	spv-1	18	JU1325	Heterospecific	1	44	72	408	1	2	1	1	0	0	1	all	7	prox gonad only	1	0
1587	RB1353	spv-1	18	JU1325	Heterospecific	1	45	75	355	2	2	2	2	0	0	1	all	7	prox gonad only	1	0
1594	RB1353	spv-1	18	JU1325	Heterospecific	1	45	75	355	2	2	2	1	0	0	1	all	7	prox gonad only	1	0
187	RB1823	gst-4	19	JU1325	Heterospecific	1	43	35	351	3	3	2	1	0	0	1	all	7	prox gonad only	1	0
188	RB1823	gst-4	19	JU1325	Heterospecific	1	43	35	351	2	3	2	1	0	0	1	all	7	prox gonad only	1	0
374	RB1823	gst-4	19	JU1325	Heterospecific	1	47	70	344	3	3	2	1	0	0	1	all	7	prox gonad only	1	0
752	RB1823	gst-4	19	JU1325	Heterospecific	1	46	70	354	2	2	1	1	0	0	1	all	7	prox gonad only	1	0
756	RB1823	gst-4	19	JU1325	Heterospecific	1	46	70	354	3	3	1	1	0	0	1	all	7	prox gonad only	1	0
757	RB1823	gst-4	19	JU1325	Heterospecific	1	46	70	354	2	3	2	1	0	0	1	all	7	prox gonad only	1	0
470	SL1138	spe-42	20	JU1325	Heterospecific	1	47	70	364	2	2	1	1	0	0	1	all	7	prox gonad only	1	0
1070	SL1138	spe-42	20	JU1325	Heterospecific	1	50	81	360	2	2	1	1	0	0	1	all	7	prox gonad only	1	0
1071	SL1138	spe-42	20	JU1325	Heterospecific	1	50	81	360	2	2	1	1	0	0	1	all	7	prox gonad only	1	0
1072	SL1138	spe-42	20	JU1325	Heterospecific	1	50	81	360	2	2	1	1	0	0	1	all	7	prox gonad only	1	0
1078	SL1138	spe-42	20	JU1325	Heterospecific	1	50	81	360	2	2	1	1	0	0	1	all	7	prox gonad only	1	0
238	TX183	oma-1,2	21	JU1325	Heterospecific	1	45	68	302	3	3	3	1	0	0	1	all	7	prox gonad only	1	0
241	TX183	oma-1,2	21	JU1325	Heterospecific	1	45	68	302	2	3	2	1	0	0	1	all	7	prox gonad only	1	0
243	TX183	oma-1,2	21	JU1325	Heterospecific	1	45	68	302	3	3	1	1	0	0	1	all	7	prox gonad only	1	0
245	TX183	oma-1,2	21	JU1325	Heterospecific	1	45	68	302	2	2	2	1	0	0	1	all	7	prox gonad only	1	0
512	TX183	oma-1,2	21	JU1325	Heterospecific	1	44	71	409	2	3	2	2	0	0	1	all	7	prox gonad only	1	0
90	JT73	itr-1(sa73)	22	JU1325	Heterospecific	1	49	39	369	2	3	0	1	0	0	1	prox ut +dist ut	4	prox gonad only	1	0
1048	JT73	itr-1(sa73)	22	JU1325	Heterospecific	1	52	80	339	1	2	2	1	0	0	1	all	7	prox gonad only	1	0
1057	JT73	itr-1(sa73)	22	JU1325	Heterospecific	1	52	80	339	2	2	1	1	0	0	1	all	7	prox gonad only	1	0
92	DH1390	rme-2	23	JU1325	Heterospecific	1	44	39	376	1	2	0	1	0	0	1	prox ut +dist ut	4	prox gonad only	1	0
1298	BX17	fat-4	24	JU1325	Heterospecific	1	51	85	396	2	3	1	1	0	0	1	all	7	prox gonad only	1	0
1300	BX17	fat-4	24	JU1325	Heterospecific	1	51	85	396	3	3	2	1	0	0	1	all	7	prox gonad only	1	0
1305	BX17	fat-4	24	JU1325	Heterospecific	1	51	85	396	2	2	2	1	0	0	1	all	7	prox gonad only	1	0
1308	BX17	fat-4	24	JU1325	Heterospecific	1	51	85	473	2	2	2	1	0	0	1	all	7	prox gonad only	1	0
1409	BX17	fat-4	24	JU1325	Heterospecific	1	61	78	316	2	3	2	1	0	0	1	all	7	prox gonad only	1	0
1411	BX17	fat-4	24	JU1325	Heterospecific	1	61	78	316	3	3	2	1	0	0	1	all	7	prox gonad only	1	0
1413	BX17	fat-4	24	JU1325	Heterospecific	1	61	78	316	2	2	2	1	0	0	1	all	7	prox gonad only	1	0
1222	BX24	fat-1	25	JU1325	Heterospecific	1	55	84	298	2	2	2	1	0	0	1	all	7	prox gonad only	1	0
1225	BX24	fat-1	25	JU1325	Heterospecific	1	55	84	298	3	3	2	1	0	0	1	all	7	prox gonad only	1	0
1535	BX24	fat-1	25	JU1325	Heterospecific	1	53	86	400	1	2	2	1	0	0	1	all	7	prox gonad only	1	0
1536	BX24	fat-1	25	JU1325	Heterospecific	1	53	86	400	2	2	1	1	0	0	1	all	7	prox gonad only	1	0
1373	BX26	fat-2	26	JU1325	Heterospecific	1	58	77	287	1	2	1	1	0	0	1	all	7	prox gonad only	1	0
1375	BX26	fat-2	26	JU1325	Heterospecific	1	58	77	287	2	3	2	1	0	0	1	all	7	prox gonad only	1	0
1378	BX26	fat-2	26	JU1325	Heterospecific	1	58	77	287	1	2	2	1	0	0	1	all	7	prox gonad only	1	0
1381	BX26	fat-2	26	JU1325	Heterospecific	1	58	77	287	1	2	2	1	0	0	1	all	7	prox gonad only	1	0
1555	BX26	fat-2	26	JU1325	Heterospecific	1	46	76	326	1	2	2	1	0	0	1	all	7	prox gonad only	1	0
1564	BX26	fat-2	26	JU1325	Heterospecific	1	46	76	326	2	2	2	1	0	0	1	all	7	prox gonad only	1	0
1566	BX26	fat-2	26	JU1325	Heterospecific	1	46	76	326	1	2	1	1	0	0	1	all	7	prox gonad only	1	0
1446	BX30	fat-3	27	JU1325	Heterospecific	1	55	82	359	2	3	2	1	0	0	1	all	7	prox gonad only	1	0
1448	BX30	fat-3	27	JU1325	Heterospecific	1	55	82	359	2	2	2	1	0	0	1	all	7	prox gonad only	1	0
1449	BX30	fat-3	27	JU1325	Heterospecific	1	55	82	359	2	2	1	1	0	0	1	all	7	prox gonad only	1	0
1451	BX30	fat-3	27	JU1325	Heterospecific	1	55	82	359	2	3	2	1	0	0	1	all	7	prox gonad only	1	0
1457	BX30	fat-3	27	JU1325	Heterospecific	1	55	82	359	2	2	1	1	0	0	1	all	7	prox gonad only	1	0
1459	BX30	fat-3	27	JU1325	Heterospecific	1	55	82	359	2	2	2	1	0	0	1	all	7	prox gonad only	1	0
1471	BX30	fat-3	27	JU1325	Heterospecific	1	55	82	359	2	3	2	1	0	0	1	all	7	prox gonad only	1	0
1251	BX52	fat-1,4	28	JU1325	Heterospecific	1	54	84	363	2	2	2	1	0	0	1	all	7	prox gonad only	1	0
1260	BX52	fat-1,4	28	JU1325	Heterospecific	1	54	84	363	2	2	2	1	0	0	1	all	7	prox gonad only	1	0
1502	BX52	fat-1,4	28	JU1325	Heterospecific	1	55	86	385	2	3	1	1	0	0	1	all	7	prox gonad only	1	0
1511	BX52	fat-1,4	28	JU1325	Heterospecific	1	55	86	385	2	2	2	1	0	0	1	all	7	prox gonad only	1	0
1060	JT73	itr-1(sa73)	22	JK574	Conspecific	0	52	81	348	2	3	2	0	1	0	1	all	7	dist gonad only	2	0
352	AU98	inx-14	3	JU1325	Heterospecific	1	48	70	324	2	3	1	0	1	0	1	all	7	dist gonad only	2	0
1140	BA671	spe-9	4	JU1325	Heterospecific	1	48	82	355	2	2	1	0	1	0	1	all	7	dist gonad only	2	0
601	PS4330	spe-41	17	JU1325	Heterospecific	1	49	71	433	2	2	0	0	1	0	1	prox ut +dist ut	4	dist gonad only	2	0
1077	SL1138	spe-42	20	JU1325	Heterospecific	1	50	81	360	2	2	2	0	2	0	1	all	7	dist gonad only	2	0
1416	BX17	fat-4	24	JU1325	Heterospecific	1	61	78	316	2	2	1	0	1	0	1	all	7	dist gonad only	2	0
167	N2	wildtype	1	JK574	Conspecific	0	38	38	362	3	3	2	1	1	0	1	all	7	prox gonad + dist gonad	3	0
170	N2	wildtype	1	JK574	Conspecific	0	38	38	362	3	3	2	1	1	0	1	all	7	prox gonad + dist gonad	3	0
412	BA671	spe-9	4	JK574	Conspecific	0	45	72	392	2	3	2	1	1	0	1	all	7	prox gonad + dist gonad	3	0
415	BA671	spe-9	4	JK574	Conspecific	0	45	72	392	3	3	3	2	1	0	1	all	7	prox gonad + dist gonad	3	0
394	CZ337	vab-1	7	JK574	Conspecific	0	47	71	373	3	3	2	1	1	0	1	all	7	prox gonad + dist gonad	3	0
1621	GR1034	ceh-18	10	JK574	Conspecific	0	43	75	387	2	2	2	2	1	0	1	all	7	prox gonad + dist gonad	3	0
591	PS2368	itr-1(sy327)	14	JK574	Conspecific	0	49	71	425	2	3	2	2	2	0	1	all	7	prox gonad + dist gonad	3	0
515	TX183	oma-1,2	21	JK574	Conspecific	0	44	71	419	2	2	1	1	1	0	1	all	7	prox gonad + dist gonad	3	0
520	TX183	oma-1,2	21	JK574	Conspecific	0	44	71	419	2	3	1	1	1	0	1	all	7	prox gonad + dist gonad	3	0
522	TX183	oma-1,2	21	JK574	Conspecific	0	44	71	419	2	3	2	2	1	0	1	all	7	prox gonad + dist gonad	3	0
1128	TX183	oma-1,2	21	JK574	Conspecific	0	50	82	336	2	2	2	2	1	0	1	all	7	prox gonad + dist gonad	3	0
616	JT73	itr-1(sa73)	22	JK574	Conspecific	0	49	72	452	2	3	1	1	1	0	1	all	7	prox gonad + dist gonad	3	0
1312	BX17	fat-4	24	JK574	Conspecific	0	51	85	410	2	2	1	1	1	0	1	all	7	prox gonad + dist gonad	3	0
1392	BX26	fat-2	26	JK574	Conspecific	0	58	78	301	1	3	1	1	1	0	1	all	7	prox gonad + dist gonad	3	0
1395	BX26	fat-2	26	JK574	Conspecific	0	58	78	301	3	3	2	2	1	0	1	all	7	prox gonad + dist gonad	3	0
1399	BX26	fat-2	26	JK574	Conspecific	0	58	78	301	2	3	2	1	1	0	1	all	7	prox gonad + dist gonad	3	0
1570	BX26	fat-2	26	JK574	Conspecific	0	46	76	337	2	2	2	2	1	0	1	all	7	prox gonad + dist gonad	3	0
1578	BX26	fat-2	26	JK574	Conspecific	0	46	76	337	2	2	2	2	1	0	1	all	7	prox gonad + dist gonad	3	0
1581	BX26	fat-2	26	JK574	Conspecific	0	46	76	337	2	3	2	2	2	0	1	all	7	prox gonad + dist gonad	3	0
1586	BX26	fat-2	26	JK574	Conspecific	0	46	76	337	1	2	2	2	2	0	1	all	7	prox gonad + dist gonad	3	0
497	N2	wildtype	1	JU1325	Heterospecific	1	44	71	396	3	3	2	1	1	0	1	all	7	prox gonad + dist gonad	3	0
498	N2	wildtype	1	JU1325	Heterospecific	1	44	71	396	2	3	2	1	1	0	1	all	7	prox gonad + dist gonad	3	0
716	N2	wildtype	1	JU1325	Heterospecific	1	45	79	369	3	3	1	1	1	0	1	all	7	prox gonad + dist gonad	3	0
718	N2	wildtype	1	JU1325	Heterospecific	1	45	79	369	2	2	1	1	1	0	1	all	7	prox gonad + dist gonad	3	0
720	N2	wildtype	1	JU1325	Heterospecific	1	45	79	369	2	3	2	2	1	0	1	all	7	prox gonad + dist gonad	3	0
723	N2	wildtype	1	JU1325	Heterospecific	1	45	79	369	3	3	2	1	1	0	1	all	7	prox gonad + dist gonad	3	0
1000	N2	wildtype	1	JU1325	Heterospecific	1	48	81	373	2	2	1	1	1	0	1	all	7	prox gonad + dist gonad	3	0
1003	N2	wildtype	1	JU1325	Heterospecific	1	48	81	373	3	3	2	2	2	0	1	all	7	prox gonad + dist gonad	3	0
1201	N2	wildtype	1	JU1325	Heterospecific	1	42	82	419	2	2	1	1	1	0	1	all	7	prox gonad + dist gonad	3	0
1203	N2	wildtype	1	JU1325	Heterospecific	1	42	82	419	2	2	1	1	1	0	1	all	7	prox gonad + dist gonad	3	0
1543	N2	wildtype	1	JU1325	Heterospecific	1	52	84	409	2	3	2	1	1	0	1	all	7	prox gonad + dist gonad	3	0
1544	N2	wildtype	1	JU1325	Heterospecific	1	52	84	409	2	2	1	1	1	0	1	all	7	prox gonad + dist gonad	3	0
1548	N2	wildtype	1	JU1325	Heterospecific	1	52	84	409	2	2	1	1	1	0	1	all	7	prox gonad + dist gonad	3	0
1654	N2	wildtype	1	JU1325	Heterospecific	1	43	71	413	2	3	2	1	2	0	1	all	7	prox gonad + dist gonad	3	0
1656	N2	wildtype	1	JU1325	Heterospecific	1	43	71	413	2	2	1	1	1	0	1	all	7	prox gonad + dist gonad	3	0
1657	N2	wildtype	1	JU1325	Heterospecific	1	43	71	413	2	2	2	2	2	0	1	all	7	prox gonad + dist gonad	3	0
1659	N2	wildtype	1	JU1325	Heterospecific	1	43	71	413	2	2	2	2	2	0	1	all	7	prox gonad + dist gonad	3	0
18	AD186	egg-1	2	JU1325	Heterospecific	1	47	40	385	1	3	0	1	1	0	1	prox ut +dist ut	4	prox gonad + dist gonad	3	0
197	AD186	egg-1	2	JU1325	Heterospecific	1	43	29	370	3	3	2	2	1	0	1	all	7	prox gonad + dist gonad	3	0
669	AU98	inx-14	3	JU1325	Heterospecific	1	47	80	300	2	3	1	1	1	0	1	all	7	prox gonad + dist gonad	3	0
405	BA671	spe-9	4	JU1325	Heterospecific	1	45	72	384	3	3	2	2	2	0	1	all	7	prox gonad + dist gonad	3	0
483	BA671	spe-9	4	JU1325	Heterospecific	1	46	69	380	3	3	1	1	1	0	1	all	7	prox gonad + dist gonad	3	0
484	BA671	spe-9	4	JU1325	Heterospecific	1	46	69	380	3	3	1	1	1	0	1	all	7	prox gonad + dist gonad	3	0
485	BA671	spe-9	4	JU1325	Heterospecific	1	46	69	380	2	3	1	1	1	0	1	all	7	prox gonad + dist gonad	3	0
1132	BA671	spe-9	4	JU1325	Heterospecific	1	48	82	355	2	2	2	2	2	0	1	all	7	prox gonad + dist gonad	3	0
1136	BA671	spe-9	4	JU1325	Heterospecific	1	48	82	355	2	2	2	1	1	0	1	all	7	prox gonad + dist gonad	3	0
417	CB1370	daf-2	5	JU1325	Heterospecific	1	42	61	416	2	3	3	2	1	0	1	all	7	prox gonad + dist gonad	3	0
419	CB1370	daf-2	5	JU1325	Heterospecific	1	42	61	416	2	3	2	1	1	0	1	all	7	prox gonad + dist gonad	3	0
447	CB1370	daf-2	5	JU1325	Heterospecific	1	48	70	344	3	3	2	1	1	0	1	all	7	prox gonad + dist gonad	3	0
449	CB1370	daf-2	5	JU1325	Heterospecific	1	48	70	344	2	3	2	1	1	0	1	all	7	prox gonad + dist gonad	3	0
452	CB1370	daf-2	5	JU1325	Heterospecific	1	48	70	344	3	3	2	1	1	0	1	all	7	prox gonad + dist gonad	3	0
19	CZ337	vab-1	7	JU1325	Heterospecific	1	40	41	393	2	3	1	1	1	0	1	all	7	prox gonad + dist gonad	3	0
387	CZ337	vab-1	7	JU1325	Heterospecific	1	47	71	363	2	3	1	1	1	0	1	all	7	prox gonad + dist gonad	3	0
390	CZ337	vab-1	7	JU1325	Heterospecific	1	47	71	363	3	3	2	1	1	0	1	all	7	prox gonad + dist gonad	3	0
913	CZ337	vab-1	7	JU1325	Heterospecific	1	44	72	339	3	3	2	1	1	0	1	all	7	prox gonad + dist gonad	3	0
915	CZ337	vab-1	7	JU1325	Heterospecific	1	44	72	339	3	3	2	2	2	0	1	all	7	prox gonad + dist gonad	3	0
917	CZ337	vab-1	7	JU1325	Heterospecific	1	44	72	339	2	3	2	2	1	0	1	all	7	prox gonad + dist gonad	3	0
921	CZ337	vab-1	7	JU1325	Heterospecific	1	44	72	339	3	3	2	1	1	0	1	all	7	prox gonad + dist gonad	3	0
256	DG1604	ceh-18;fog-2	8	JU1325	Heterospecific	1	44	68	318	2	3	2	1	1	0	1	all	7	prox gonad + dist gonad	3	0
260	DG1604	ceh-18;fog-2	8	JU1325	Heterospecific	1	44	68	318	3	3	2	2	2	0	1	all	7	prox gonad + dist gonad	3	0
431	DG1612	vab-1;fog-2	9	JU1325	Heterospecific	1	48	68	322	1	2	1	2	1	0	1	all	7	prox gonad + dist gonad	3	0
433	DG1612	vab-1;fog-2	9	JU1325	Heterospecific	1	48	68	322	2	3	1	1	1	0	1	all	7	prox gonad + dist gonad	3	0
1032	DG1612	vab-1;fog-2	9	JU1325	Heterospecific	1	52	82	306	2	2	2	1	1	0	1	all	7	prox gonad + dist gonad	3	0
1333	DG1612	vab-1;fog-2	9	JU1325	Heterospecific	1	50	84	414	2	2	1	1	1	0	1	all	7	prox gonad + dist gonad	3	0
1430	DG1612	vab-1;fog-2	9	JU1325	Heterospecific	1	58	77	333	2	2	2	1	1	0	1	all	7	prox gonad + dist gonad	3	0
1432	DG1612	vab-1;fog-2	9	JU1325	Heterospecific	1	58	77	333	2	2	2	1	1	0	1	all	7	prox gonad + dist gonad	3	0
1	GR1034	ceh-18	10	JU1325	Heterospecific	1	49	39	348	0	3	0	2	1	0	1	dist ut only	2	prox gonad + dist gonad	3	0
214	GR1034	ceh-18	10	JU1325	Heterospecific	1	42	37	380	3	3	2	1	1	0	1	all	7	prox gonad + dist gonad	3	0
215	GR1034	ceh-18	10	JU1325	Heterospecific	1	42	37	380	3	3	2	1	1	0	1	all	7	prox gonad + dist gonad	3	0
622	GR1034	ceh-18	10	JU1325	Heterospecific	1	48	73	461	2	2	1	1	1	0	1	all	7	prox gonad + dist gonad	3	0
623	GR1034	ceh-18	10	JU1325	Heterospecific	1	48	73	461	3	3	2	1	1	0	1	all	7	prox gonad + dist gonad	3	0
628	GR1034	ceh-18	10	JU1325	Heterospecific	1	48	73	461	3	3	1	1	1	0	1	all	7	prox gonad + dist gonad	3	0
630	GR1034	ceh-18	10	JU1325	Heterospecific	1	48	73	461	2	3	1	1	1	0	1	all	7	prox gonad + dist gonad	3	0
1614	GR1034	ceh-18	10	JU1325	Heterospecific	1	43	74	376	2	2	2	2	1	0	1	all	7	prox gonad + dist gonad	3	0
534	MT9940	dpl-1	11	JU1325	Heterospecific	1	52	66	375	3	3	1	1	1	0	1	all	7	prox gonad + dist gonad	3	0
774	MT9940	dpl-1	11	JU1325	Heterospecific	1	46	69	371	1	3	1	1	1	0	1	all	7	prox gonad + dist gonad	3	0
1090	MT9940	dpl-1	11	JU1325	Heterospecific	1	49	80	383	2	2	1	1	1	0	1	all	7	prox gonad + dist gonad	3	0
1092	MT9940	dpl-1	11	JU1325	Heterospecific	1	49	80	383	2	2	2	1	1	0	1	all	7	prox gonad + dist gonad	3	0
1093	MT9940	dpl-1	11	JU1325	Heterospecific	1	49	80	383	2	2	1	1	1	0	1	all	7	prox gonad + dist gonad	3	0
1100	MT9940	dpl-1	11	JU1325	Heterospecific	1	49	80	383	2	2	1	1	1	0	1	all	7	prox gonad + dist gonad	3	0
1105	MT9940	dpl-1	11	JU1325	Heterospecific	1	49	80	383	2	2	1	1	1	0	1	all	7	prox gonad + dist gonad	3	0
180	MT11691	efl-1	13	JU1325	Heterospecific	1	44	33	336	1	3	2	1	1	0	1	all	7	prox gonad + dist gonad	3	0
272	MT11691	efl-1	13	JU1325	Heterospecific	1	43	68	341	3	3	2	1	1	0	1	all	7	prox gonad + dist gonad	3	0
274	MT11691	efl-1	13	JU1325	Heterospecific	1	43	68	341	1	3	1	1	1	0	1	all	7	prox gonad + dist gonad	3	0
278	MT11691	efl-1	13	JU1325	Heterospecific	1	43	68	341	2	3	2	1	1	0	1	all	7	prox gonad + dist gonad	3	0
815	MT11691	efl-1	13	JU1325	Heterospecific	1	43	71	430	3	3	1	1	1	0	1	all	7	prox gonad + dist gonad	3	0
816	MT11691	efl-1	13	JU1325	Heterospecific	1	43	71	430	3	3	2	1	1	0	1	all	7	prox gonad + dist gonad	3	0
818	MT11691	efl-1	13	JU1325	Heterospecific	1	43	71	430	1	1	2	1	1	0	1	all	7	prox gonad + dist gonad	3	0
822	MT11691	efl-1	13	JU1325	Heterospecific	1	43	71	430	2	3	1	1	1	0	1	all	7	prox gonad + dist gonad	3	0
577	PS2368	itr-1(sy327)	14	JU1325	Heterospecific	1	49	70	419	2	3	2	2	2	0	1	all	7	prox gonad + dist gonad	3	0
578	PS2368	itr-1(sy327)	14	JU1325	Heterospecific	1	49	70	419	2	3	1	1	1	0	1	all	7	prox gonad + dist gonad	3	0
588	PS2368	itr-1(sy327)	14	JU1325	Heterospecific	1	49	70	419	1	3	1	1	1	0	1	all	7	prox gonad + dist gonad	3	0
686	PS2368	itr-1(sy327)	14	JU1325	Heterospecific	1	46	78	320	3	3	1	1	1	0	1	all	7	prox gonad + dist gonad	3	0
134	PS3653	ipp-5	15	JU1325	Heterospecific	1	41	34	300	2	3	2	1	1	0	1	all	7	prox gonad + dist gonad	3	0
136	PS3653	ipp-5	15	JU1325	Heterospecific	1	41	34	300	3	3	2	1	1	0	1	all	7	prox gonad + dist gonad	3	0
138	PS3653	ipp-5	15	JU1325	Heterospecific	1	41	34	300	2	3	1	1	1	0	1	all	7	prox gonad + dist gonad	3	0
544	PS3653	ipp-5	15	JU1325	Heterospecific	1	51	68	385	2	3	2	1	1	0	1	all	7	prox gonad + dist gonad	3	0
550	PS3653	ipp-5	15	JU1325	Heterospecific	1	51	68	385	3	3	2	1	1	0	1	all	7	prox gonad + dist gonad	3	0
882	PS3653	ipp-5	15	JU1325	Heterospecific	1	46	72	297	2	3	2	1	1	0	1	all	7	prox gonad + dist gonad	3	0
883	PS3653	ipp-5	15	JU1325	Heterospecific	1	46	72	297	3	3	1	1	2	0	1	all	7	prox gonad + dist gonad	3	0
884	PS3653	ipp-5	15	JU1325	Heterospecific	1	46	72	297	3	3	2	1	1	0	1	all	7	prox gonad + dist gonad	3	0
885	PS3653	ipp-5	15	JU1325	Heterospecific	1	46	72	297	3	3	1	1	1	0	1	all	7	prox gonad + dist gonad	3	0
653	PS4112	plc-1	16	JU1325	Heterospecific	1	47	79	283	1	2	1	1	1	0	1	all	7	prox gonad + dist gonad	3	0
655	PS4112	plc-1	16	JU1325	Heterospecific	1	47	79	283	3	3	2	2	1	0	1	all	7	prox gonad + dist gonad	3	0
657	PS4112	plc-1	16	JU1325	Heterospecific	1	47	79	283	1	3	2	1	1	0	1	all	7	prox gonad + dist gonad	3	0
659	PS4112	plc-1	16	JU1325	Heterospecific	1	47	79	283	3	3	2	1	1	0	1	all	7	prox gonad + dist gonad	3	0
857	PS4112	plc-1	16	JU1325	Heterospecific	1	47	74	257	2	3	2	2	1	0	1	all	7	prox gonad + dist gonad	3	0
858	PS4112	plc-1	16	JU1325	Heterospecific	1	47	74	257	3	3	2	2	1	0	1	all	7	prox gonad + dist gonad	3	0
860	PS4112	plc-1	16	JU1325	Heterospecific	1	47	74	257	2	2	1	1	1	0	1	all	7	prox gonad + dist gonad	3	0
861	PS4112	plc-1	16	JU1325	Heterospecific	1	47	74	257	3	3	1	1	1	0	1	all	7	prox gonad + dist gonad	3	0
14	PS4330	spe-41	17	JU1325	Heterospecific	1	46	41	376	2	3	2	2	1	0	1	all	7	prox gonad + dist gonad	3	0
1178	PS4330	spe-41	17	JU1325	Heterospecific	1	43	82	403	2	2	1	1	1	0	1	all	7	prox gonad + dist gonad	3	0
1181	PS4330	spe-41	17	JU1325	Heterospecific	1	43	82	403	2	2	1	1	1	0	1	all	7	prox gonad + dist gonad	3	0
798	RB1353	spv-1	18	JU1325	Heterospecific	1	44	72	408	2	2	1	1	1	0	1	all	7	prox gonad + dist gonad	3	0
800	RB1353	spv-1	18	JU1325	Heterospecific	1	44	72	408	2	2	1	1	1	0	1	all	7	prox gonad + dist gonad	3	0
1589	RB1353	spv-1	18	JU1325	Heterospecific	1	45	75	355	2	2	1	1	2	0	1	all	7	prox gonad + dist gonad	3	0
1591	RB1353	spv-1	18	JU1325	Heterospecific	1	45	75	355	2	2	2	2	1	0	1	all	7	prox gonad + dist gonad	3	0
1593	RB1353	spv-1	18	JU1325	Heterospecific	1	45	75	355	2	2	2	1	1	0	1	all	7	prox gonad + dist gonad	3	0
368	RB1823	gst-4	19	JU1325	Heterospecific	1	47	70	344	3	3	2	1	1	0	1	all	7	prox gonad + dist gonad	3	0
760	RB1823	gst-4	19	JU1325	Heterospecific	1	46	70	354	2	2	1	1	1	0	1	all	7	prox gonad + dist gonad	3	0
467	SL1138	spe-42	20	JU1325	Heterospecific	1	47	70	364	2	2	1	1	1	0	1	all	7	prox gonad + dist gonad	3	0
1073	SL1138	spe-42	20	JU1325	Heterospecific	1	50	81	360	2	2	1	1	1	0	1	all	7	prox gonad + dist gonad	3	0
1074	SL1138	spe-42	20	JU1325	Heterospecific	1	50	81	360	2	2	1	1	1	0	1	all	7	prox gonad + dist gonad	3	0
239	TX183	oma-1,2	21	JU1325	Heterospecific	1	45	68	302	2	3	2	2	1	0	1	all	7	prox gonad + dist gonad	3	0
513	TX183	oma-1,2	21	JU1325	Heterospecific	1	44	71	409	3	3	2	2	1	0	1	all	7	prox gonad + dist gonad	3	0
1119	TX183	oma-1,2	21	JU1325	Heterospecific	1	50	82	327	2	2	1	1	1	0	1	all	7	prox gonad + dist gonad	3	0
1120	TX183	oma-1,2	21	JU1325	Heterospecific	1	50	82	327	2	2	2	2	2	0	1	all	7	prox gonad + dist gonad	3	0
1122	TX183	oma-1,2	21	JU1325	Heterospecific	1	50	82	327	2	2	1	1	1	0	1	all	7	prox gonad + dist gonad	3	0
1123	TX183	oma-1,2	21	JU1325	Heterospecific	1	50	82	327	2	2	1	1	1	0	1	all	7	prox gonad + dist gonad	3	0
91	JT73	itr-1(sa73)	22	JU1325	Heterospecific	1	49	39	369	3	3	1	1	1	0	1	all	7	prox gonad + dist gonad	3	0
611	JT73	itr-1(sa73)	22	JU1325	Heterospecific	1	49	71	445	3	3	2	1	1	0	1	all	7	prox gonad + dist gonad	3	0
1043	JT73	itr-1(sa73)	22	JU1325	Heterospecific	1	52	80	339	2	2	2	2	1	0	1	all	7	prox gonad + dist gonad	3	0
1045	JT73	itr-1(sa73)	22	JU1325	Heterospecific	1	52	80	339	2	2	2	2	1	0	1	all	7	prox gonad + dist gonad	3	0
1049	JT73	itr-1(sa73)	22	JU1325	Heterospecific	1	52	80	339	3	3	2	1	1	0	1	all	7	prox gonad + dist gonad	3	0
1050	JT73	itr-1(sa73)	22	JU1325	Heterospecific	1	52	80	339	1	2	1	1	1	0	1	all	7	prox gonad + dist gonad	3	0
1056	JT73	itr-1(sa73)	22	JU1325	Heterospecific	1	52	80	339	3	3	2	2	1	0	1	all	7	prox gonad + dist gonad	3	0
559	DH1390	rme-2	23	JU1325	Heterospecific	1	50	69	399	2	3	2	1	1	0	1	all	7	prox gonad + dist gonad	3	0
565	DH1390	rme-2	23	JU1325	Heterospecific	1	50	69	399	3	3	2	1	1	0	1	all	7	prox gonad + dist gonad	3	0
1302	BX17	fat-4	24	JU1325	Heterospecific	1	51	85	396	2	2	1	1	1	0	1	all	7	prox gonad + dist gonad	3	0
1306	BX17	fat-4	24	JU1325	Heterospecific	1	51	85	396	2	2	1	1	1	0	1	all	7	prox gonad + dist gonad	3	0
1405	BX17	fat-4	24	JU1325	Heterospecific	1	61	78	316	2	3	2	1	1	0	1	all	7	prox gonad + dist gonad	3	0
1407	BX17	fat-4	24	JU1325	Heterospecific	1	61	78	316	2	2	2	1	1	0	1	all	7	prox gonad + dist gonad	3	0
1408	BX17	fat-4	24	JU1325	Heterospecific	1	61	78	316	2	2	2	2	1	0	1	all	7	prox gonad + dist gonad	3	0
1412	BX17	fat-4	24	JU1325	Heterospecific	1	61	78	316	2	3	2	1	1	0	1	all	7	prox gonad + dist gonad	3	0
1215	BX24	fat-1	25	JU1325	Heterospecific	1	55	84	298	2	2	1	1	1	0	1	all	7	prox gonad + dist gonad	3	0
1216	BX24	fat-1	25	JU1325	Heterospecific	1	55	84	298	3	3	2	2	2	0	1	all	7	prox gonad + dist gonad	3	0
1223	BX24	fat-1	25	JU1325	Heterospecific	1	55	84	298	2	2	2	1	1	0	1	all	7	prox gonad + dist gonad	3	0
1530	BX24	fat-1	25	JU1325	Heterospecific	1	53	86	400	2	2	2	1	1	0	1	all	7	prox gonad + dist gonad	3	0
1368	BX26	fat-2	26	JU1325	Heterospecific	1	58	77	287	2	2	2	2	1	0	1	all	7	prox gonad + dist gonad	3	0
1380	BX26	fat-2	26	JU1325	Heterospecific	1	58	77	287	2	3	2	2	2	0	1	all	7	prox gonad + dist gonad	3	0
1557	BX26	fat-2	26	JU1325	Heterospecific	1	46	76	326	3	3	2	2	1	0	1	all	7	prox gonad + dist gonad	3	0
1560	BX26	fat-2	26	JU1325	Heterospecific	1	46	76	326	2	2	2	1	1	0	1	all	7	prox gonad + dist gonad	3	0
1562	BX26	fat-2	26	JU1325	Heterospecific	1	46	76	326	2	3	2	2	1	0	1	all	7	prox gonad + dist gonad	3	0
1563	BX26	fat-2	26	JU1325	Heterospecific	1	46	76	326	2	2	2	2	2	0	1	all	7	prox gonad + dist gonad	3	0
1437	BX30	fat-3	27	JU1325	Heterospecific	1	55	82	359	2	2	2	2	1	0	1	all	7	prox gonad + dist gonad	3	0
1438	BX30	fat-3	27	JU1325	Heterospecific	1	55	82	359	2	2	2	1	1	0	1	all	7	prox gonad + dist gonad	3	0
1443	BX30	fat-3	27	JU1325	Heterospecific	1	55	82	359	2	2	2	1	1	0	1	all	7	prox gonad + dist gonad	3	0
1447	BX30	fat-3	27	JU1325	Heterospecific	1	55	82	359	2	2	1	1	1	0	1	all	7	prox gonad + dist gonad	3	0
1454	BX30	fat-3	27	JU1325	Heterospecific	1	55	82	359	2	2	2	1	1	0	1	all	7	prox gonad + dist gonad	3	0
1455	BX30	fat-3	27	JU1325	Heterospecific	1	55	82	359	2	2	2	1	1	0	1	all	7	prox gonad + dist gonad	3	0
1461	BX30	fat-3	27	JU1325	Heterospecific	1	55	82	359	2	2	2	1	1	0	1	all	7	prox gonad + dist gonad	3	0
1257	BX52	fat-1,4	28	JU1325	Heterospecific	1	54	84	363	2	2	2	1	1	0	1	all	7	prox gonad + dist gonad	3	0
1258	BX52	fat-1,4	28	JU1325	Heterospecific	1	54	84	363	2	3	2	1	1	0	1	all	7	prox gonad + dist gonad	3	0
1259	BX52	fat-1,4	28	JU1325	Heterospecific	1	54	84	363	3	3	1	1	1	0	1	all	7	prox gonad + dist gonad	3	0
1263	BX52	fat-1,4	28	JU1325	Heterospecific	1	54	84	363	2	2	2	2	1	0	1	all	7	prox gonad + dist gonad	3	0
1500	BX52	fat-1,4	28	JU1325	Heterospecific	1	55	86	385	2	2	2	2	1	0	1	all	7	prox gonad + dist gonad	3	0
1505	BX52	fat-1,4	28	JU1325	Heterospecific	1	55	86	385	2	3	1	1	1	0	1	all	7	prox gonad + dist gonad	3	0
1507	BX52	fat-1,4	28	JU1325	Heterospecific	1	55	86	385	2	2	1	1	1	0	1	all	7	prox gonad + dist gonad	3	0
1508	BX52	fat-1,4	28	JU1325	Heterospecific	1	55	86	385	2	3	2	1	1	0	1	all	7	prox gonad + dist gonad	3	0
1514	BX52	fat-1,4	28	JU1325	Heterospecific	1	55	86	385	2	3	2	1	1	0	1	all	7	prox gonad + dist gonad	3	0
1515	BX52	fat-1,4	28	JU1325	Heterospecific	1	55	86	385	2	2	2	1	1	0	1	all	7	prox gonad + dist gonad	3	0
1516	BX52	fat-1,4	28	JU1325	Heterospecific	1	55	86	385	2	2	2	2	2	0	1	all	7	prox gonad + dist gonad	3	0
308	N2	wildtype	1	JU1325	Heterospecific	1	41	68	381	2	3	1	0	0	1	1	all	7	soma only	4	1
355	AU98	inx-14	3	JU1325	Heterospecific	1	48	70	324	3	3	2	0	0	1	1	all	7	soma only	4	1
258	DG1604	ceh-18;fog-2	8	JU1325	Heterospecific	1	44	68	318	2	3	1	0	0	1	1	all	7	soma only	4	1
1029	DG1612	vab-1;fog-2	9	JU1325	Heterospecific	1	52	82	306	2	2	1	0	0	1	1	all	7	soma only	4	1
176	MT9940	dpl-1	11	JU1325	Heterospecific	1	37	37	373	3	3	1	0	0	1	1	all	7	soma only	4	1
881	PS3653	ipp-5	15	JU1325	Heterospecific	1	46	72	297	3	3	0	0	0	1	1	prox ut +dist ut	4	soma only	4	1
652	PS4112	plc-1	16	JU1325	Heterospecific	1	47	79	283	2	3	1	0	0	1	1	all	7	soma only	4	1
600	PS4330	spe-41	17	JU1325	Heterospecific	1	49	71	433	2	2	1	0	0	1	1	all	7	soma only	4	1
749	RB1823	gst-4	19	JU1325	Heterospecific	1	46	70	354	2	2	1	0	0	1	1	all	7	soma only	4	1
751	RB1823	gst-4	19	JU1325	Heterospecific	1	46	70	354	3	3	2	0	0	1	1	all	7	soma only	4	1
1292	BX17	fat-4	24	JU1325	Heterospecific	1	51	85	396	3	3	0	0	0	1	1	prox ut +dist ut	4	soma only	4	1
1038	DG1612	vab-1;fog-2	9	JK574	Conspecific	0	52	83	316	2	2	2	1	0	1	1	all	7	prox gonad + soma	5	1
980	AD186	egg-1	2	JU1325	Heterospecific	1	48	79	355	3	3	2	1	0	1	1	all	7	prox gonad + soma	5	1
346	AU98	inx-14	3	JU1325	Heterospecific	1	48	70	324	3	3	2	1	0	1	1	all	7	prox gonad + soma	5	1
673	AU98	inx-14	3	JU1325	Heterospecific	1	47	80	300	3	3	2	1	0	1	1	all	7	prox gonad + soma	5	1
145	BA671	spe-9	4	JU1325	Heterospecific	1	39	35	316	3	3	1	1	0	1	1	all	7	prox gonad + soma	5	1
1145	BA671	spe-9	4	JU1325	Heterospecific	1	48	82	355	2	2	2	2	0	2	1	all	7	prox gonad + soma	5	1
1146	BA671	spe-9	4	JU1325	Heterospecific	1	48	82	355	2	2	2	2	0	1	1	all	7	prox gonad + soma	5	1
919	CZ337	vab-1	7	JU1325	Heterospecific	1	44	72	339	3	3	2	1	0	1	1	all	7	prox gonad + soma	5	1
772	MT9940	dpl-1	11	JU1325	Heterospecific	1	46	69	371	1	2	1	1	0	1	1	all	7	prox gonad + soma	5	1
1096	MT9940	dpl-1	11	JU1325	Heterospecific	1	49	80	383	1	2	2	1	0	1	1	all	7	prox gonad + soma	5	1
1097	MT9940	dpl-1	11	JU1325	Heterospecific	1	49	80	383	2	2	1	1	0	1	1	all	7	prox gonad + soma	5	1
181	MT11691	efl-1	13	JU1325	Heterospecific	1	44	33	336	1	3	2	1	0	1	1	all	7	prox gonad + soma	5	1
688	PS2368	itr-1(sy327)	14	JU1325	Heterospecific	1	46	78	320	2	3	2	1	0	1	1	all	7	prox gonad + soma	5	1
1187	PS4330	spe-41	17	JU1325	Heterospecific	1	43	82	403	2	2	2	2	0	2	1	all	7	prox gonad + soma	5	1
371	RB1823	gst-4	19	JU1325	Heterospecific	1	47	70	344	3	2	1	1	0	1	1	all	7	prox gonad + soma	5	1
758	RB1823	gst-4	19	JU1325	Heterospecific	1	46	70	354	1	2	1	1	0	1	1	all	7	prox gonad + soma	5	1
1340	SL1138	spe-42	20	JU1325	Heterospecific	1	48	85	427	3	3	1	1	0	1	1	all	7	prox gonad + soma	5	1
1341	SL1138	spe-42	20	JU1325	Heterospecific	1	48	85	427	2	2	1	1	0	1	1	all	7	prox gonad + soma	5	1
240	TX183	oma-1,2	21	JU1325	Heterospecific	1	45	68	302	3	3	2	1	0	1	1	all	7	prox gonad + soma	5	1
1374	BX26	fat-2	26	JU1325	Heterospecific	1	58	77	287	1	2	1	1	0	1	1	all	7	prox gonad + soma	5	1
1444	BX30	fat-3	27	JU1325	Heterospecific	1	55	82	359	2	2	1	1	0	1	1	all	7	prox gonad + soma	5	1
1255	BX52	fat-1,4	28	JU1325	Heterospecific	1	54	84	363	2	3	2	1	0	1	1	all	7	prox gonad + soma	5	1
706	DG1604	ceh-18;fog-2	8	JU1325	Heterospecific	1	47	79	348	2	2	1	0	1	1	1	all	7	dist gonad + soma	6	1
1019	DG1604	ceh-18;fog-2	8	JU1325	Heterospecific	1	52	75	293	2	2	1	0	1	1	1	all	7	dist gonad + soma	6	1
1076	SL1138	spe-42	20	JU1325	Heterospecific	1	50	81	360	2	2	1	0	1	1	1	all	7	dist gonad + soma	6	1
173	N2	wildtype	1	JK574	Conspecific	0	38	38	362	2	3	2	1	1	1	1	all	7	all	7	1
1673	N2	wildtype	1	JK574	Conspecific	0	43	71	422	2	2	2	2	2	2	1	all	7	all	7	1
299	AD186	egg-1	2	JK574	Conspecific	0	41	68	370	2	2	1	1	1	1	1	all	7	all	7	1
365	AU98	inx-14	3	JK574	Conspecific	0	48	70	331	3	3	2	2	2	1	1	all	7	all	7	1
411	BA671	spe-9	4	JK574	Conspecific	0	45	72	392	3	3	3	2	2	1	1	all	7	all	7	1
395	CZ337	vab-1	7	JK574	Conspecific	0	47	71	373	2	2	1	1	1	1	1	all	7	all	7	1
444	DG1612	vab-1;fog-2	9	JK574	Conspecific	0	48	68	333	1	2	2	1	1	1	1	all	7	all	7	1
1040	DG1612	vab-1;fog-2	9	JK574	Conspecific	0	52	83	316	2	2	1	1	1	1	1	all	7	all	7	1
1337	DG1612	vab-1;fog-2	9	JK574	Conspecific	0	50	86	418	2	3	3	1	1	1	1	all	7	all	7	1
590	PS2368	itr-1(sy327)	14	JK574	Conspecific	0	49	71	425	2	2	1	1	1	1	1	all	7	all	7	1
1192	PS4330	spe-41	17	JK574	Conspecific	0	43	81	413	2	2	1	1	1	1	1	all	7	all	7	1
376	RB1823	gst-4	19	JK574	Conspecific	0	47	71	350	3	3	1	1	1	1	1	all	7	all	7	1
767	RB1823	gst-4	19	JK574	Conspecific	0	46	70	361	3	3	2	1	1	2	1	all	7	all	7	1
974	TX183	oma-1,2	21	JK574	Conspecific	0	47	75	342	3	3	2	2	1	1	1	all	7	all	7	1
1126	TX183	oma-1,2	21	JK574	Conspecific	0	50	82	336	2	2	1	1	1	1	1	all	7	all	7	1
1319	BX17	fat-4	24	JK574	Conspecific	0	51	85	410	2	2	2	1	1	2	1	all	7	all	7	1
1324	BX17	fat-4	24	JK574	Conspecific	0	51	85	410	2	2	2	1	1	2	1	all	7	all	7	1
1429	BX17	fat-4	24	JK574	Conspecific	0	61	78	323	2	2	2	2	2	2	1	all	7	all	7	1
1387	BX26	fat-2	26	JK574	Conspecific	0	58	78	301	2	2	2	1	1	1	1	all	7	all	7	1
1491	BX30	fat-3	27	JK574	Conspecific	0	55	86	368	2	3	2	2	1	1	1	all	7	all	7	1
165	N2	wildtype	1	JU1325	Heterospecific	1	38	37	354	2	3	2	1	1	1	1	all	7	all	7	1
312	N2	wildtype	1	JU1325	Heterospecific	1	41	68	381	2	3	2	1	1	2	1	all	7	all	7	1
313	N2	wildtype	1	JU1325	Heterospecific	1	41	68	381	2	3	1	1	1	1	1	all	7	all	7	1
499	N2	wildtype	1	JU1325	Heterospecific	1	44	71	396	3	3	2	2	1	1	1	all	7	all	7	1
501	N2	wildtype	1	JU1325	Heterospecific	1	44	71	396	1	3	2	1	1	1	1	all	7	all	7	1
721	N2	wildtype	1	JU1325	Heterospecific	1	45	79	369	3	3	1	2	2	1	1	all	7	all	7	1
724	N2	wildtype	1	JU1325	Heterospecific	1	45	79	369	2	3	1	2	1	1	1	all	7	all	7	1
725	N2	wildtype	1	JU1325	Heterospecific	1	45	79	369	2	2	1	1	1	1	1	all	7	all	7	1
728	N2	wildtype	1	JU1325	Heterospecific	1	45	79	369	3	3	1	1	1	1	1	all	7	all	7	1
996	N2	wildtype	1	JU1325	Heterospecific	1	48	81	373	3	3	2	2	1	1	1	all	7	all	7	1
998	N2	wildtype	1	JU1325	Heterospecific	1	48	81	373	3	3	2	2	2	1	1	all	7	all	7	1
999	N2	wildtype	1	JU1325	Heterospecific	1	48	81	373	3	3	2	1	1	1	1	all	7	all	7	1
1004	N2	wildtype	1	JU1325	Heterospecific	1	48	81	373	3	3	2	2	2	2	1	all	7	all	7	1
1202	N2	wildtype	1	JU1325	Heterospecific	1	42	82	419	2	2	1	1	1	1	1	all	7	all	7	1
1204	N2	wildtype	1	JU1325	Heterospecific	1	42	82	419	2	2	2	1	1	1	1	all	7	all	7	1
1205	N2	wildtype	1	JU1325	Heterospecific	1	42	82	419	2	2	1	1	1	1	1	all	7	all	7	1
1353	N2	wildtype	1	JU1325	Heterospecific	1	47	86	437	2	3	2	1	1	1	1	all	7	all	7	1
1355	N2	wildtype	1	JU1325	Heterospecific	1	47	86	437	2	2	2	1	1	1	1	all	7	all	7	1
1357	N2	wildtype	1	JU1325	Heterospecific	1	47	86	437	2	3	2	2	2	2	1	all	7	all	7	1
1358	N2	wildtype	1	JU1325	Heterospecific	1	47	86	437	3	3	2	1	1	1	1	all	7	all	7	1
1655	N2	wildtype	1	JU1325	Heterospecific	1	43	71	413	2	2	2	1	1	1	1	all	7	all	7	1
1658	N2	wildtype	1	JU1325	Heterospecific	1	43	71	413	2	2	2	1	1	1	1	all	7	all	7	1
199	AD186	egg-1	2	JU1325	Heterospecific	1	43	29	370	3	3	1	1	1	1	1	all	7	all	7	1
200	AD186	egg-1	2	JU1325	Heterospecific	1	43	29	370	3	3	3	1	1	1	1	all	7	all	7	1
291	AD186	egg-1	2	JU1325	Heterospecific	1	41	68	359	3	3	1	1	1	1	1	all	7	all	7	1
292	AD186	egg-1	2	JU1325	Heterospecific	1	41	68	359	3	3	2	2	1	1	1	all	7	all	7	1
293	AD186	egg-1	2	JU1325	Heterospecific	1	41	68	359	3	3	1	1	1	1	1	all	7	all	7	1
294	AD186	egg-1	2	JU1325	Heterospecific	1	41	68	359	3	3	1	1	1	1	1	all	7	all	7	1
979	AD186	egg-1	2	JU1325	Heterospecific	1	48	79	355	2	3	2	1	1	1	1	all	7	all	7	1
983	AD186	egg-1	2	JU1325	Heterospecific	1	48	79	355	3	3	2	2	1	1	1	all	7	all	7	1
986	AD186	egg-1	2	JU1325	Heterospecific	1	48	79	355	3	3	2	2	1	1	1	all	7	all	7	1
354	AU98	inx-14	3	JU1325	Heterospecific	1	48	70	324	3	3	2	1	1	1	1	all	7	all	7	1
357	AU98	inx-14	3	JU1325	Heterospecific	1	48	70	324	3	3	2	1	1	1	1	all	7	all	7	1
144	BA671	spe-9	4	JU1325	Heterospecific	1	39	35	316	3	3	2	1	1	1	1	all	7	all	7	1
403	BA671	spe-9	4	JU1325	Heterospecific	1	45	72	384	3	3	1	1	1	1	1	all	7	all	7	1
404	BA671	spe-9	4	JU1325	Heterospecific	1	45	72	384	3	3	2	2	2	2	1	all	7	all	7	1
406	BA671	spe-9	4	JU1325	Heterospecific	1	45	72	384	3	3	2	1	1	1	1	all	7	all	7	1
407	BA671	spe-9	4	JU1325	Heterospecific	1	45	72	384	3	3	2	2	1	1	1	all	7	all	7	1
486	BA671	spe-9	4	JU1325	Heterospecific	1	46	69	380	1	3	2	1	1	1	1	all	7	all	7	1
487	BA671	spe-9	4	JU1325	Heterospecific	1	46	69	380	3	3	2	1	1	1	1	all	7	all	7	1
739	BA671	spe-9	4	JU1325	Heterospecific	1	47	69	332	3	3	1	2	1	1	1	all	7	all	7	1
740	BA671	spe-9	4	JU1325	Heterospecific	1	47	69	332	3	3	1	1	1	1	1	all	7	all	7	1
741	BA671	spe-9	4	JU1325	Heterospecific	1	47	69	332	3	3	1	1	1	1	1	all	7	all	7	1
960	BA671	spe-9	4	JU1325	Heterospecific	1	49	73	325	3	3	1	1	1	2	1	all	7	all	7	1
961	BA671	spe-9	4	JU1325	Heterospecific	1	49	73	325	3	3	2	1	1	1	1	all	7	all	7	1
962	BA671	spe-9	4	JU1325	Heterospecific	1	49	73	325	3	3	2	1	1	1	1	all	7	all	7	1
1134	BA671	spe-9	4	JU1325	Heterospecific	1	48	82	355	2	2	2	2	1	1	1	all	7	all	7	1
1135	BA671	spe-9	4	JU1325	Heterospecific	1	48	82	355	2	2	2	2	1	1	1	all	7	all	7	1
1139	BA671	spe-9	4	JU1325	Heterospecific	1	48	82	355	2	2	2	2	2	1	1	all	7	all	7	1
1141	BA671	spe-9	4	JU1325	Heterospecific	1	48	82	355	2	2	1	1	1	1	1	all	7	all	7	1
1142	BA671	spe-9	4	JU1325	Heterospecific	1	48	82	355	2	2	2	2	2	2	1	all	7	all	7	1
1143	BA671	spe-9	4	JU1325	Heterospecific	1	48	82	355	2	2	2	1	1	1	1	all	7	all	7	1
1144	BA671	spe-9	4	JU1325	Heterospecific	1	48	82	355	2	2	2	2	2	2	1	all	7	all	7	1
1147	BA671	spe-9	4	JU1325	Heterospecific	1	48	82	355	2	2	2	2	1	2	1	all	7	all	7	1
153	CB1370	daf-2	5	JU1325	Heterospecific	1	39	36	331	3	3	2	2	1	1	1	all	7	all	7	1
154	CB1370	daf-2	5	JU1325	Heterospecific	1	39	36	331	3	3	1	1	1	1	1	all	7	all	7	1
155	CB1370	daf-2	5	JU1325	Heterospecific	1	39	36	331	3	3	2	1	1	1	1	all	7	all	7	1
418	CB1370	daf-2	5	JU1325	Heterospecific	1	42	61	416	2	2	1	1	1	1	1	all	7	all	7	1
420	CB1370	daf-2	5	JU1325	Heterospecific	1	42	61	416	3	3	2	2	2	1	1	all	7	all	7	1
421	CB1370	daf-2	5	JU1325	Heterospecific	1	42	61	416	3	3	1	1	1	1	1	all	7	all	7	1
422	CB1370	daf-2	5	JU1325	Heterospecific	1	42	61	416	3	3	2	2	2	1	1	all	7	all	7	1
446	CB1370	daf-2	5	JU1325	Heterospecific	1	48	70	344	2	3	1	2	1	2	1	all	7	all	7	1
448	CB1370	daf-2	5	JU1325	Heterospecific	1	48	70	344	2	3	2	2	1	1	1	all	7	all	7	1
451	CB1370	daf-2	5	JU1325	Heterospecific	1	48	70	344	3	3	2	1	1	1	1	all	7	all	7	1
454	CB1370	daf-2	5	JU1325	Heterospecific	1	48	70	344	2	3	2	2	1	1	1	all	7	all	7	1
930	CB1370	daf-2	5	JU1325	Heterospecific	1	53	68	281	3	3	2	1	1	1	1	all	7	all	7	1
931	CB1370	daf-2	5	JU1325	Heterospecific	1	53	68	281	3	3	1	1	1	1	1	all	7	all	7	1
932	CB1370	daf-2	5	JU1325	Heterospecific	1	53	68	281	3	3	2	1	1	1	1	all	7	all	7	1
384	CZ337	vab-1	7	JU1325	Heterospecific	1	47	71	363	3	3	2	1	1	1	1	all	7	all	7	1
386	CZ337	vab-1	7	JU1325	Heterospecific	1	47	71	363	2	3	1	1	1	1	1	all	7	all	7	1
389	CZ337	vab-1	7	JU1325	Heterospecific	1	47	71	363	3	3	2	1	1	1	1	all	7	all	7	1
391	CZ337	vab-1	7	JU1325	Heterospecific	1	47	71	363	3	3	2	1	1	1	1	all	7	all	7	1
914	CZ337	vab-1	7	JU1325	Heterospecific	1	44	72	339	2	2	2	1	1	1	1	all	7	all	7	1
918	CZ337	vab-1	7	JU1325	Heterospecific	1	44	72	339	3	3	2	1	1	1	1	all	7	all	7	1
254	DG1604	ceh-18;fog-2	8	JU1325	Heterospecific	1	44	68	318	3	3	1	1	1	1	1	all	7	all	7	1
255	DG1604	ceh-18;fog-2	8	JU1325	Heterospecific	1	44	68	318	3	3	2	1	1	1	1	all	7	all	7	1
257	DG1604	ceh-18;fog-2	8	JU1325	Heterospecific	1	44	68	318	2	3	1	1	1	1	1	all	7	all	7	1
704	DG1604	ceh-18;fog-2	8	JU1325	Heterospecific	1	47	79	348	2	3	1	1	1	1	1	all	7	all	7	1
705	DG1604	ceh-18;fog-2	8	JU1325	Heterospecific	1	47	79	348	2	3	1	1	1	1	1	all	7	all	7	1
707	DG1604	ceh-18;fog-2	8	JU1325	Heterospecific	1	47	79	348	3	3	1	1	1	1	1	all	7	all	7	1
708	DG1604	ceh-18;fog-2	8	JU1325	Heterospecific	1	47	79	348	2	3	2	1	1	1	1	all	7	all	7	1
953	DG1604	ceh-18;fog-2	8	JU1325	Heterospecific	1	50	71	311	2	2	1	1	1	1	1	all	7	all	7	1
1014	DG1604	ceh-18;fog-2	8	JU1325	Heterospecific	1	52	75	293	2	2	1	1	1	1	1	all	7	all	7	1
1015	DG1604	ceh-18;fog-2	8	JU1325	Heterospecific	1	52	75	293	2	2	2	2	2	2	1	all	7	all	7	1
1016	DG1604	ceh-18;fog-2	8	JU1325	Heterospecific	1	52	75	293	2	2	1	1	1	1	1	all	7	all	7	1
1017	DG1604	ceh-18;fog-2	8	JU1325	Heterospecific	1	52	75	293	2	2	2	1	1	1	1	all	7	all	7	1
1018	DG1604	ceh-18;fog-2	8	JU1325	Heterospecific	1	52	75	293	2	2	2	2	2	2	1	all	7	all	7	1
1020	DG1604	ceh-18;fog-2	8	JU1325	Heterospecific	1	52	75	293	3	3	2	1	1	2	1	all	7	all	7	1
228	DG1612	vab-1;fog-2	9	JU1325	Heterospecific	1	46	68	280	3	3	2	2	2	2	1	all	7	all	7	1
1027	DG1612	vab-1;fog-2	9	JU1325	Heterospecific	1	52	82	306	3	3	2	1	1	2	1	all	7	all	7	1
1030	DG1612	vab-1;fog-2	9	JU1325	Heterospecific	1	52	82	306	2	3	2	1	1	1	1	all	7	all	7	1
1031	DG1612	vab-1;fog-2	9	JU1325	Heterospecific	1	52	82	306	2	2	1	1	1	1	1	all	7	all	7	1
1431	DG1612	vab-1;fog-2	9	JU1325	Heterospecific	1	58	77	333	2	2	2	2	2	2	1	all	7	all	7	1
1433	DG1612	vab-1;fog-2	9	JU1325	Heterospecific	1	58	77	333	2	2	2	2	2	1	1	all	7	all	7	1
2	GR1034	ceh-18	10	JU1325	Heterospecific	1	49	39	348	0	3	0	2	2	2	1	dist ut only	2	all	7	1
4	GR1034	ceh-18	10	JU1325	Heterospecific	1	49	39	348	3	2	1	1	1	1	1	all	7	all	7	1
5	GR1034	ceh-18	10	JU1325	Heterospecific	1	49	39	348	2	3	2	1	1	1	1	all	7	all	7	1
209	GR1034	ceh-18	10	JU1325	Heterospecific	1	42	37	380	3	3	2	2	1	1	1	all	7	all	7	1
627	GR1034	ceh-18	10	JU1325	Heterospecific	1	48	73	461	1	2	1	1	1	1	1	all	7	all	7	1
631	GR1034	ceh-18	10	JU1325	Heterospecific	1	48	73	461	3	3	2	1	1	1	1	all	7	all	7	1
1615	GR1034	ceh-18	10	JU1325	Heterospecific	1	43	74	376	2	2	2	2	1	1	1	all	7	all	7	1
1616	GR1034	ceh-18	10	JU1325	Heterospecific	1	43	74	376	2	3	2	2	1	1	1	all	7	all	7	1
177	MT9940	dpl-1	11	JU1325	Heterospecific	1	37	37	373	3	3	2	1	1	1	1	all	7	all	7	1
773	MT9940	dpl-1	11	JU1325	Heterospecific	1	46	69	371	3	3	2	1	1	1	1	all	7	all	7	1
775	MT9940	dpl-1	11	JU1325	Heterospecific	1	46	69	371	2	2	2	1	1	1	1	all	7	all	7	1
1089	MT9940	dpl-1	11	JU1325	Heterospecific	1	49	80	383	2	2	2	1	1	1	1	all	7	all	7	1
1091	MT9940	dpl-1	11	JU1325	Heterospecific	1	49	80	383	2	2	1	1	1	1	1	all	7	all	7	1
1101	MT9940	dpl-1	11	JU1325	Heterospecific	1	49	80	383	2	2	2	1	1	1	1	all	7	all	7	1
1102	MT9940	dpl-1	11	JU1325	Heterospecific	1	49	80	383	2	2	2	1	1	1	1	all	7	all	7	1
1103	MT9940	dpl-1	11	JU1325	Heterospecific	1	49	80	383	2	2	1	1	1	1	1	all	7	all	7	1
276	MT11691	efl-1	13	JU1325	Heterospecific	1	43	68	341	3	3	2	1	1	1	1	all	7	all	7	1
277	MT11691	efl-1	13	JU1325	Heterospecific	1	43	68	341	3	3	2	1	1	1	1	all	7	all	7	1
279	MT11691	efl-1	13	JU1325	Heterospecific	1	43	68	341	3	3	2	2	1	1	1	all	7	all	7	1
280	MT11691	efl-1	13	JU1325	Heterospecific	1	43	68	341	3	3	1	2	1	1	1	all	7	all	7	1
819	MT11691	efl-1	13	JU1325	Heterospecific	1	43	71	430	3	3	1	2	2	2	1	all	7	all	7	1
820	MT11691	efl-1	13	JU1325	Heterospecific	1	43	71	430	2	3	2	2	2	1	1	all	7	all	7	1
823	MT11691	efl-1	13	JU1325	Heterospecific	1	43	71	430	3	3	2	1	1	1	1	all	7	all	7	1
221	PS2368	itr-1(sy327)	14	JU1325	Heterospecific	1	41	37	394	3	3	1	1	1	1	1	all	7	all	7	1
584	PS2368	itr-1(sy327)	14	JU1325	Heterospecific	1	49	70	419	2	3	1	1	1	1	1	all	7	all	7	1
687	PS2368	itr-1(sy327)	14	JU1325	Heterospecific	1	46	78	320	2	3	1	1	1	1	1	all	7	all	7	1
691	PS2368	itr-1(sy327)	14	JU1325	Heterospecific	1	46	78	320	3	3	1	1	1	1	1	all	7	all	7	1
692	PS2368	itr-1(sy327)	14	JU1325	Heterospecific	1	46	78	320	3	3	2	1	1	1	1	all	7	all	7	1
543	PS3653	ipp-5	15	JU1325	Heterospecific	1	51	68	385	3	3	2	2	1	1	1	all	7	all	7	1
880	PS3653	ipp-5	15	JU1325	Heterospecific	1	46	72	297	2	3	2	1	1	1	1	all	7	all	7	1
886	PS3653	ipp-5	15	JU1325	Heterospecific	1	46	72	297	3	3	2	2	2	2	1	all	7	all	7	1
1631	PS3653	ipp-5	15	JU1325	Heterospecific	1	41	72	395	3	3	2	2	1	1	1	all	7	all	7	1
1632	PS3653	ipp-5	15	JU1325	Heterospecific	1	41	72	395	3	3	2	2	1	1	1	all	7	all	7	1
1633	PS3653	ipp-5	15	JU1325	Heterospecific	1	41	72	395	2	2	2	2	2	1	1	all	7	all	7	1
1634	PS3653	ipp-5	15	JU1325	Heterospecific	1	41	72	395	2	2	2	2	2	1	1	all	7	all	7	1
1635	PS3653	ipp-5	15	JU1325	Heterospecific	1	41	72	395	2	2	2	2	2	1	1	all	7	all	7	1
1636	PS3653	ipp-5	15	JU1325	Heterospecific	1	41	72	395	2	2	2	2	2	1	1	all	7	all	7	1
654	PS4112	plc-1	16	JU1325	Heterospecific	1	47	79	283	2	3	2	2	1	1	1	all	7	all	7	1
656	PS4112	plc-1	16	JU1325	Heterospecific	1	47	79	283	2	3	2	2	1	1	1	all	7	all	7	1
855	PS4112	plc-1	16	JU1325	Heterospecific	1	47	74	257	2	3	2	2	2	1	1	all	7	all	7	1
15	PS4330	spe-41	17	JU1325	Heterospecific	1	46	41	376	3	3	1	2	1	1	1	all	7	all	7	1
605	PS4330	spe-41	17	JU1325	Heterospecific	1	49	71	433	3	3	2	2	2	1	1	all	7	all	7	1
904	PS4330	spe-41	17	JU1325	Heterospecific	1	45	72	323	2	3	2	1	1	1	1	all	7	all	7	1
905	PS4330	spe-41	17	JU1325	Heterospecific	1	45	72	323	2	2	1	1	1	1	1	all	7	all	7	1
906	PS4330	spe-41	17	JU1325	Heterospecific	1	45	72	323	2	2	1	1	1	1	1	all	7	all	7	1
907	PS4330	spe-41	17	JU1325	Heterospecific	1	45	72	323	2	3	2	1	1	1	1	all	7	all	7	1
1177	PS4330	spe-41	17	JU1325	Heterospecific	1	43	82	403	2	2	1	1	1	1	1	all	7	all	7	1
1179	PS4330	spe-41	17	JU1325	Heterospecific	1	43	82	403	2	2	1	1	1	1	1	all	7	all	7	1
1180	PS4330	spe-41	17	JU1325	Heterospecific	1	43	82	403	2	2	1	1	1	1	1	all	7	all	7	1
1184	PS4330	spe-41	17	JU1325	Heterospecific	1	43	82	403	2	2	2	1	1	1	1	all	7	all	7	1
1185	PS4330	spe-41	17	JU1325	Heterospecific	1	43	82	403	2	2	2	1	1	1	1	all	7	all	7	1
30	RB1353	spv-1	18	JU1325	Heterospecific	1	49	40	405	3	3	1	1	1	1	1	all	7	all	7	1
32	RB1353	spv-1	18	JU1325	Heterospecific	1	49	40	405	3	3	1	1	1	1	1	all	7	all	7	1
794	RB1353	spv-1	18	JU1325	Heterospecific	1	44	72	408	2	3	2	2	1	1	1	all	7	all	7	1
795	RB1353	spv-1	18	JU1325	Heterospecific	1	44	72	408	1	3	1	2	1	1	1	all	7	all	7	1
796	RB1353	spv-1	18	JU1325	Heterospecific	1	44	72	408	2	3	2	2	1	1	1	all	7	all	7	1
797	RB1353	spv-1	18	JU1325	Heterospecific	1	44	72	408	2	3	2	2	1	1	1	all	7	all	7	1
799	RB1353	spv-1	18	JU1325	Heterospecific	1	44	72	408	3	3	2	2	2	1	1	all	7	all	7	1
802	RB1353	spv-1	18	JU1325	Heterospecific	1	44	72	408	2	2	1	2	1	2	1	all	7	all	7	1
803	RB1353	spv-1	18	JU1325	Heterospecific	1	44	72	408	2	3	1	2	1	2	1	all	7	all	7	1
804	RB1353	spv-1	18	JU1325	Heterospecific	1	44	72	408	2	2	2	2	1	1	1	all	7	all	7	1
1588	RB1353	spv-1	18	JU1325	Heterospecific	1	45	75	355	2	2	2	2	2	1	1	all	7	all	7	1
1590	RB1353	spv-1	18	JU1325	Heterospecific	1	45	75	355	2	3	2	2	1	1	1	all	7	all	7	1
1595	RB1353	spv-1	18	JU1325	Heterospecific	1	45	75	355	2	2	2	2	2	2	1	all	7	all	7	1
189	RB1823	gst-4	19	JU1325	Heterospecific	1	43	35	351	3	3	2	1	1	1	1	all	7	all	7	1
367	RB1823	gst-4	19	JU1325	Heterospecific	1	47	70	344	3	3	2	1	1	1	1	all	7	all	7	1
370	RB1823	gst-4	19	JU1325	Heterospecific	1	47	70	344	3	3	2	2	1	1	1	all	7	all	7	1
372	RB1823	gst-4	19	JU1325	Heterospecific	1	47	70	344	2	3	2	2	2	1	1	all	7	all	7	1
750	RB1823	gst-4	19	JU1325	Heterospecific	1	46	70	354	2	2	0	1	1	1	1	prox ut +dist ut	4	all	7	1
753	RB1823	gst-4	19	JU1325	Heterospecific	1	46	70	354	2	2	1	1	1	1	1	all	7	all	7	1
754	RB1823	gst-4	19	JU1325	Heterospecific	1	46	70	354	2	2	1	1	1	1	1	all	7	all	7	1
755	RB1823	gst-4	19	JU1325	Heterospecific	1	46	70	354	3	3	2	1	1	1	1	all	7	all	7	1
759	RB1823	gst-4	19	JU1325	Heterospecific	1	46	70	354	2	2	1	1	1	1	1	all	7	all	7	1
465	SL1138	spe-42	20	JU1325	Heterospecific	1	47	70	364	3	3	1	1	1	1	1	all	7	all	7	1
466	SL1138	spe-42	20	JU1325	Heterospecific	1	47	70	364	2	3	1	1	1	1	1	all	7	all	7	1
1075	SL1138	spe-42	20	JU1325	Heterospecific	1	50	81	360	2	2	1	1	1	1	1	all	7	all	7	1
1342	SL1138	spe-42	20	JU1325	Heterospecific	1	48	85	427	2	2	1	1	1	2	1	all	7	all	7	1
1343	SL1138	spe-42	20	JU1325	Heterospecific	1	48	85	427	2	2	2	2	2	2	1	all	7	all	7	1
242	TX183	oma-1,2	21	JU1325	Heterospecific	1	45	68	302	2	3	2	1	1	1	1	all	7	all	7	1
972	TX183	oma-1,2	21	JU1325	Heterospecific	1	47	75	336	3	3	2	2	1	2	1	all	7	all	7	1
973	TX183	oma-1,2	21	JU1325	Heterospecific	1	47	75	336	3	3	1	1	1	1	1	all	7	all	7	1
1115	TX183	oma-1,2	21	JU1325	Heterospecific	1	50	82	327	3	3	2	2	1	1	1	all	7	all	7	1
1116	TX183	oma-1,2	21	JU1325	Heterospecific	1	50	82	327	2	2	1	1	1	1	1	all	7	all	7	1
1117	TX183	oma-1,2	21	JU1325	Heterospecific	1	50	82	327	2	2	1	1	1	1	1	all	7	all	7	1
1124	TX183	oma-1,2	21	JU1325	Heterospecific	1	50	82	327	2	2	2	2	2	2	1	all	7	all	7	1
612	JT73	itr-1(sa73)	22	JU1325	Heterospecific	1	49	71	445	2	3	2	2	1	1	1	all	7	all	7	1
613	JT73	itr-1(sa73)	22	JU1325	Heterospecific	1	49	71	445	2	2	1	1	1	1	1	all	7	all	7	1
614	JT73	itr-1(sa73)	22	JU1325	Heterospecific	1	49	71	445	3	3	2	2	1	2	1	all	7	all	7	1
870	JT73	itr-1(sa73)	22	JU1325	Heterospecific	1	46	73	279	1	3	2	2	1	1	1	all	7	all	7	1
871	JT73	itr-1(sa73)	22	JU1325	Heterospecific	1	46	73	279	2	3	2	2	1	1	1	all	7	all	7	1
872	JT73	itr-1(sa73)	22	JU1325	Heterospecific	1	46	73	279	2	2	2	2	1	1	1	all	7	all	7	1
1042	JT73	itr-1(sa73)	22	JU1325	Heterospecific	1	52	80	339	3	3	2	2	1	1	1	all	7	all	7	1
1044	JT73	itr-1(sa73)	22	JU1325	Heterospecific	1	52	80	339	3	3	2	2	1	1	1	all	7	all	7	1
1046	JT73	itr-1(sa73)	22	JU1325	Heterospecific	1	52	80	339	3	3	2	1	1	1	1	all	7	all	7	1
1047	JT73	itr-1(sa73)	22	JU1325	Heterospecific	1	52	80	339	2	2	2	1	1	1	1	all	7	all	7	1
1051	JT73	itr-1(sa73)	22	JU1325	Heterospecific	1	52	80	339	2	2	2	2	1	1	1	all	7	all	7	1
1054	JT73	itr-1(sa73)	22	JU1325	Heterospecific	1	52	80	339	3	3	2	2	1	1	1	all	7	all	7	1
1055	JT73	itr-1(sa73)	22	JU1325	Heterospecific	1	52	80	339	3	3	2	2	1	1	1	all	7	all	7	1
561	DH1390	rme-2	23	JU1325	Heterospecific	1	50	69	399	2	3	1	1	1	1	1	all	7	all	7	1
562	DH1390	rme-2	23	JU1325	Heterospecific	1	50	69	399	3	3	1	1	1	1	1	all	7	all	7	1
566	DH1390	rme-2	23	JU1325	Heterospecific	1	50	69	399	2	3	1	1	1	1	1	all	7	all	7	1
567	DH1390	rme-2	23	JU1325	Heterospecific	1	50	69	399	3	3	2	1	1	1	1	all	7	all	7	1
568	DH1390	rme-2	23	JU1325	Heterospecific	1	50	69	399	2	2	1	1	1	1	1	all	7	all	7	1
936	DH1390	rme-2	23	JU1325	Heterospecific	1	52	70	292	3	3	2	2	2	1	1	all	7	all	7	1
938	DH1390	rme-2	23	JU1325	Heterospecific	1	52	70	292	3	3	1	1	1	1	1	all	7	all	7	1
939	DH1390	rme-2	23	JU1325	Heterospecific	1	52	70	292	3	3	2	1	1	1	1	all	7	all	7	1
940	DH1390	rme-2	23	JU1325	Heterospecific	1	52	70	292	3	3	2	2	2	1	1	all	7	all	7	1
941	DH1390	rme-2	23	JU1325	Heterospecific	1	52	70	292	3	3	2	2	2	1	1	all	7	all	7	1
942	DH1390	rme-2	23	JU1325	Heterospecific	1	52	70	292	3	3	2	2	2	1	1	all	7	all	7	1
1291	BX17	fat-4	24	JU1325	Heterospecific	1	51	85	396	2	2	2	1	1	1	1	all	7	all	7	1
1293	BX17	fat-4	24	JU1325	Heterospecific	1	51	85	396	3	3	2	1	1	1	1	all	7	all	7	1
1295	BX17	fat-4	24	JU1325	Heterospecific	1	51	85	396	2	2	2	1	1	1	1	all	7	all	7	1
1296	BX17	fat-4	24	JU1325	Heterospecific	1	51	85	396	2	3	2	2	1	1	1	all	7	all	7	1
1297	BX17	fat-4	24	JU1325	Heterospecific	1	51	85	396	2	2	2	2	2	2	1	all	7	all	7	1
1301	BX17	fat-4	24	JU1325	Heterospecific	1	51	85	396	2	2	1	1	1	1	1	all	7	all	7	1
1303	BX17	fat-4	24	JU1325	Heterospecific	1	51	85	396	2	2	1	1	1	1	1	all	7	all	7	1
1410	BX17	fat-4	24	JU1325	Heterospecific	1	61	78	316	3	3	2	2	2	2	1	all	7	all	7	1
1414	BX17	fat-4	24	JU1325	Heterospecific	1	61	78	316	2	3	2	1	1	1	1	all	7	all	7	1
1417	BX17	fat-4	24	JU1325	Heterospecific	1	61	78	316	2	3	2	1	1	1	1	all	7	all	7	1
1221	BX24	fat-1	25	JU1325	Heterospecific	1	55	84	298	3	3	2	1	1	1	1	all	7	all	7	1
1527	BX24	fat-1	25	JU1325	Heterospecific	1	53	86	400	2	2	2	2	1	1	1	all	7	all	7	1
1533	BX24	fat-1	25	JU1325	Heterospecific	1	53	86	400	2	2	2	1	1	1	1	all	7	all	7	1
1371	BX26	fat-2	26	JU1325	Heterospecific	1	58	77	287	2	3	2	2	2	2	1	all	7	all	7	1
1556	BX26	fat-2	26	JU1325	Heterospecific	1	46	76	326	3	3	2	2	2	2	1	all	7	all	7	1
1565	BX26	fat-2	26	JU1325	Heterospecific	1	46	76	326	2	2	2	2	2	1	1	all	7	all	7	1
1567	BX26	fat-2	26	JU1325	Heterospecific	1	46	76	326	2	2	2	2	1	1	1	all	7	all	7	1
1568	BX26	fat-2	26	JU1325	Heterospecific	1	46	76	326	2	3	2	2	2	1	1	all	7	all	7	1
1442	BX30	fat-3	27	JU1325	Heterospecific	1	55	82	359	2	2	2	2	1	1	1	all	7	all	7	1
1453	BX30	fat-3	27	JU1325	Heterospecific	1	55	82	359	2	2	2	2	1	1	1	all	7	all	7	1
1460	BX30	fat-3	27	JU1325	Heterospecific	1	55	82	359	2	2	2	2	2	2	1	all	7	all	7	1
1466	BX30	fat-3	27	JU1325	Heterospecific	1	55	82	359	2	2	2	2	1	1	1	all	7	all	7	1
1469	BX30	fat-3	27	JU1325	Heterospecific	1	55	82	359	2	2	2	1	1	1	1	all	7	all	7	1
1253	BX52	fat-1,4	28	JU1325	Heterospecific	1	54	84	363	3	3	1	1	1	1	1	all	7	all	7	1
1264	BX52	fat-1,4	28	JU1325	Heterospecific	1	54	84	363	2	3	1	1	1	1	1	all	7	all	7	1
1501	BX52	fat-1,4	28	JU1325	Heterospecific	1	55	86	385	2	2	2	1	1	1	1	all	7	all	7	1
1503	BX52	fat-1,4	28	JU1325	Heterospecific	1	55	86	385	2	3	2	2	1	1	1	all	7	all	7	1
1506	BX52	fat-1,4	28	JU1325	Heterospecific	1	55	86	385	3	3	2	2	1	1	1	all	7	all	7	1
1510	BX52	fat-1,4	28	JU1325	Heterospecific	1	55	86	385	2	2	2	1	1	1	1	all	7	all	7	1
